# Supplementary material for: The role of Psl in the failure to eradicate Pseudomonas aeruginosa biofilms in children with cystic fibrosis
Source: PubMed Central journal article supplement (PMC8338932; doi:10.1038/s41522-021-00234-3), 2021-08-04

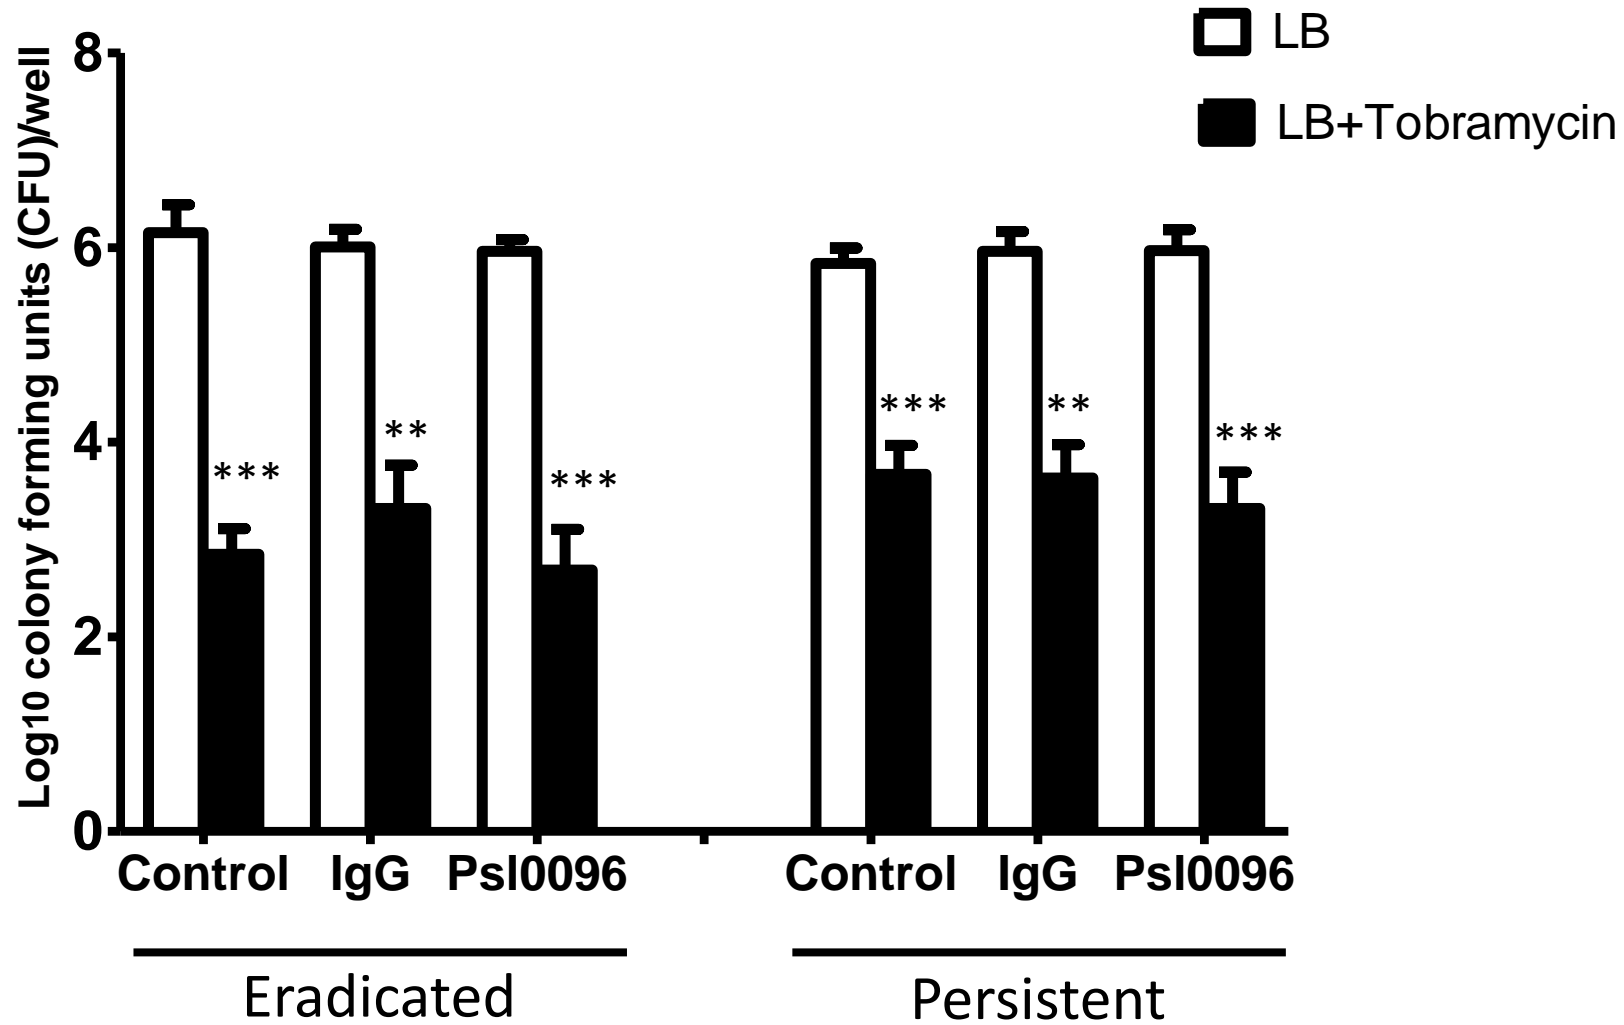

**Supplemental Figure 1.** SickKids *P. aeruginosa* isolates (N=7 Persistent; N=7 Eradicated) were grown as biofilms for 24 hrs after which antibodies (LB control, IgG or anti-Psl 0096) and tobramycin (or LB alone) were added for the following 24 hrs before plating for colony counts. The mean colony forming unit (CFU) per well for each isolate (done in triplicate) was calculated and the log transformed (log<sub>10</sub>) mean of all isolates was plotted with standard error of the mean (SEM). Comparisons with and without tobramycin treatment were performed for each condition using non-parametric Mann-Whitney test \*\*\*p<0.001, \*\*p<0.01

| Strain | E/P          | pslA  | pslB  | pslC  | pslD | pslE  | pslF  | pslG  | pslH  | pslI  | pslJ  | pslK  | pslL  | pslM  | pslN  | pslO  |
|--------|--------------|-------|-------|-------|------|-------|-------|-------|-------|-------|-------|-------|-------|-------|-------|-------|
| 263    | E            | 0     | 1     | 1     | 0    | 0     | 2     | 0     | 1     | 1     | 0     | 3     | 2     | 1     | 1     | 0     |
| 288    | E            | 0     | 1     | 1     | 0    | 0     | 2     | 0     | 1     | 1     | 1     | 1     | 1     | 2     | 1     | 0     |
| 325    | E            | 0     | 2     | 2     | 0    | 1     | 1     | 0     | 3     | 2     | 0     | 2     | 0     | 1     | 0     | 1     |
| 549    | E            | 0     | 0     | 1     | 0    | 0     | 2     | 0     | 1     | 1     | 1     | 1     | 1     | 1     | 1     | 0     |
| 558    | E            | 0     | 0     | 1     | 0    | 0     | 2     | 0     | 1     | 1     | 1     | 1     | 1     | 1     | 1     | 0     |
| 404    | E            | 0     | 2     | 2     | 0    | 1     | 1     | 0     | 3     | 2     | 0     | 2     | 0     | 1     | 0     | 1     |
| 50     | E            | 0     | 0     | 1     | 0    | 0     | 0     | 0     | 0     | 0     | 0     | 0     | 0     | 1     | 0     | 0     |
| 375    | P            | 0     | 1     | 3     | 0    | 1     | 1     | 1     | 2     | 3     | 0     | 1     | 2     | 2     | 0     | 1     |
| 551    | P            | 0     | 0     | 1     | 0    | 0     | 2     | 0     | 1     | 1     | 1     | 1     | 1     | 1     | 1     | 0     |
| 580    | P            | 0     | 1     | 1     | 0    | 0     | 2     | 0     | 1     | 1     | 0     | 3     | 2     | 1     | 1     | 0     |
| 380    | P            | 0     | 1     | 3     | 0    | 1     | 1     | 0     | 1     | 1     | 0     | 1     | 1     | 2     | 0     | 3     |
| 342    | P            | 0     | 0     | 1     | 0    | 0     | 2     | 0     | 1     | 1     | 1     | 1     | 1     | 1     | 1     | 0     |
| 505    | P            | 0     | 1     | 2     | 0    | 0     | 2     | 0     | 2     | 1     | 0     | 0     | 1     | 2     | 0     | 1     |
| 565    | P            | 1     | 0     | 2     | 0    | 1     | 1     | 1     | 1     | 1     | 0     | 1     | 0     | 2     | 0     | 1     |
|        | <b>Ttest</b> | 0.337 | 0.484 | 0.165 | N/A  | 0.611 | 0.698 | 0.147 | 0.765 | 0.718 | 0.611 | 0.580 | 0.290 | 0.109 | 0.626 | 0.223 |

**Supplemental Figure 2.** The number of non-synonymous mutations in each Psl gene was counted for each of the 14 strains. T-test was used to determine whether there was a significant difference in the number of mutations between all 14 of the strains for each Psl gene as well as when all the Psl genes were considered together.

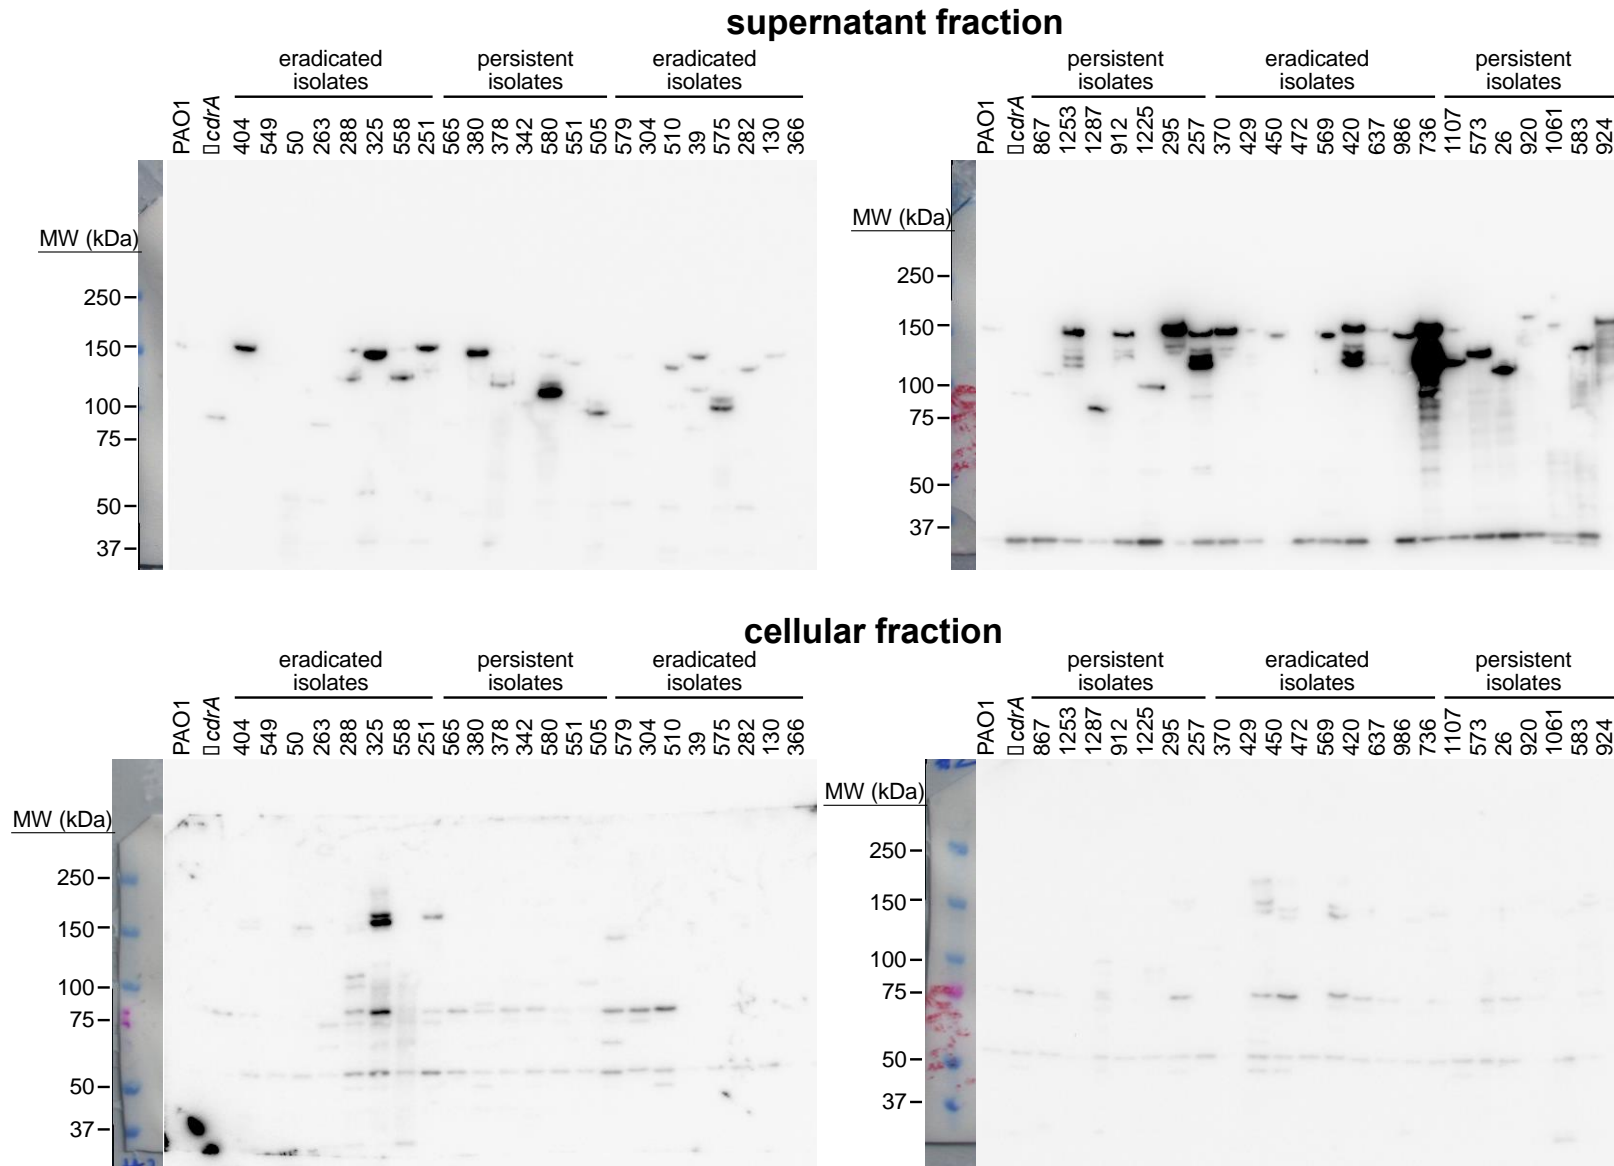

**Supplemental Figure 3.** SickKids *P. aeruginosa* isolates (N=21 Persistent; N=25 Eradicated) were grown as biofilms for 24 h then separated by centrifugation into supernatant and cellular fractions. Samples were then analyzed by western blot analysis using an anti-CdrA antibody. PAO1 was used as a positive control and the CdrA deletion strain (PAO1 $\Delta$ *cdrA*) was used as a negative control. All blots derive from the same experiment and were processed in parallel.

## Supplementary Figure 4



Pa342 (Persistent) Trial1

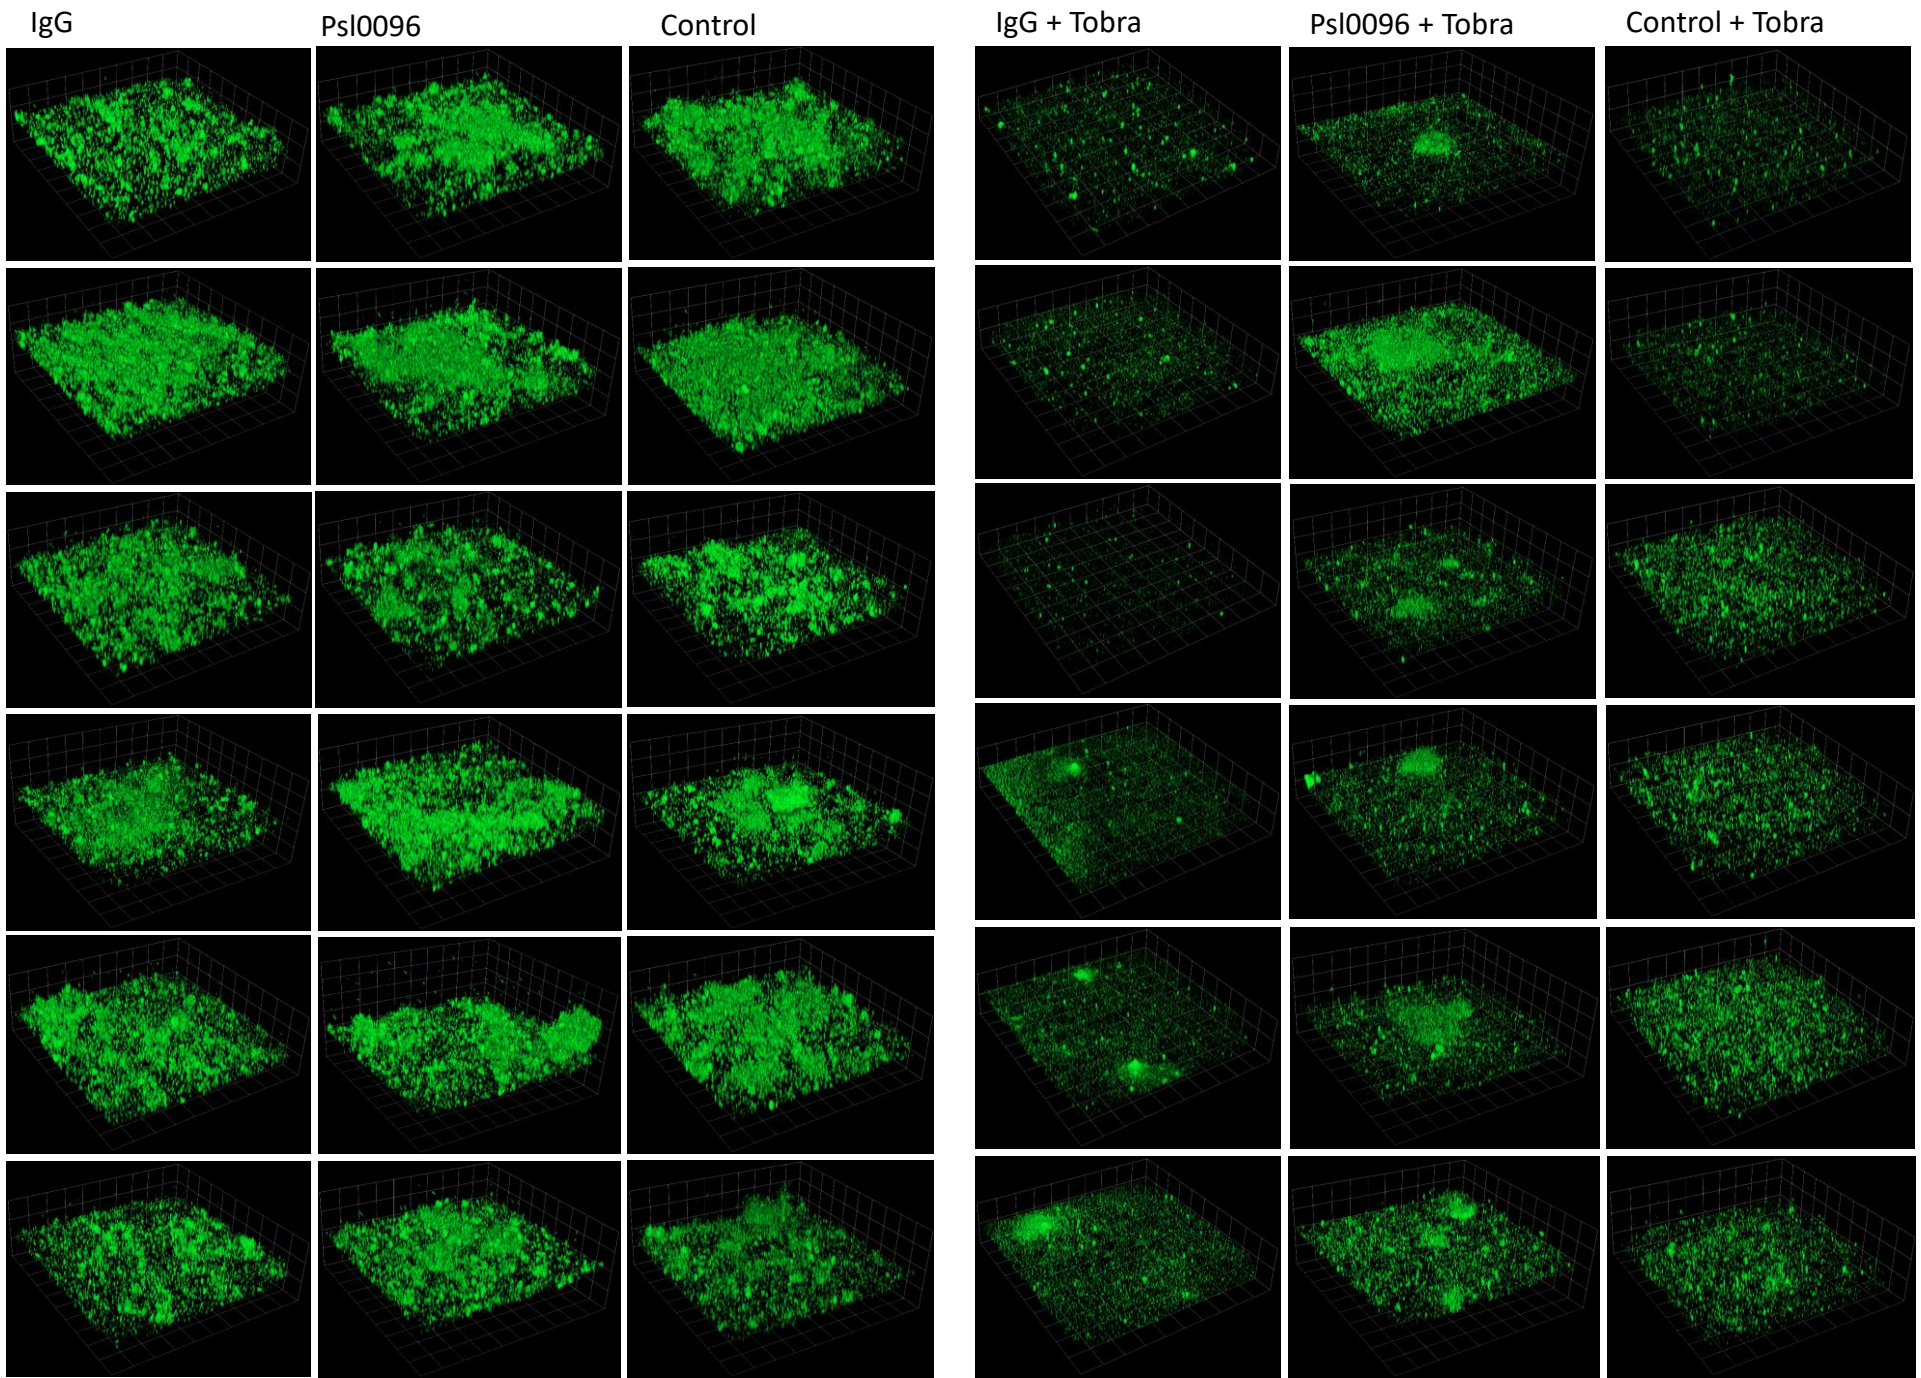



Pa342 (Persistent) Trial2

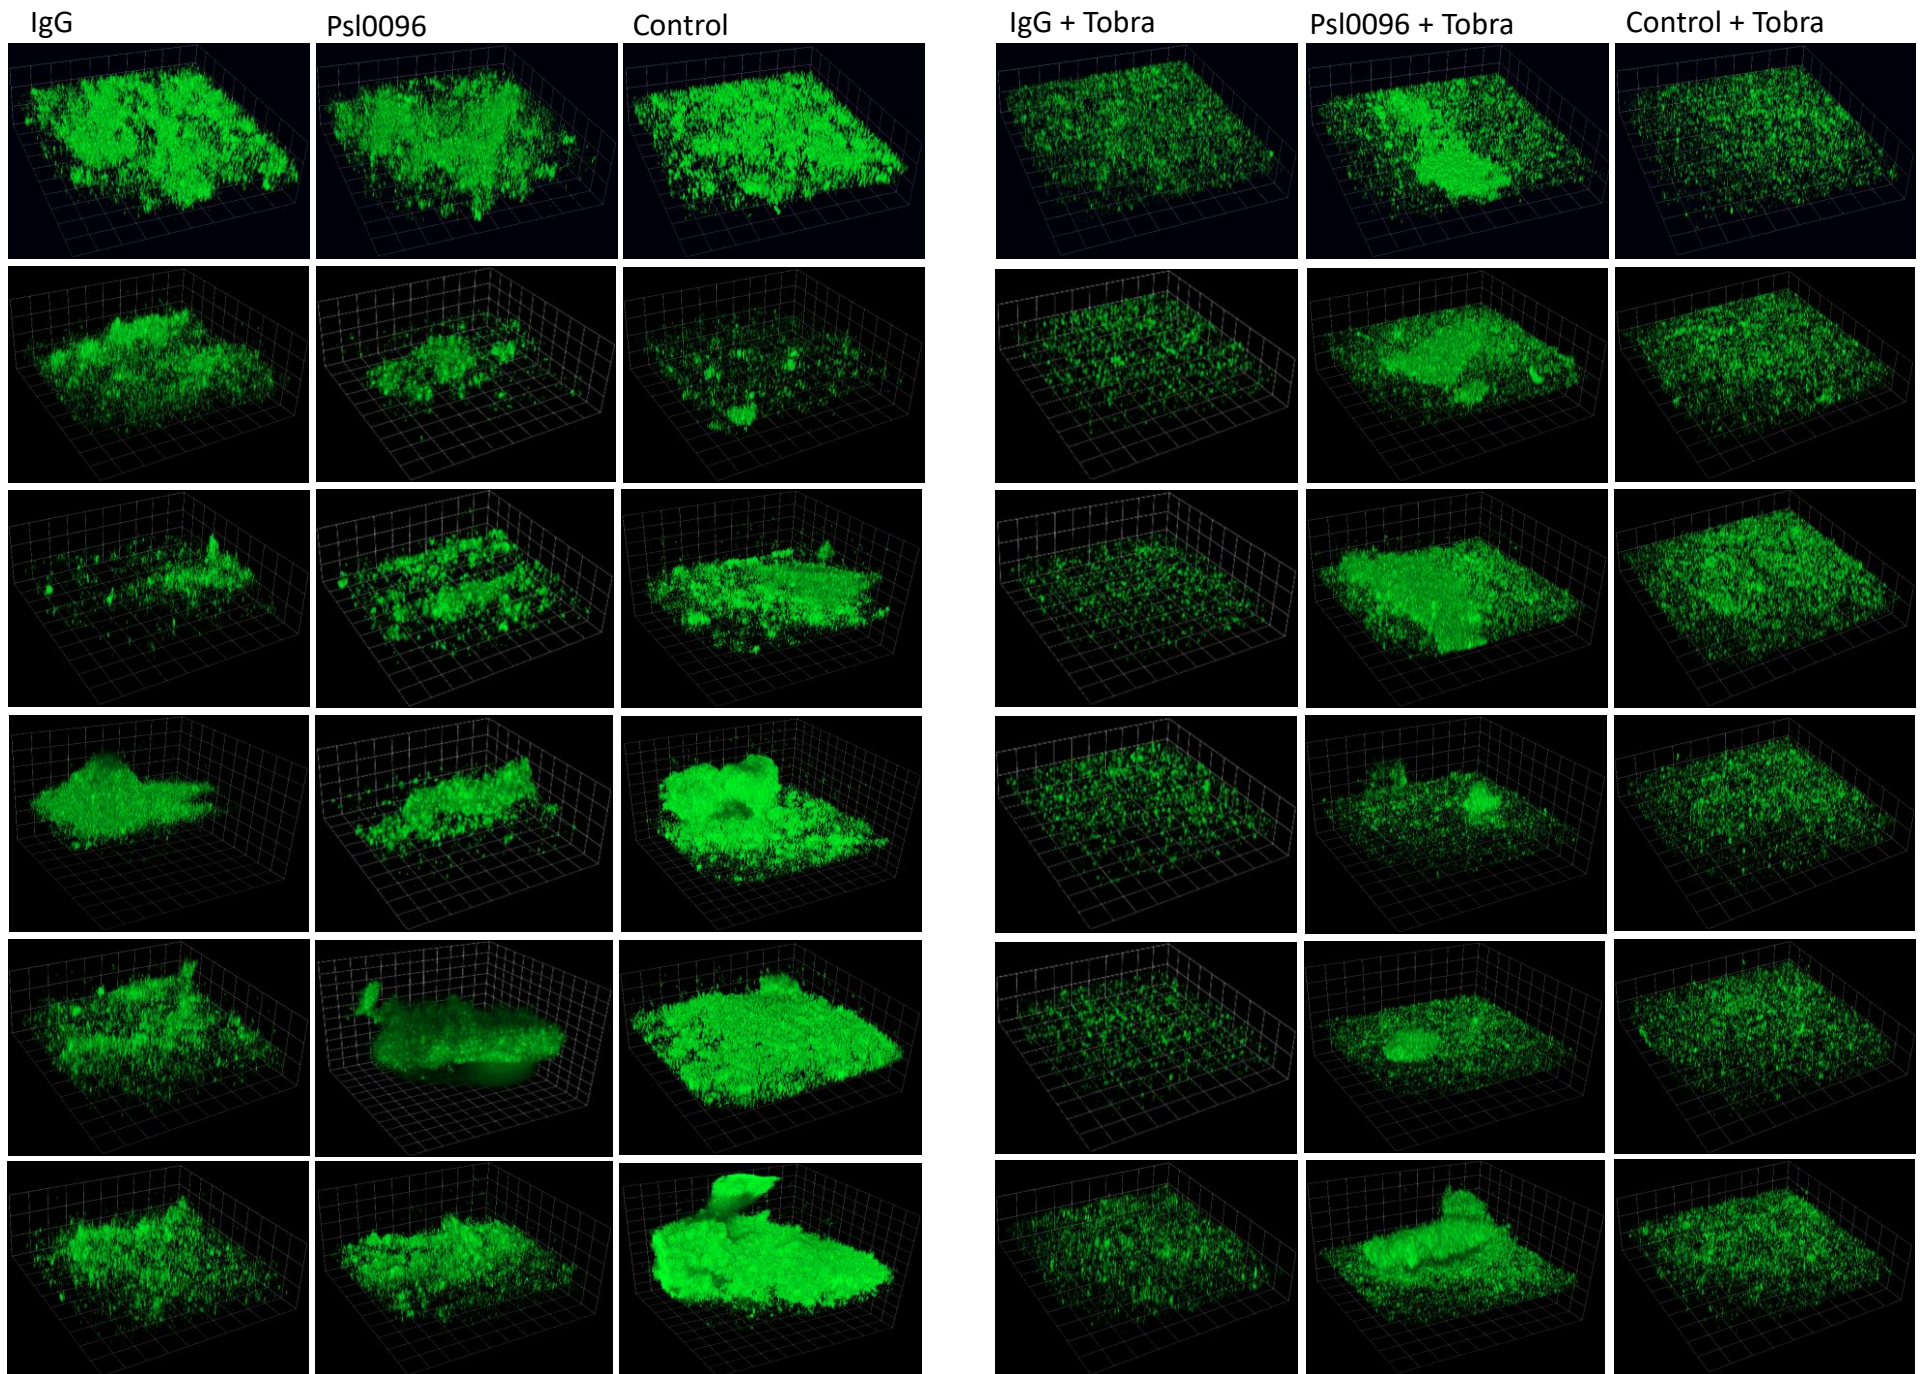



Pa342 (Persistent) Trial3

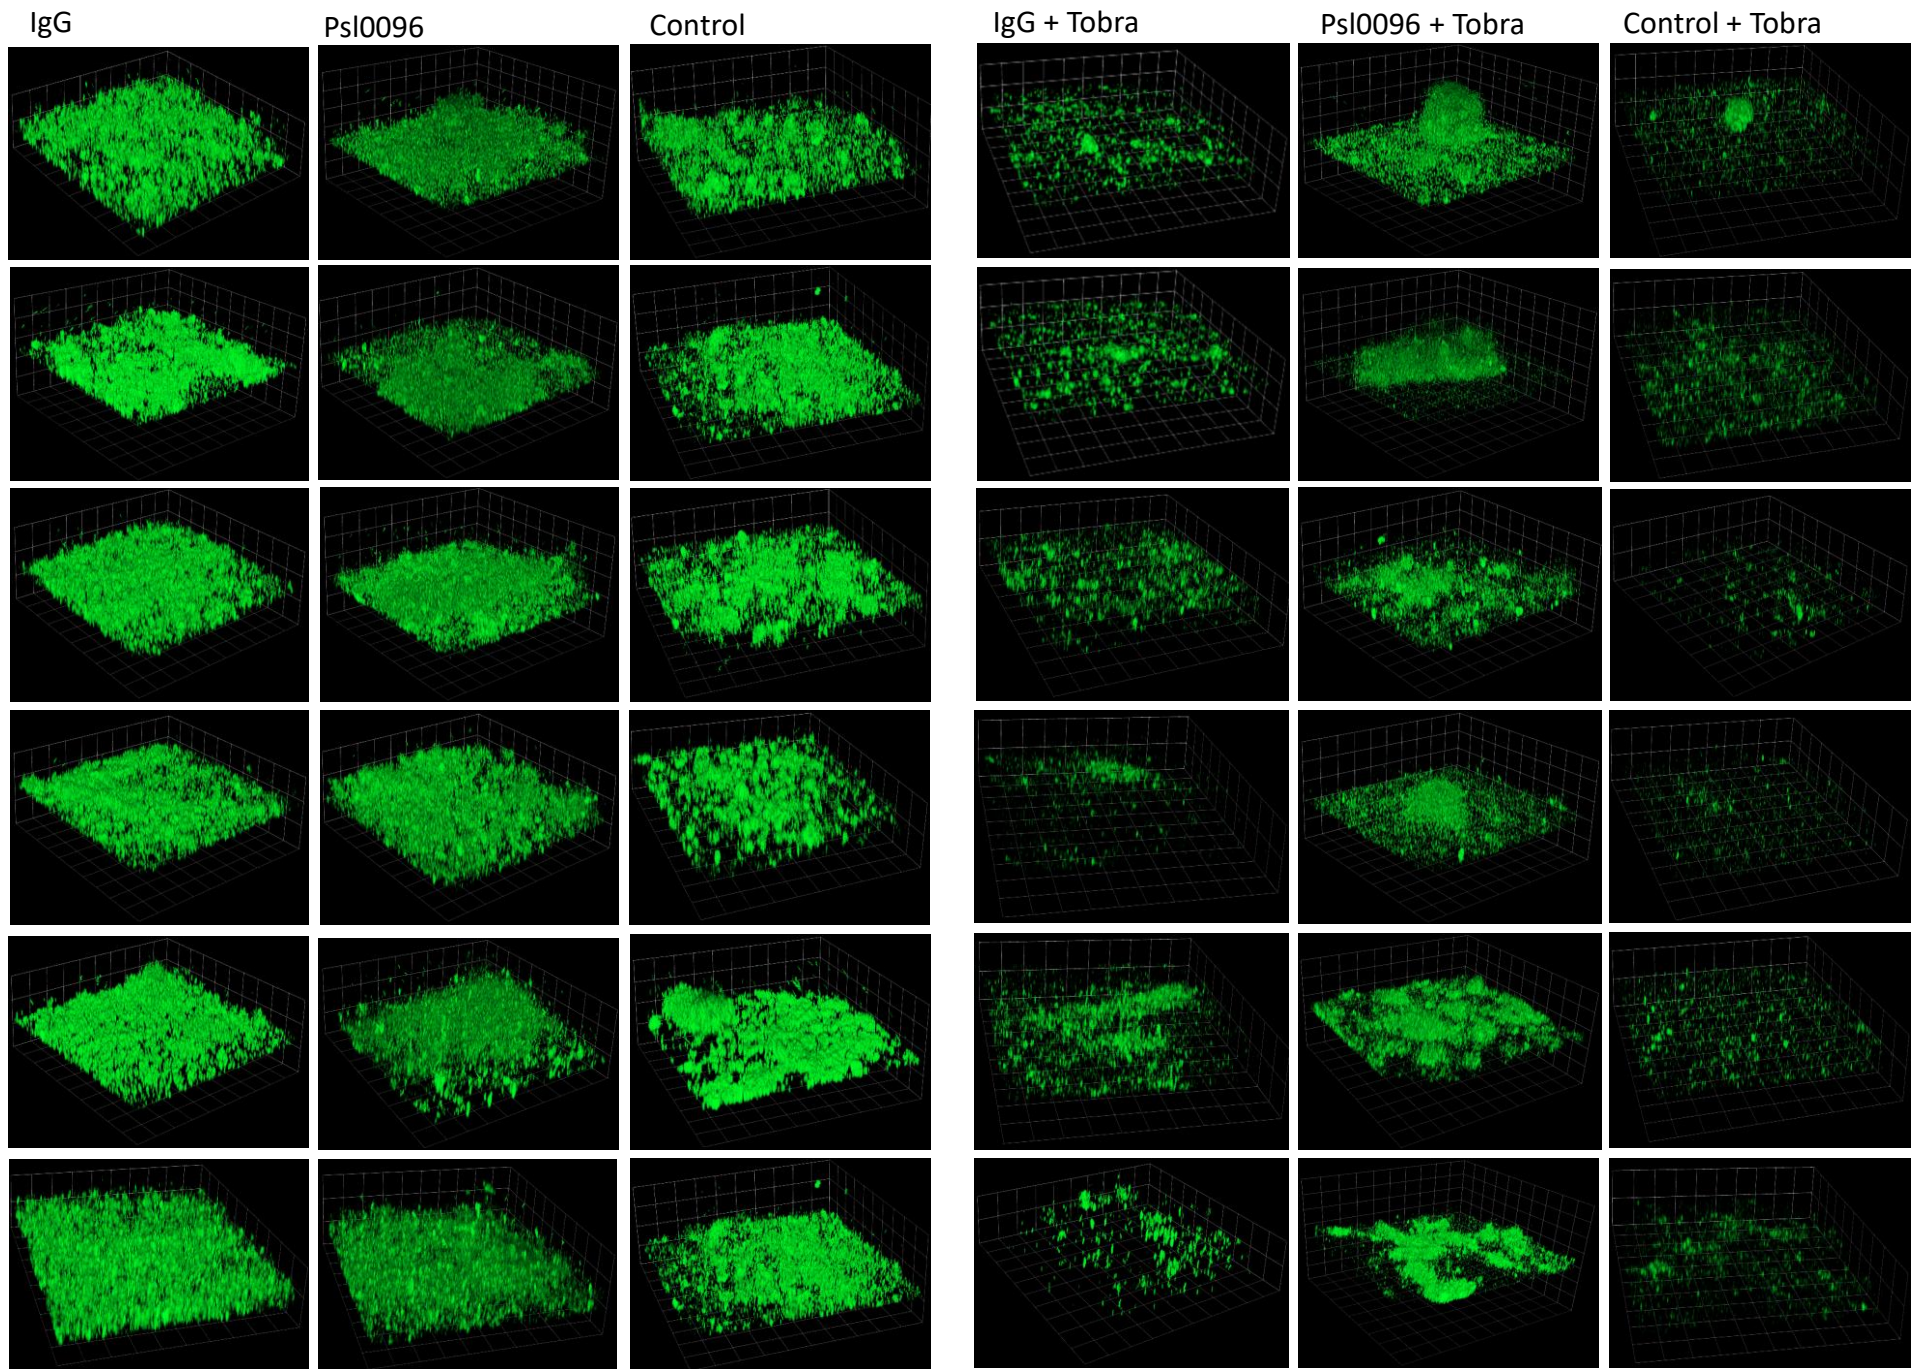



Pa375 (Persistent) Trial1

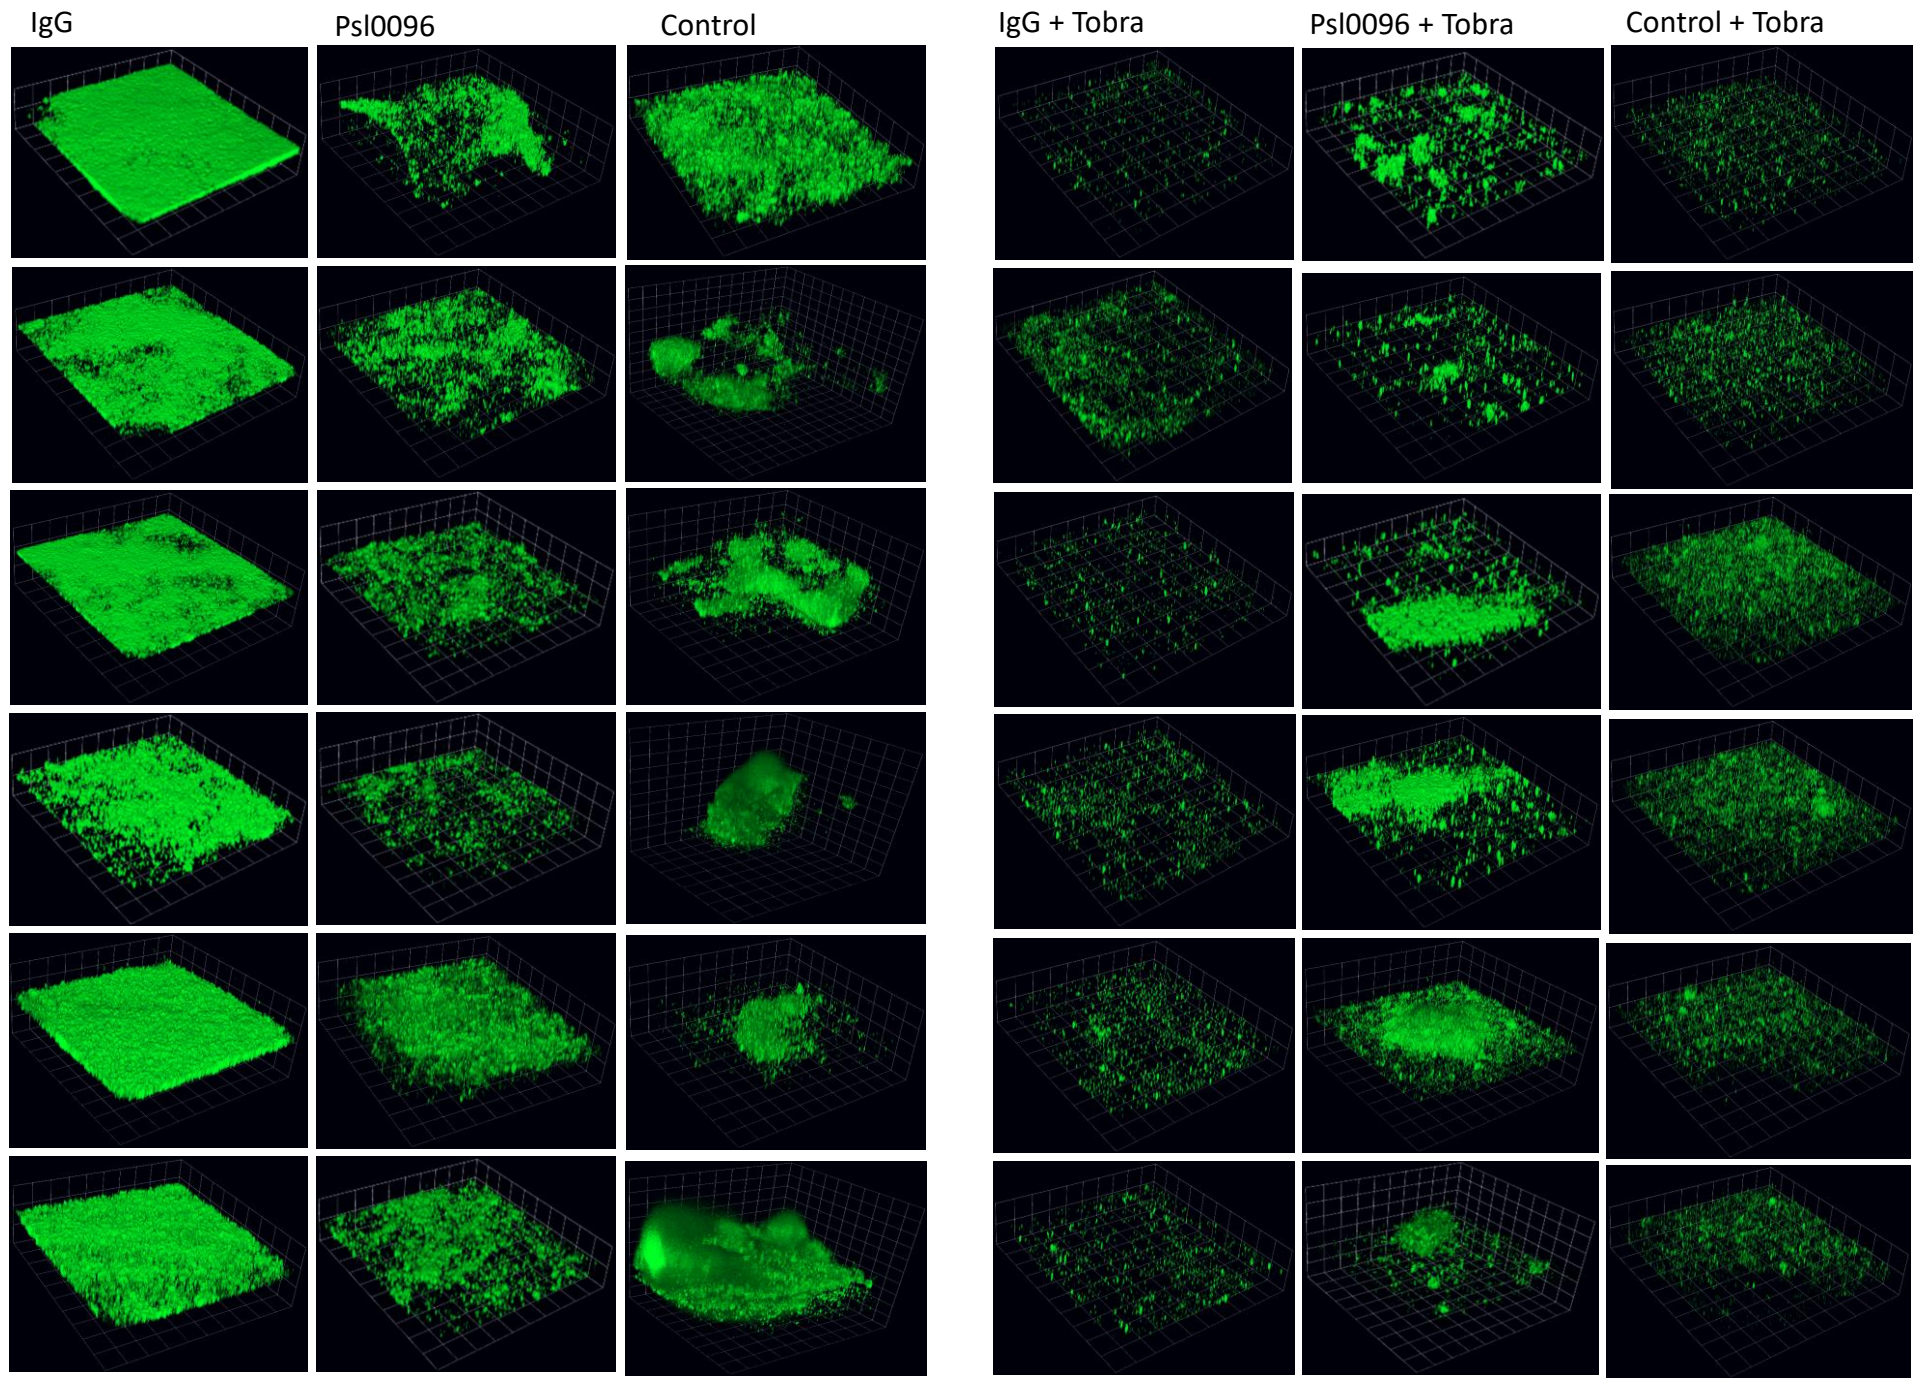



Pa375 (Persistent) Trial2

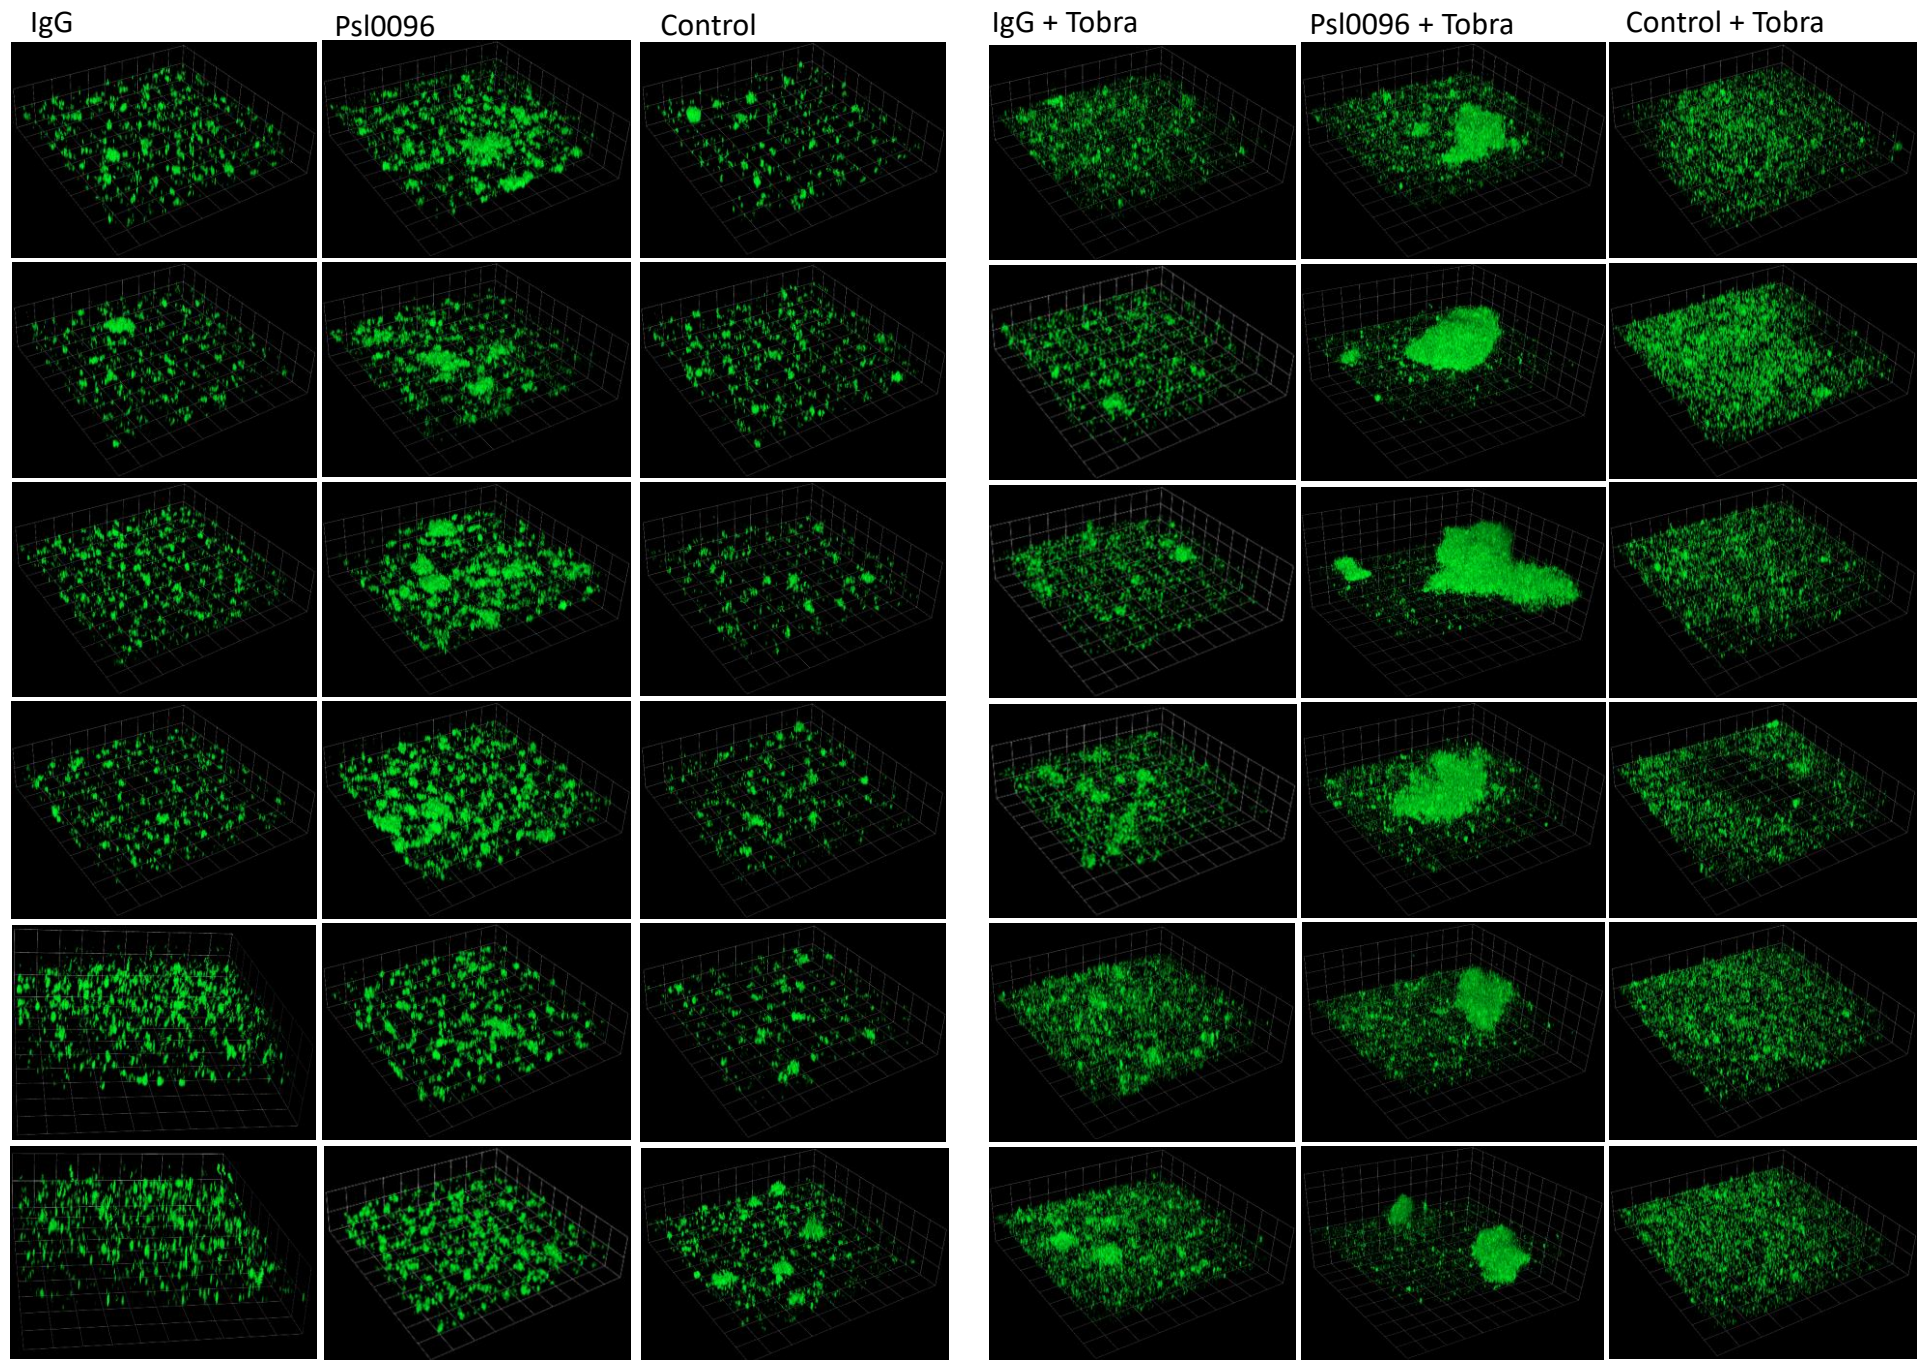



Pa375 (Persistent) Trial3

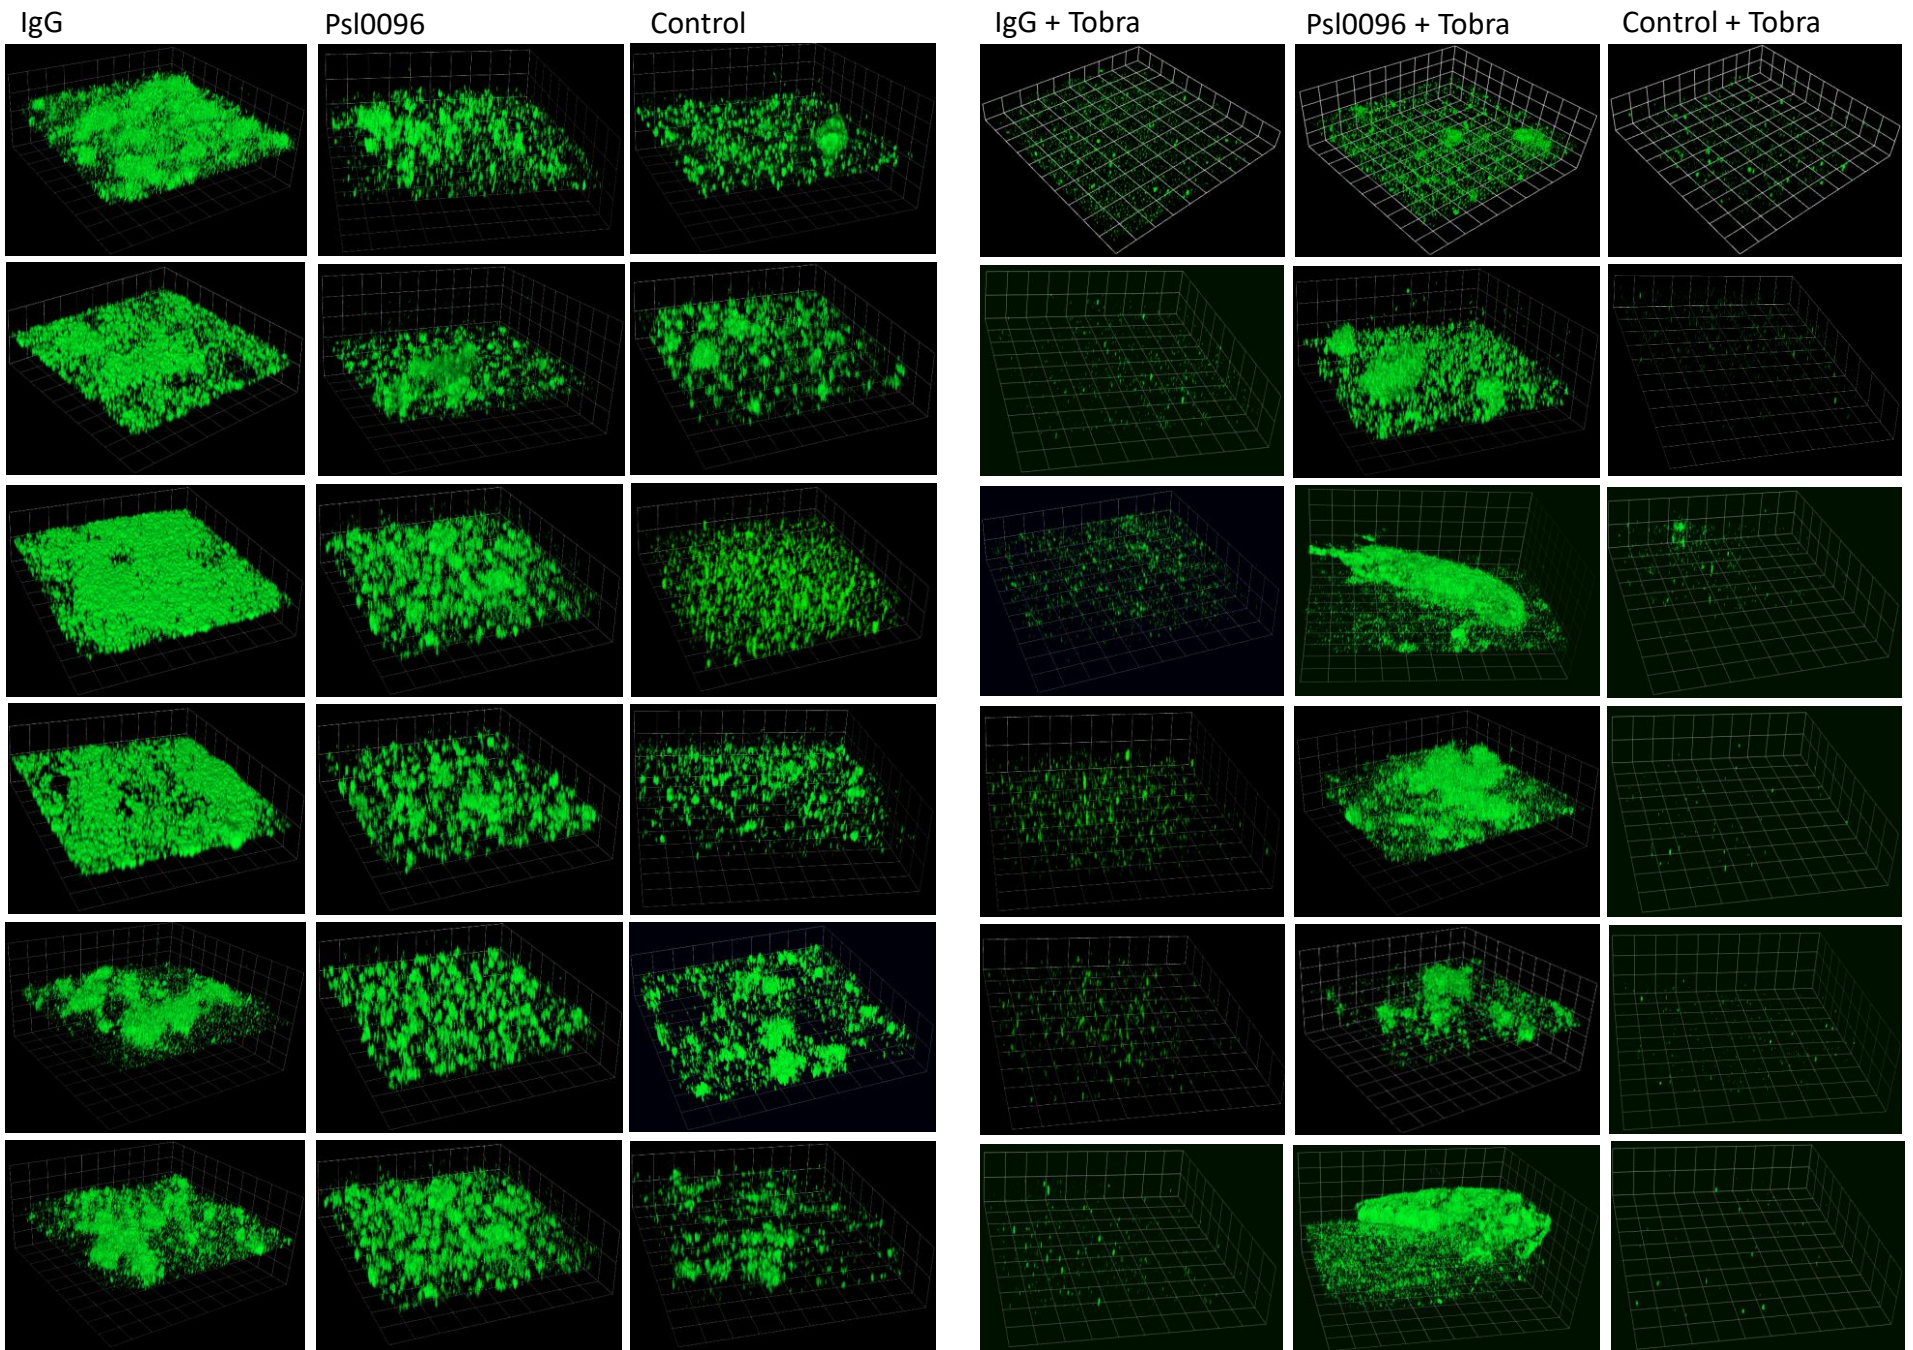



Pa380 (Persistent) Trial1

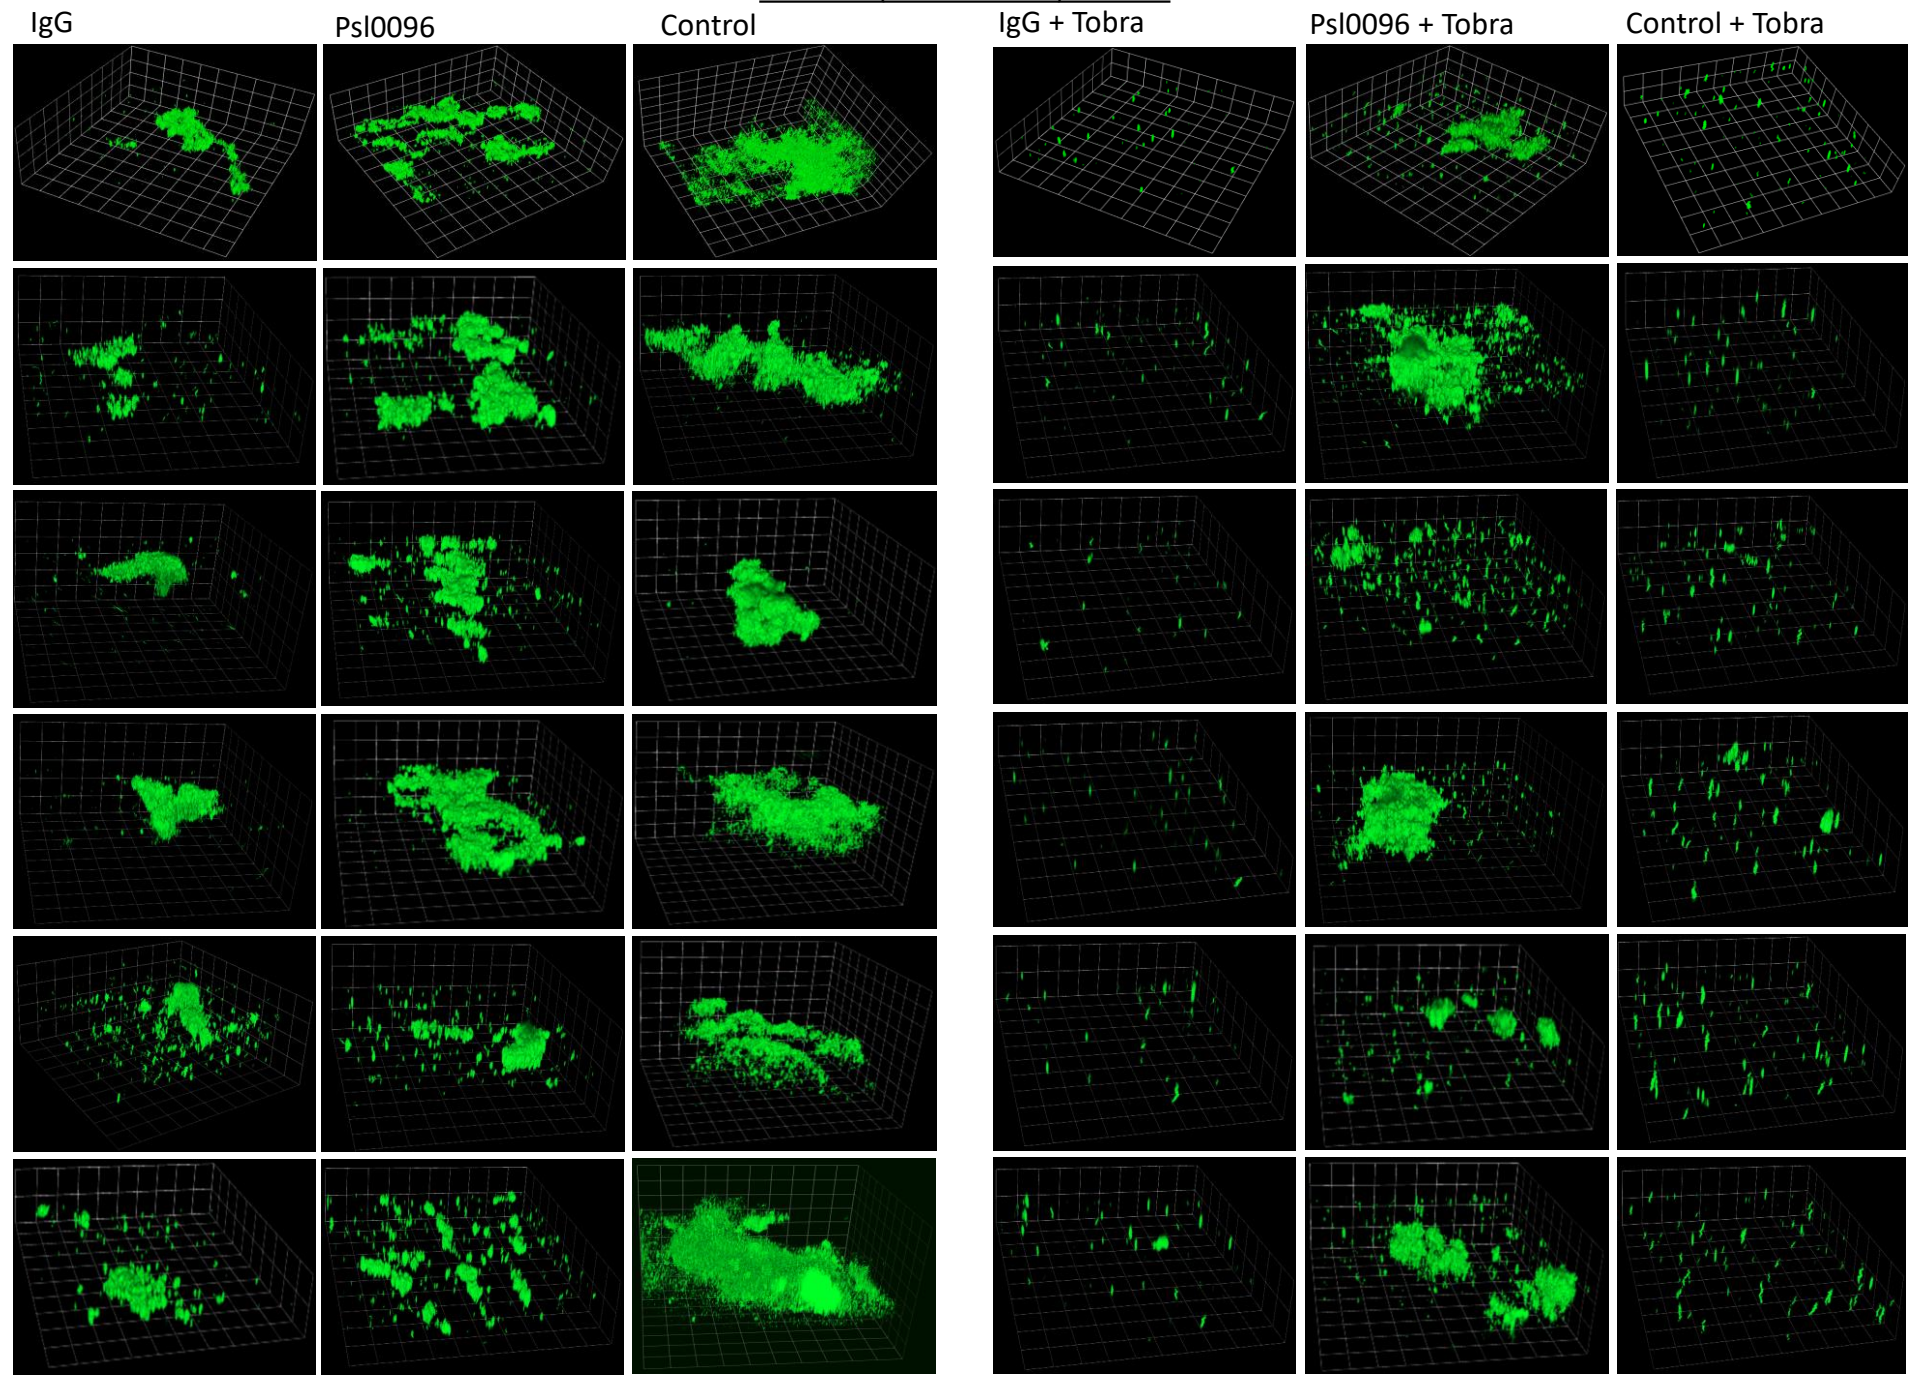



Pa380 (Persistent) Trial2

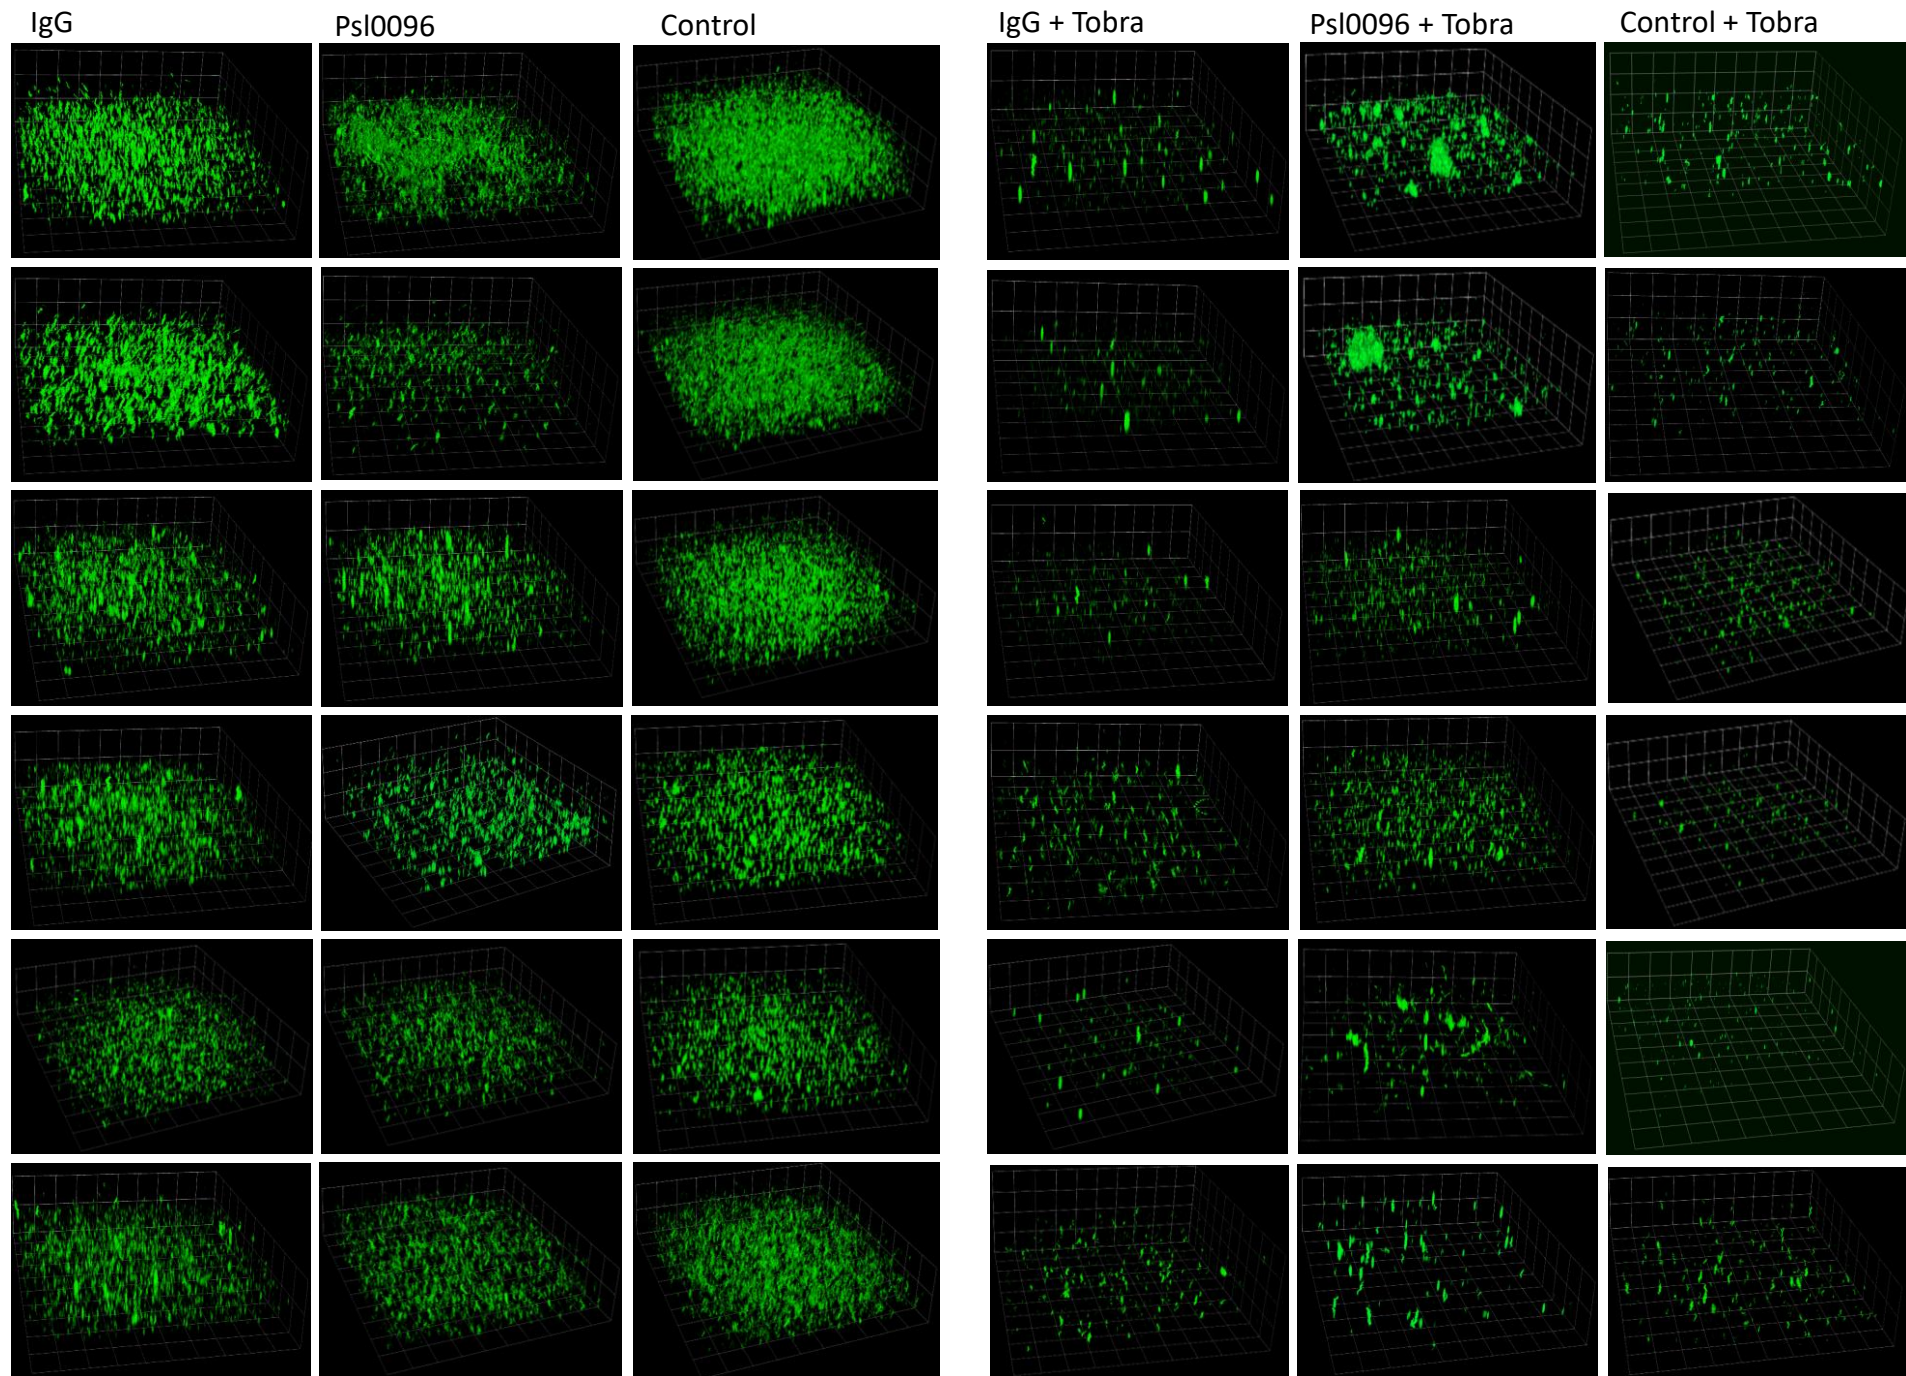



Pa380 (Persistent) Trial3

IgG

PsI0096

Control

IgG + Tobra

PsI0096 + Tobra

Control + Tobra

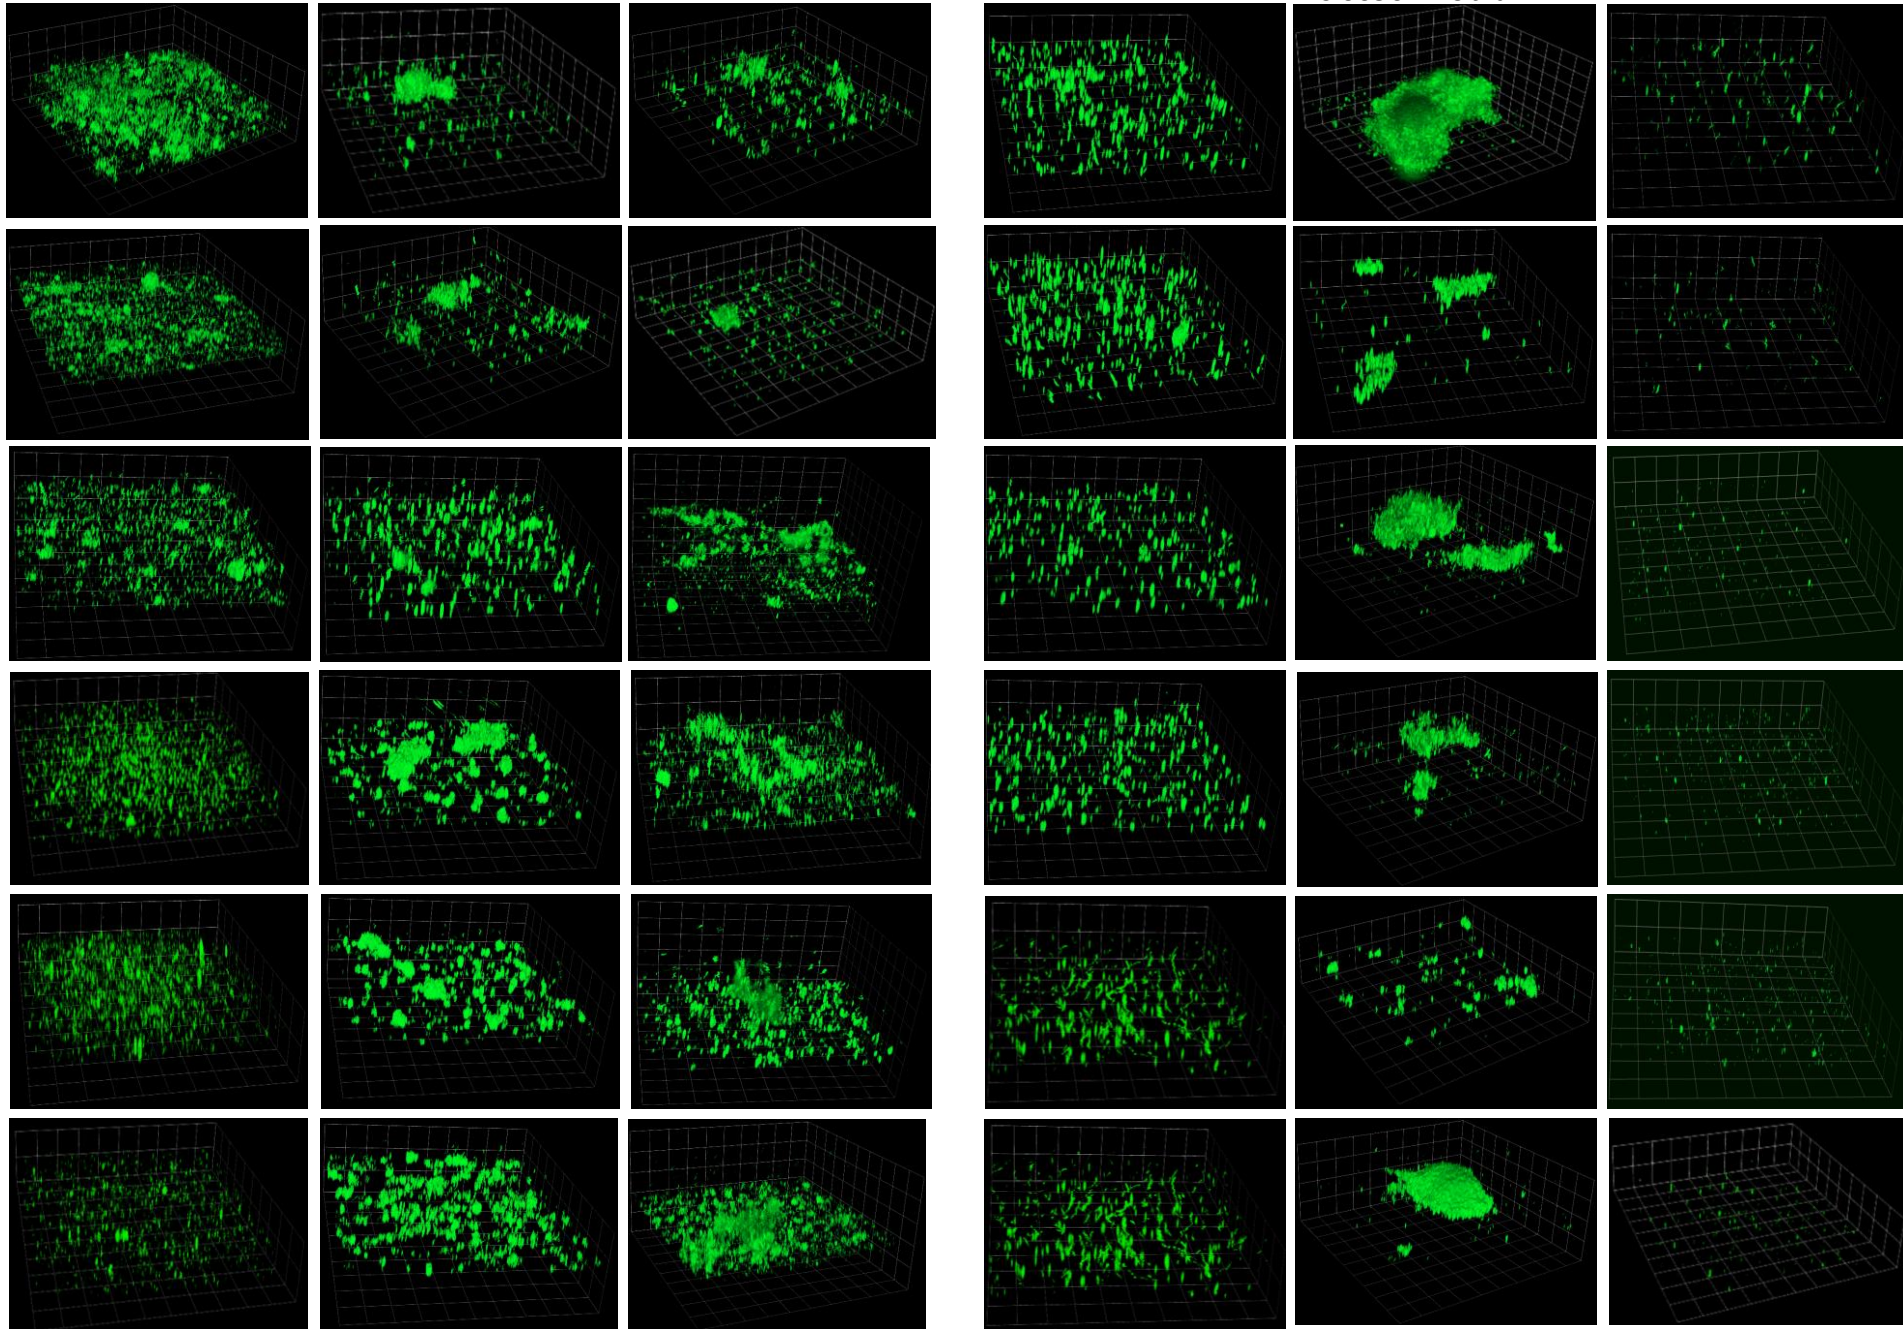



Pa565 (Persistent) Trial1

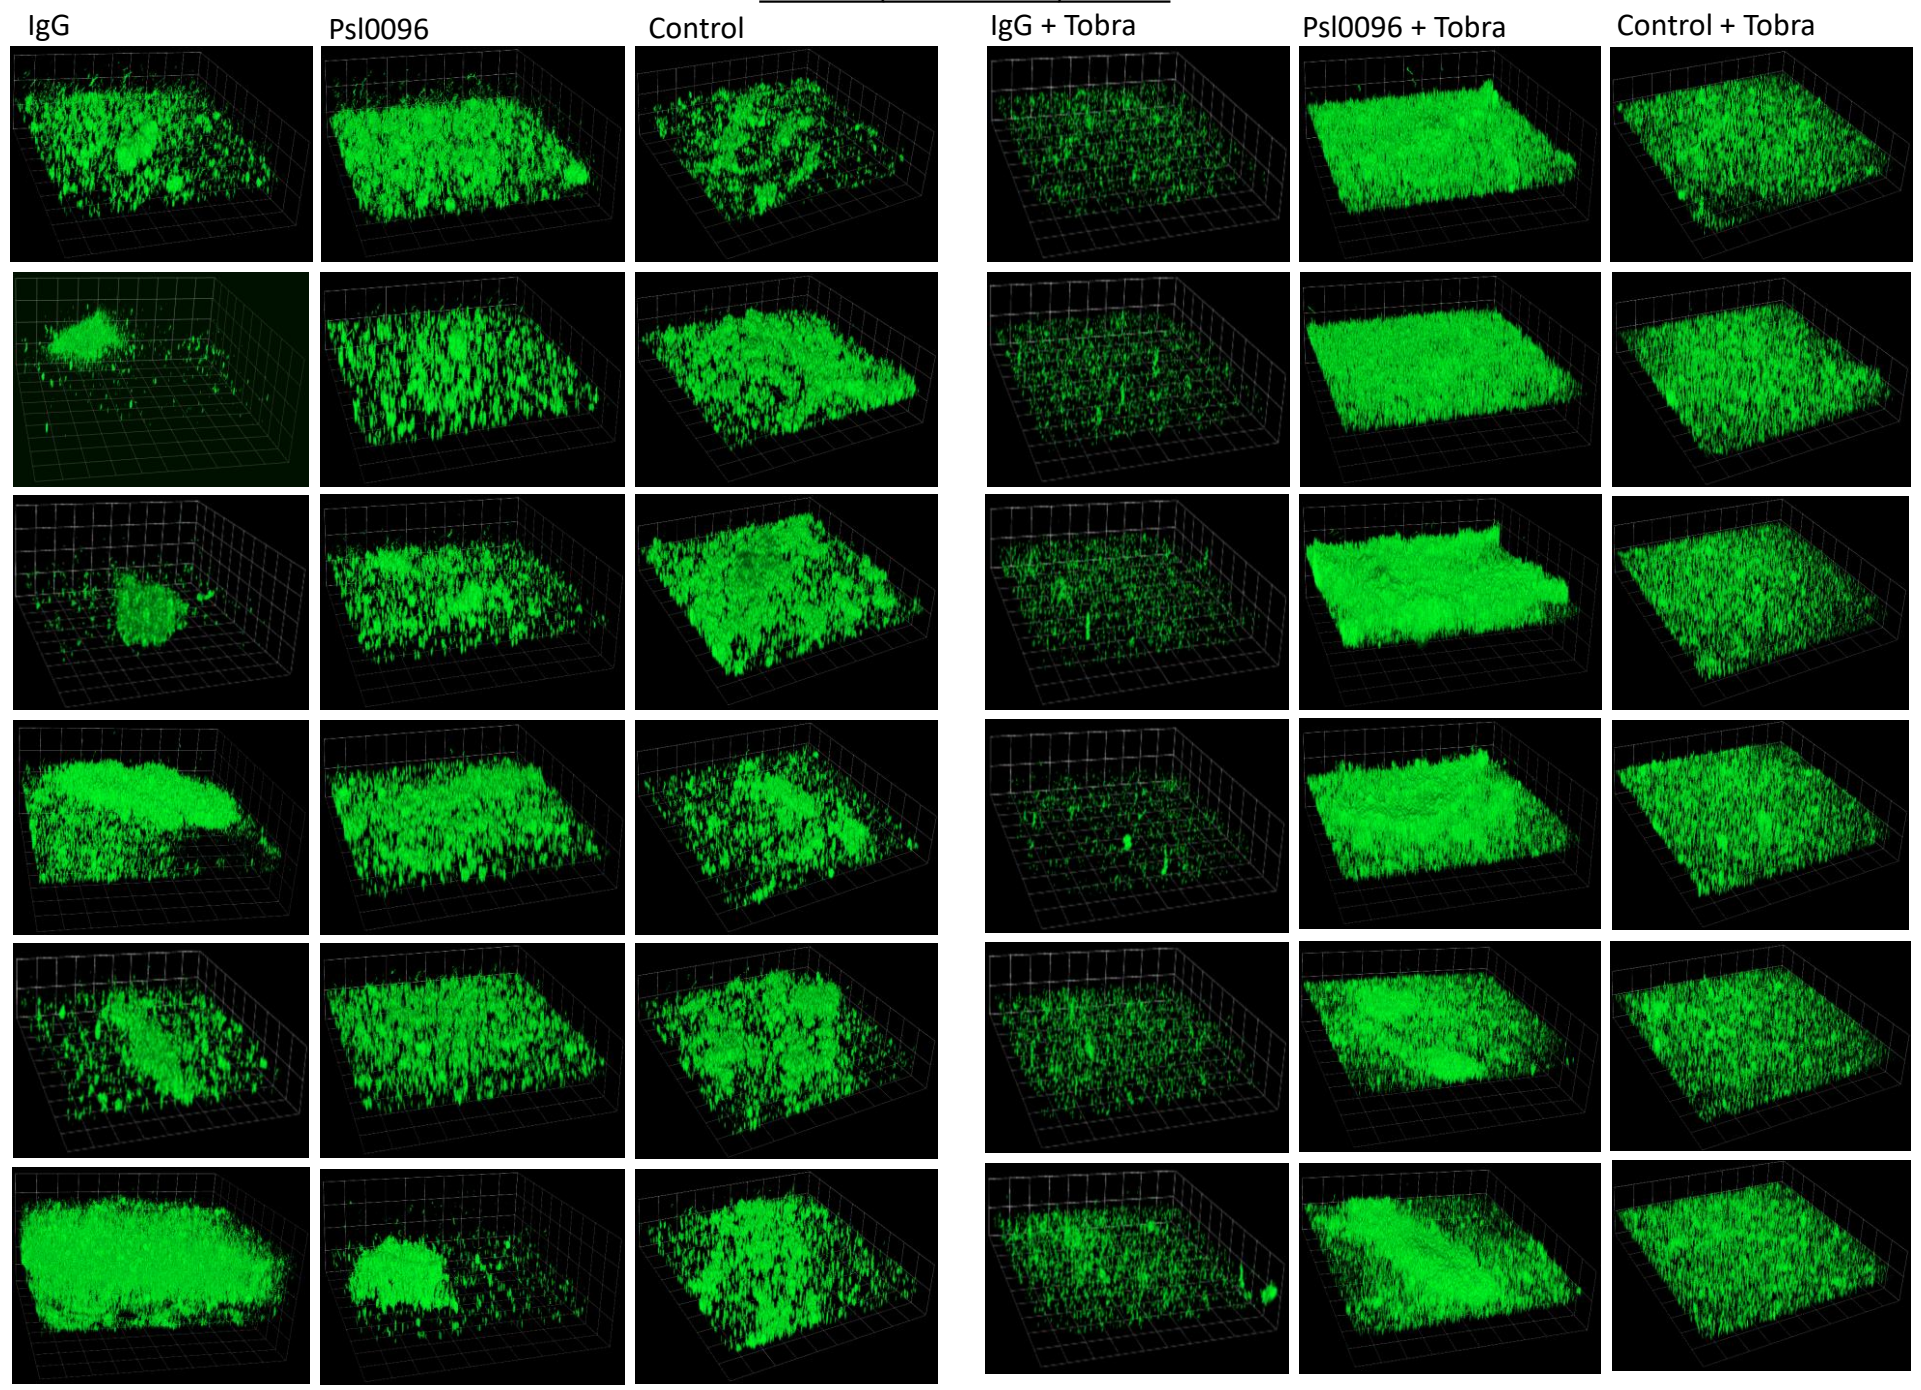



Pa565 (Persistent) Trial2

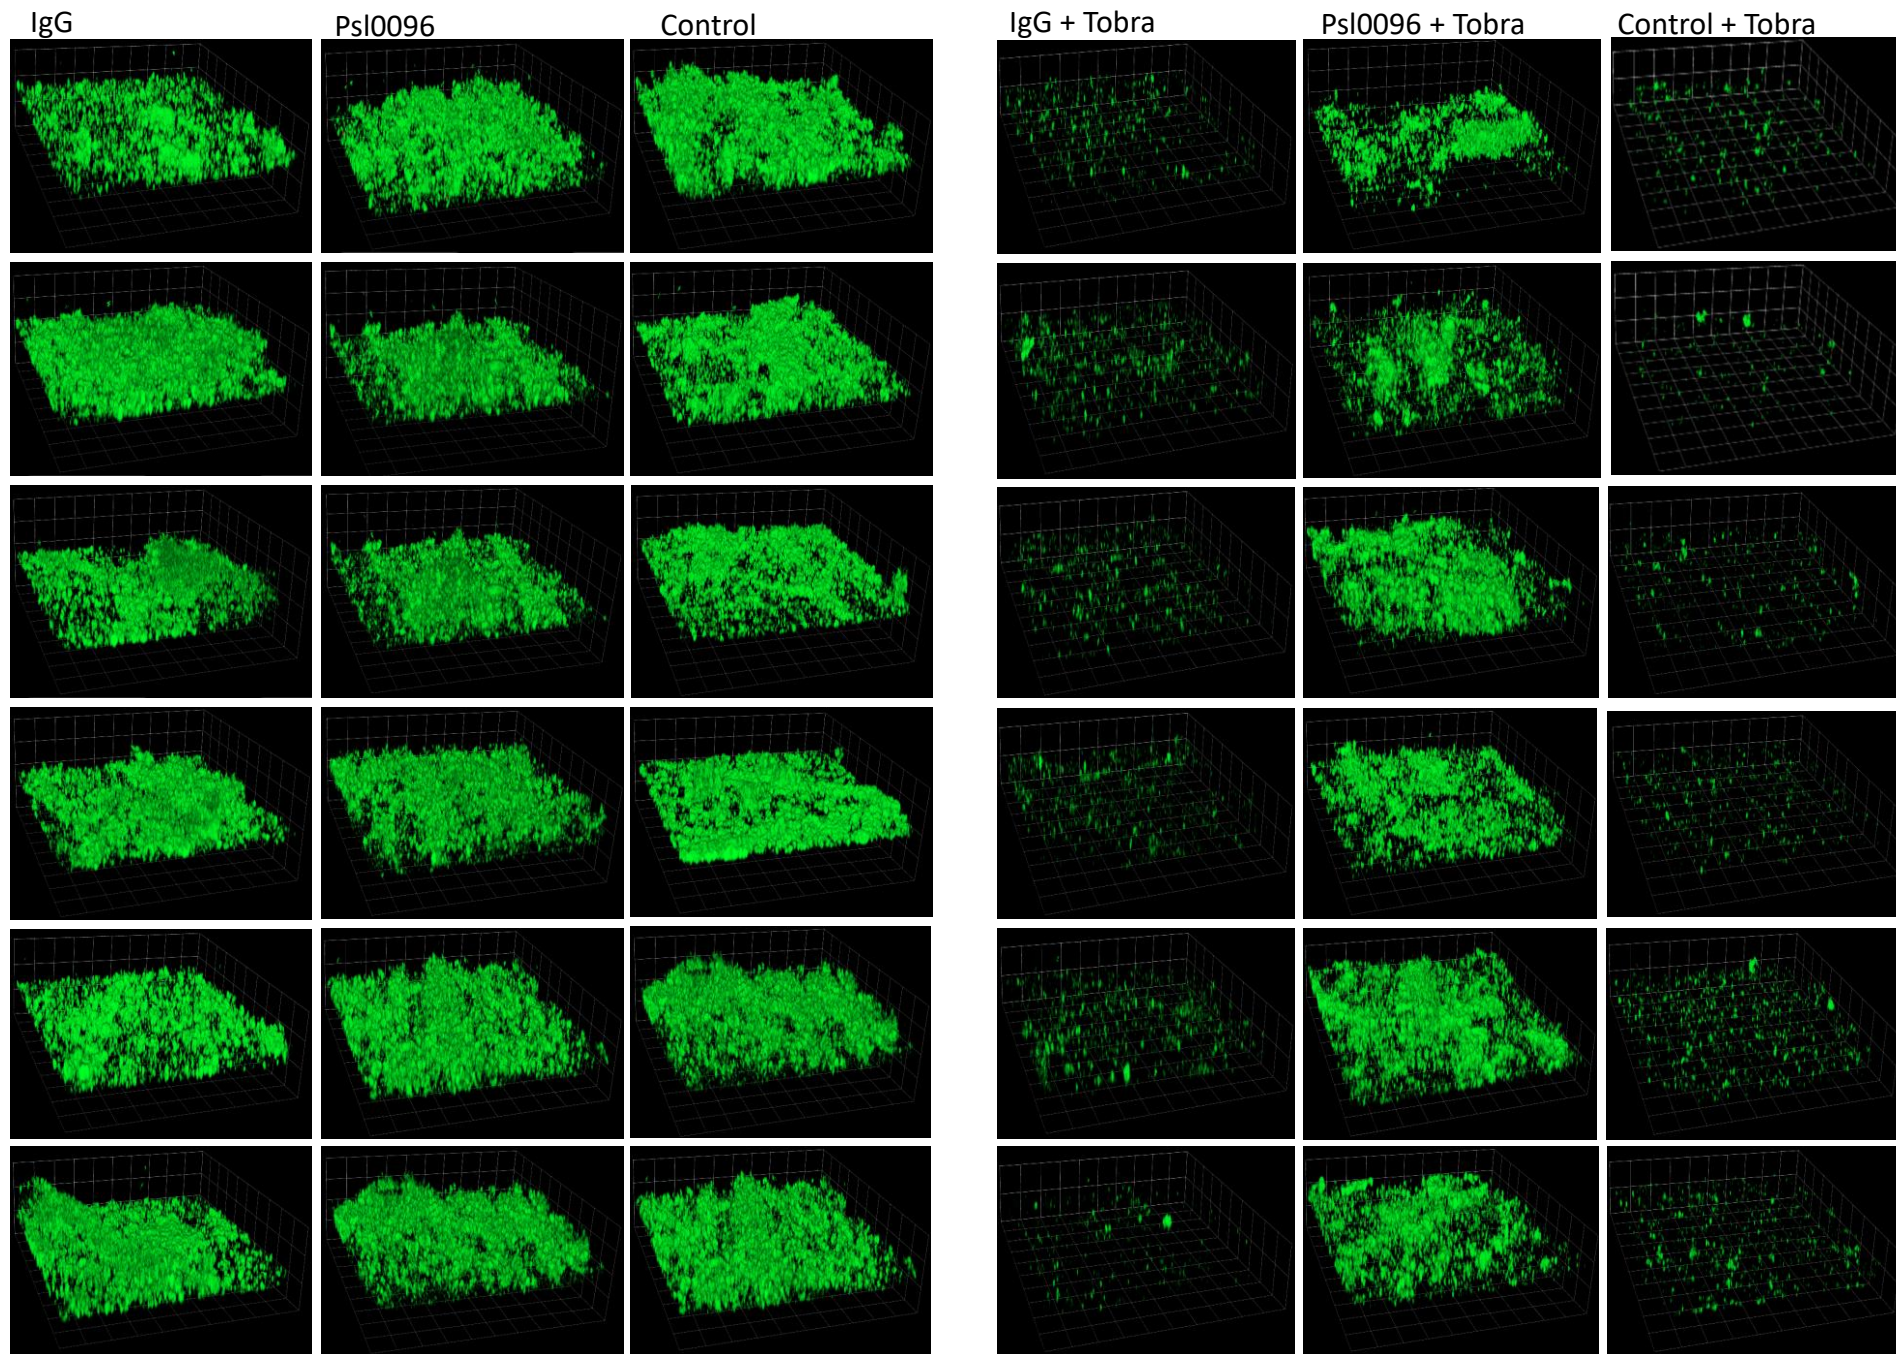



Pa565 (Persistent) Trial3

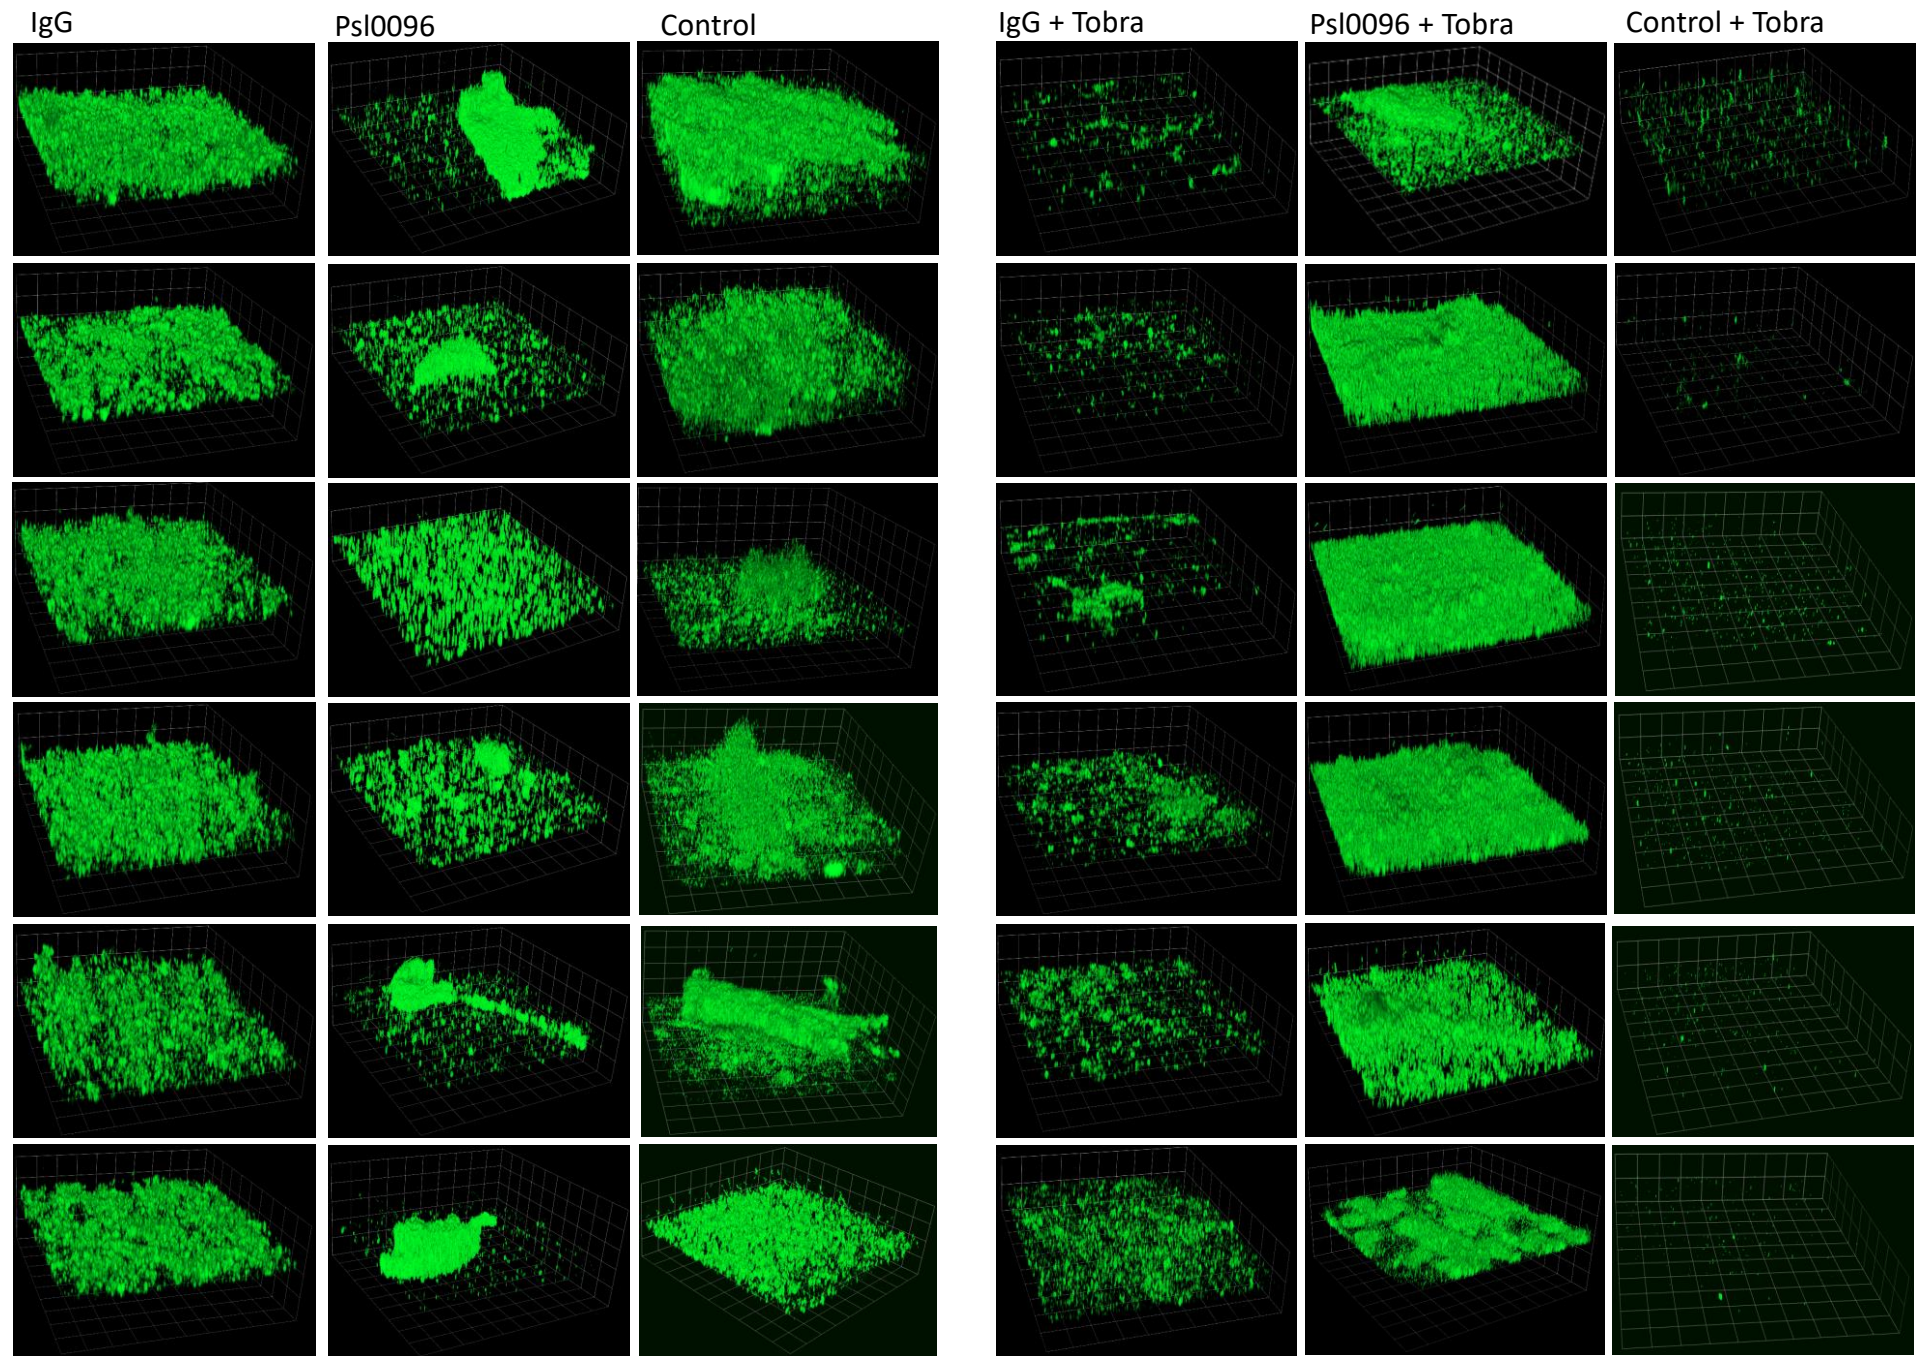



Pa580 (Persistent) Trial1

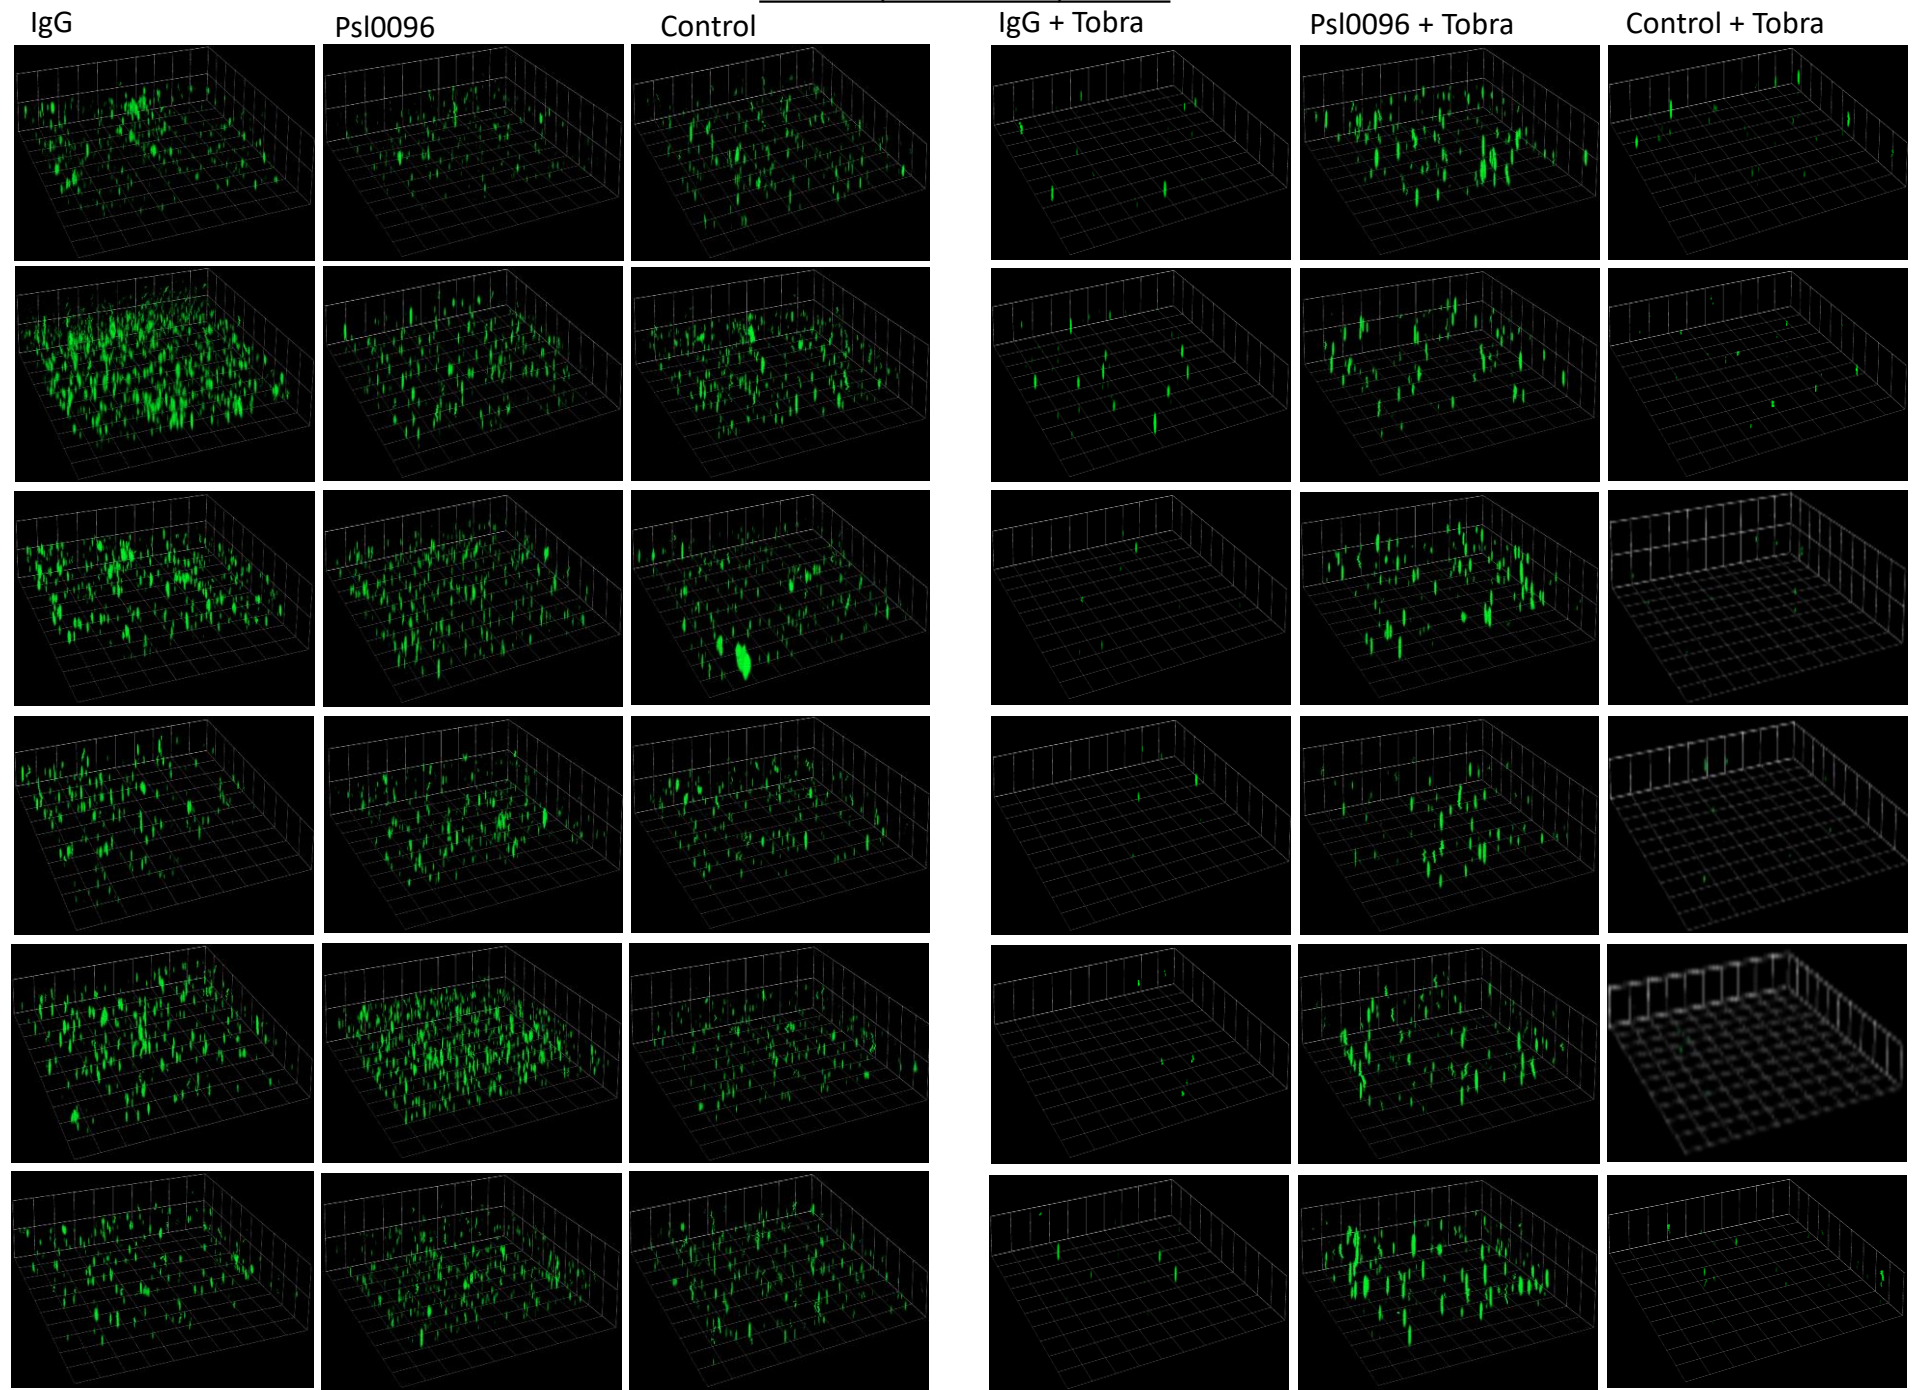



Pa580 (Persistent) Trial2

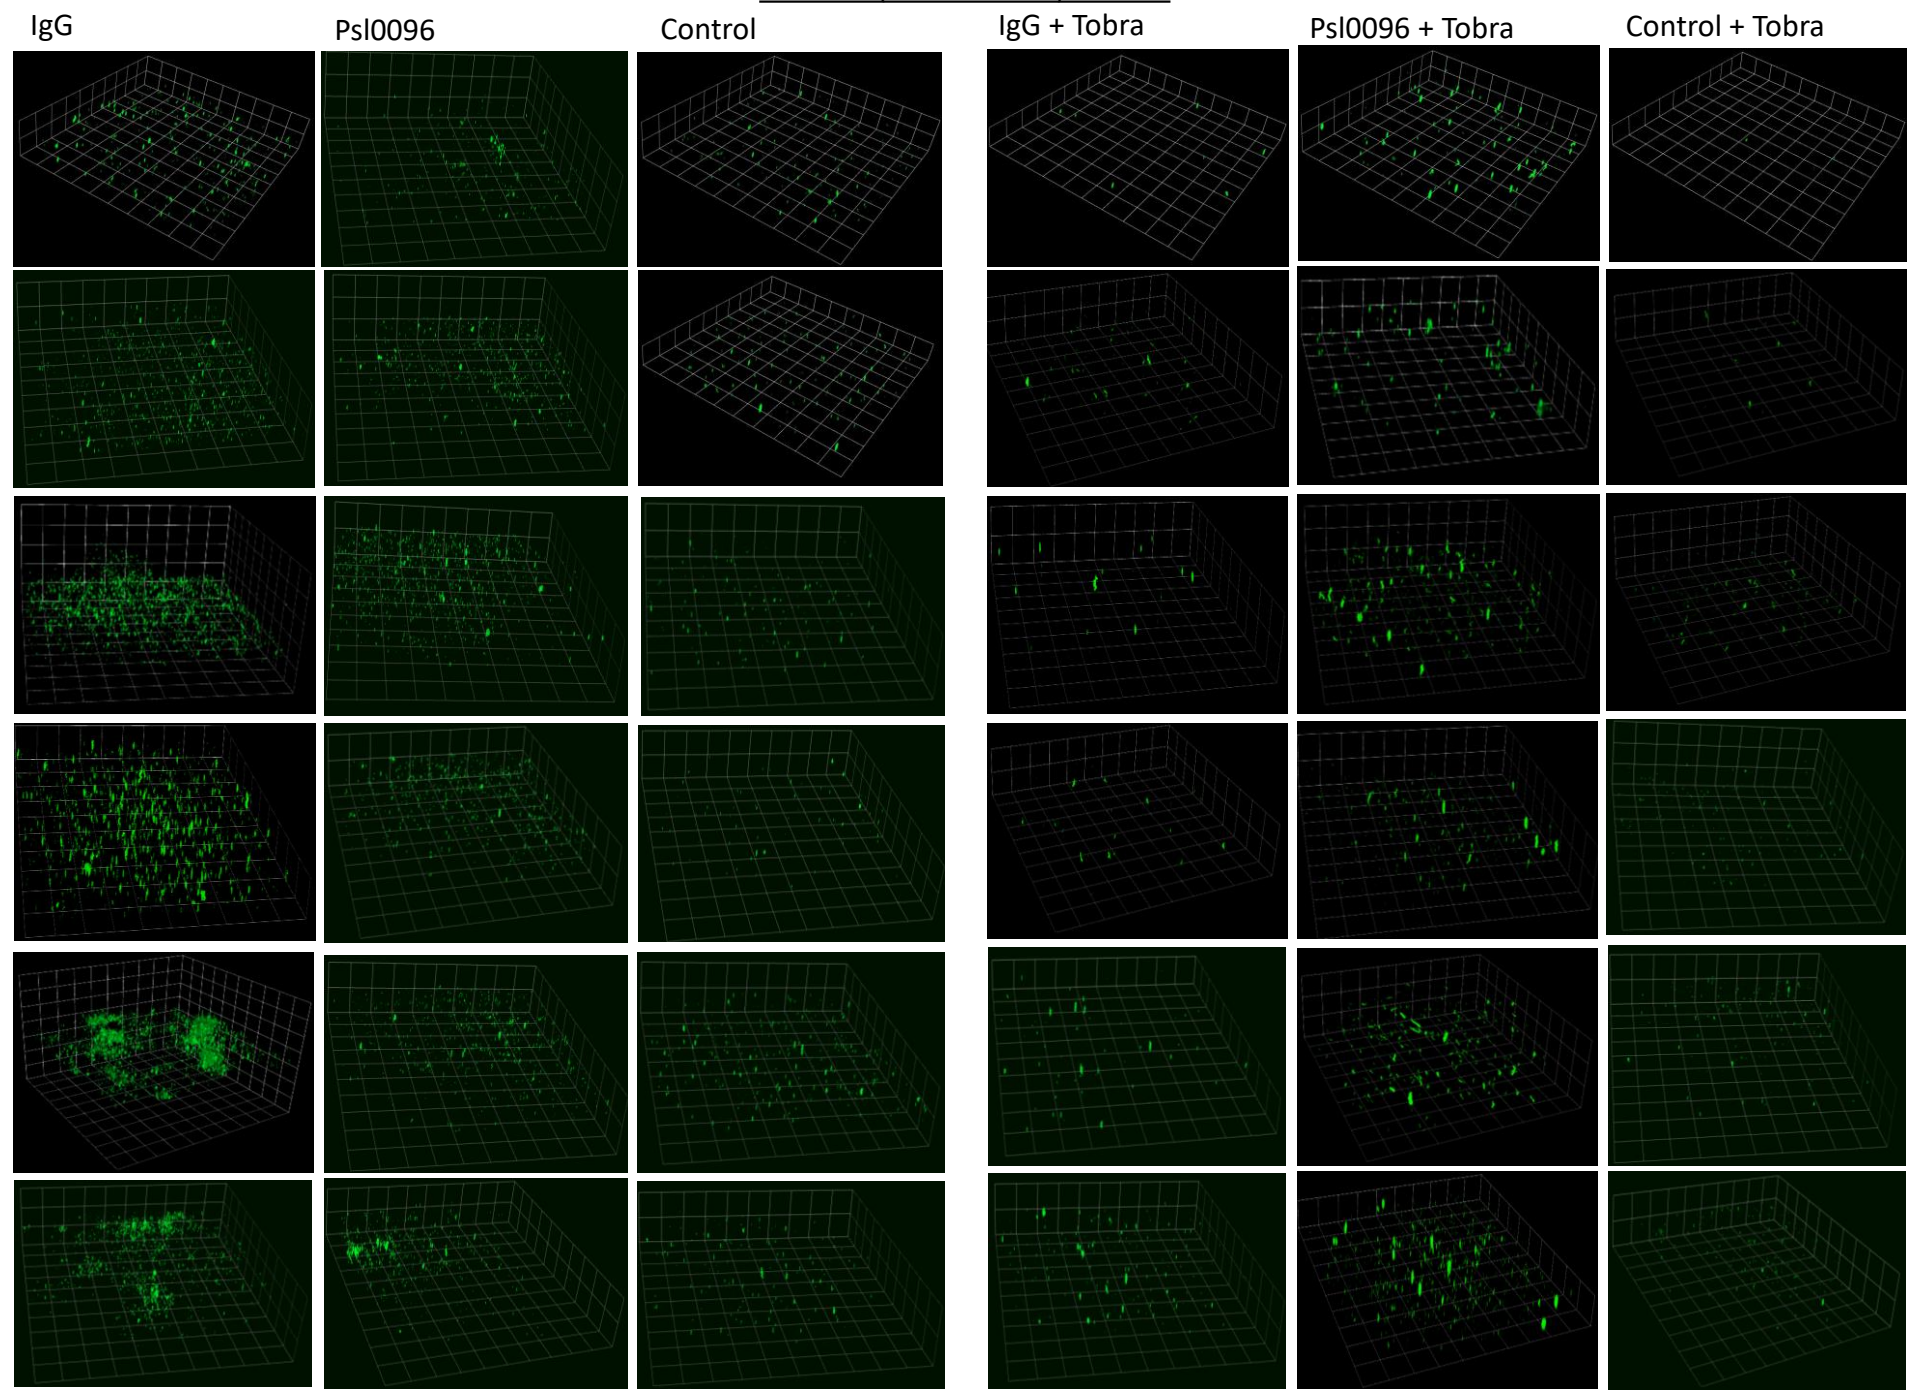



Pa580 (Persistent) Trial3

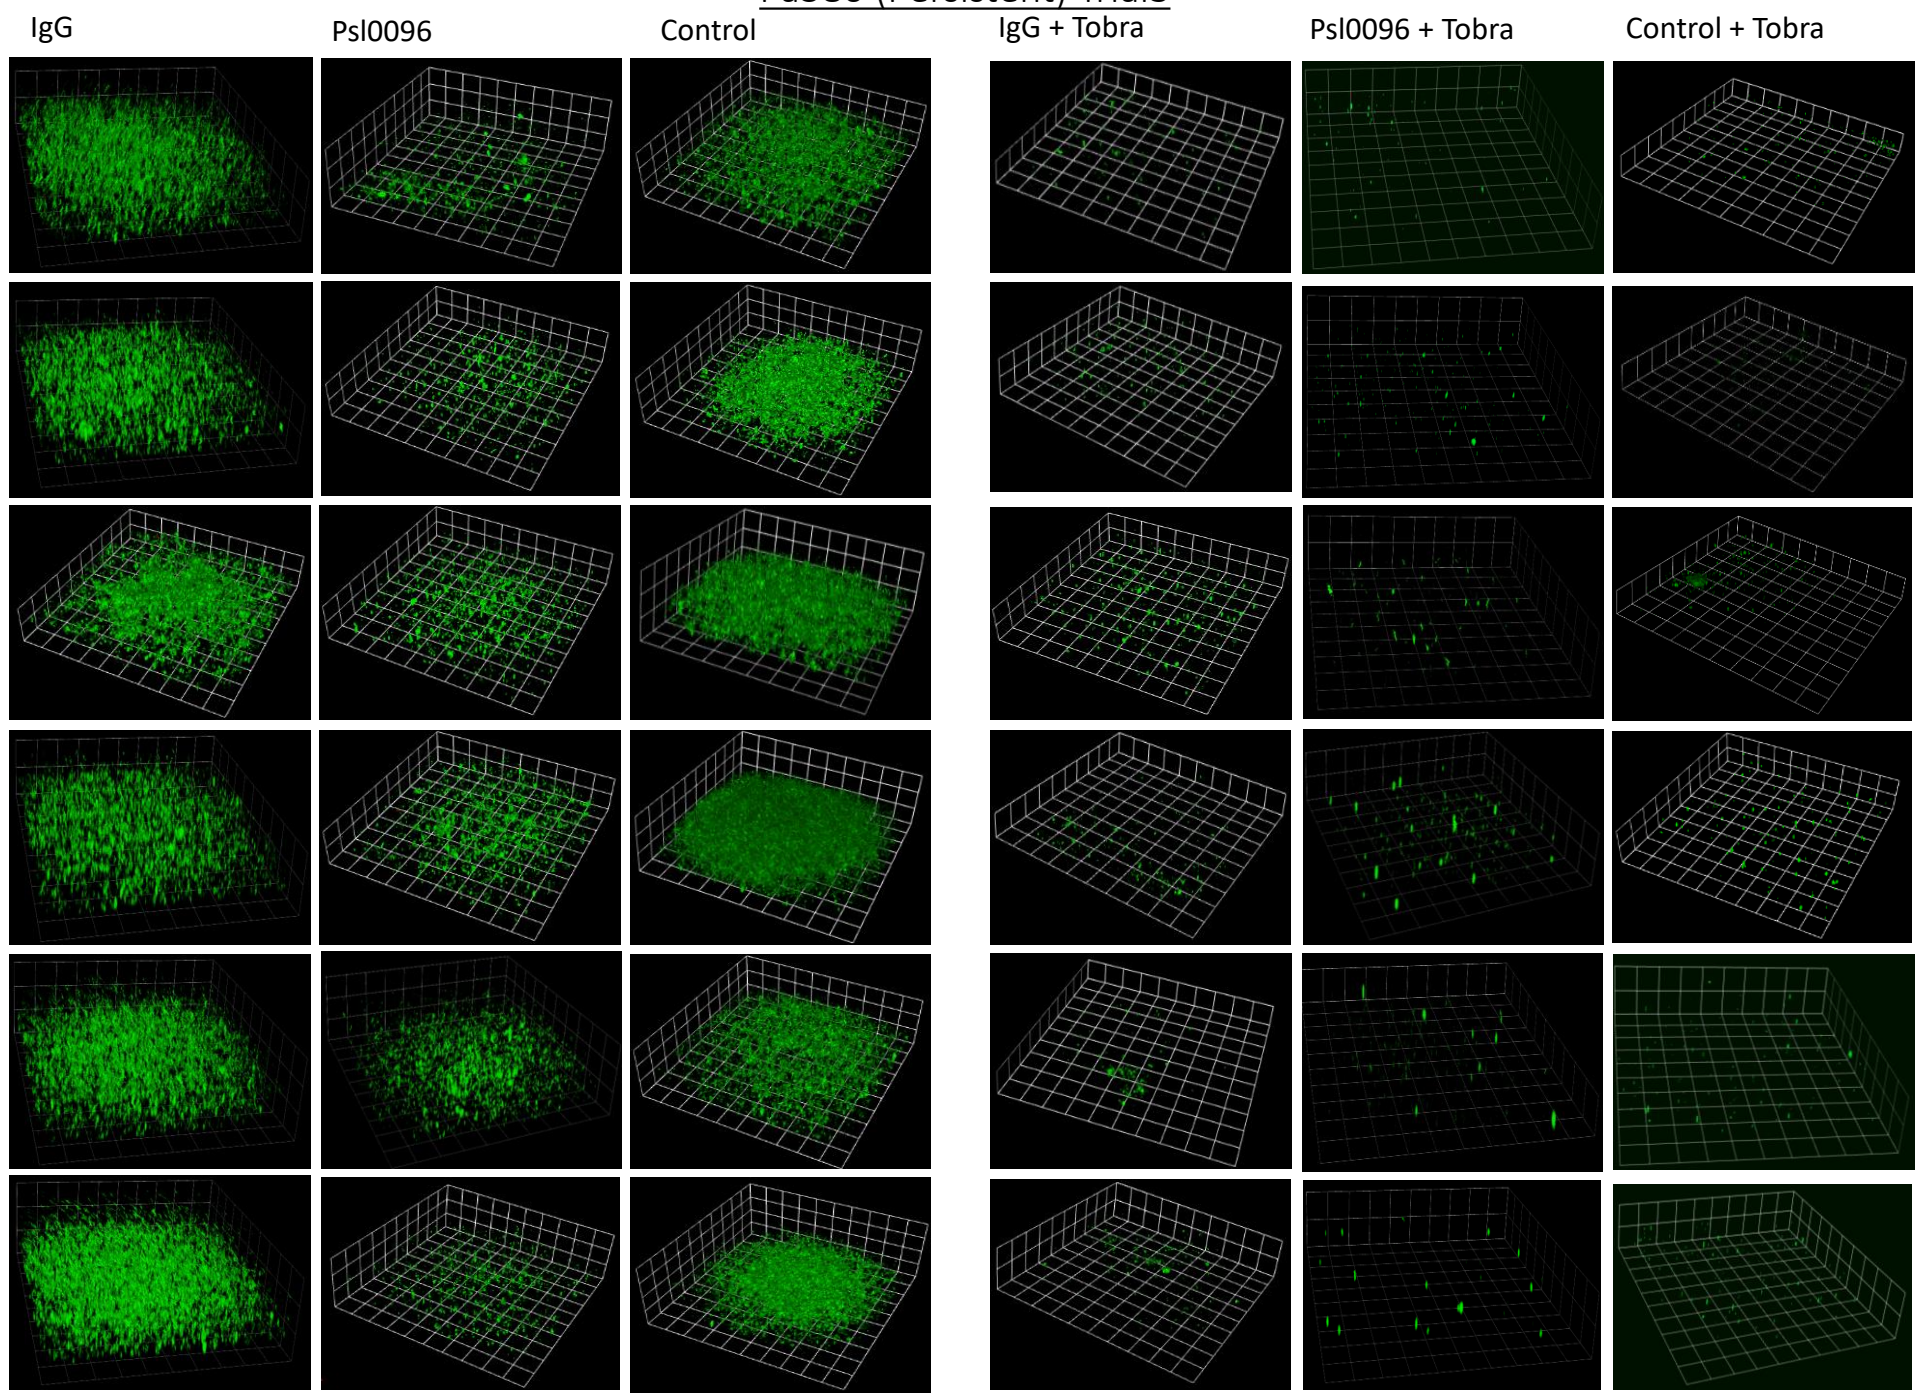



Pa505 (Persistent) Trial1

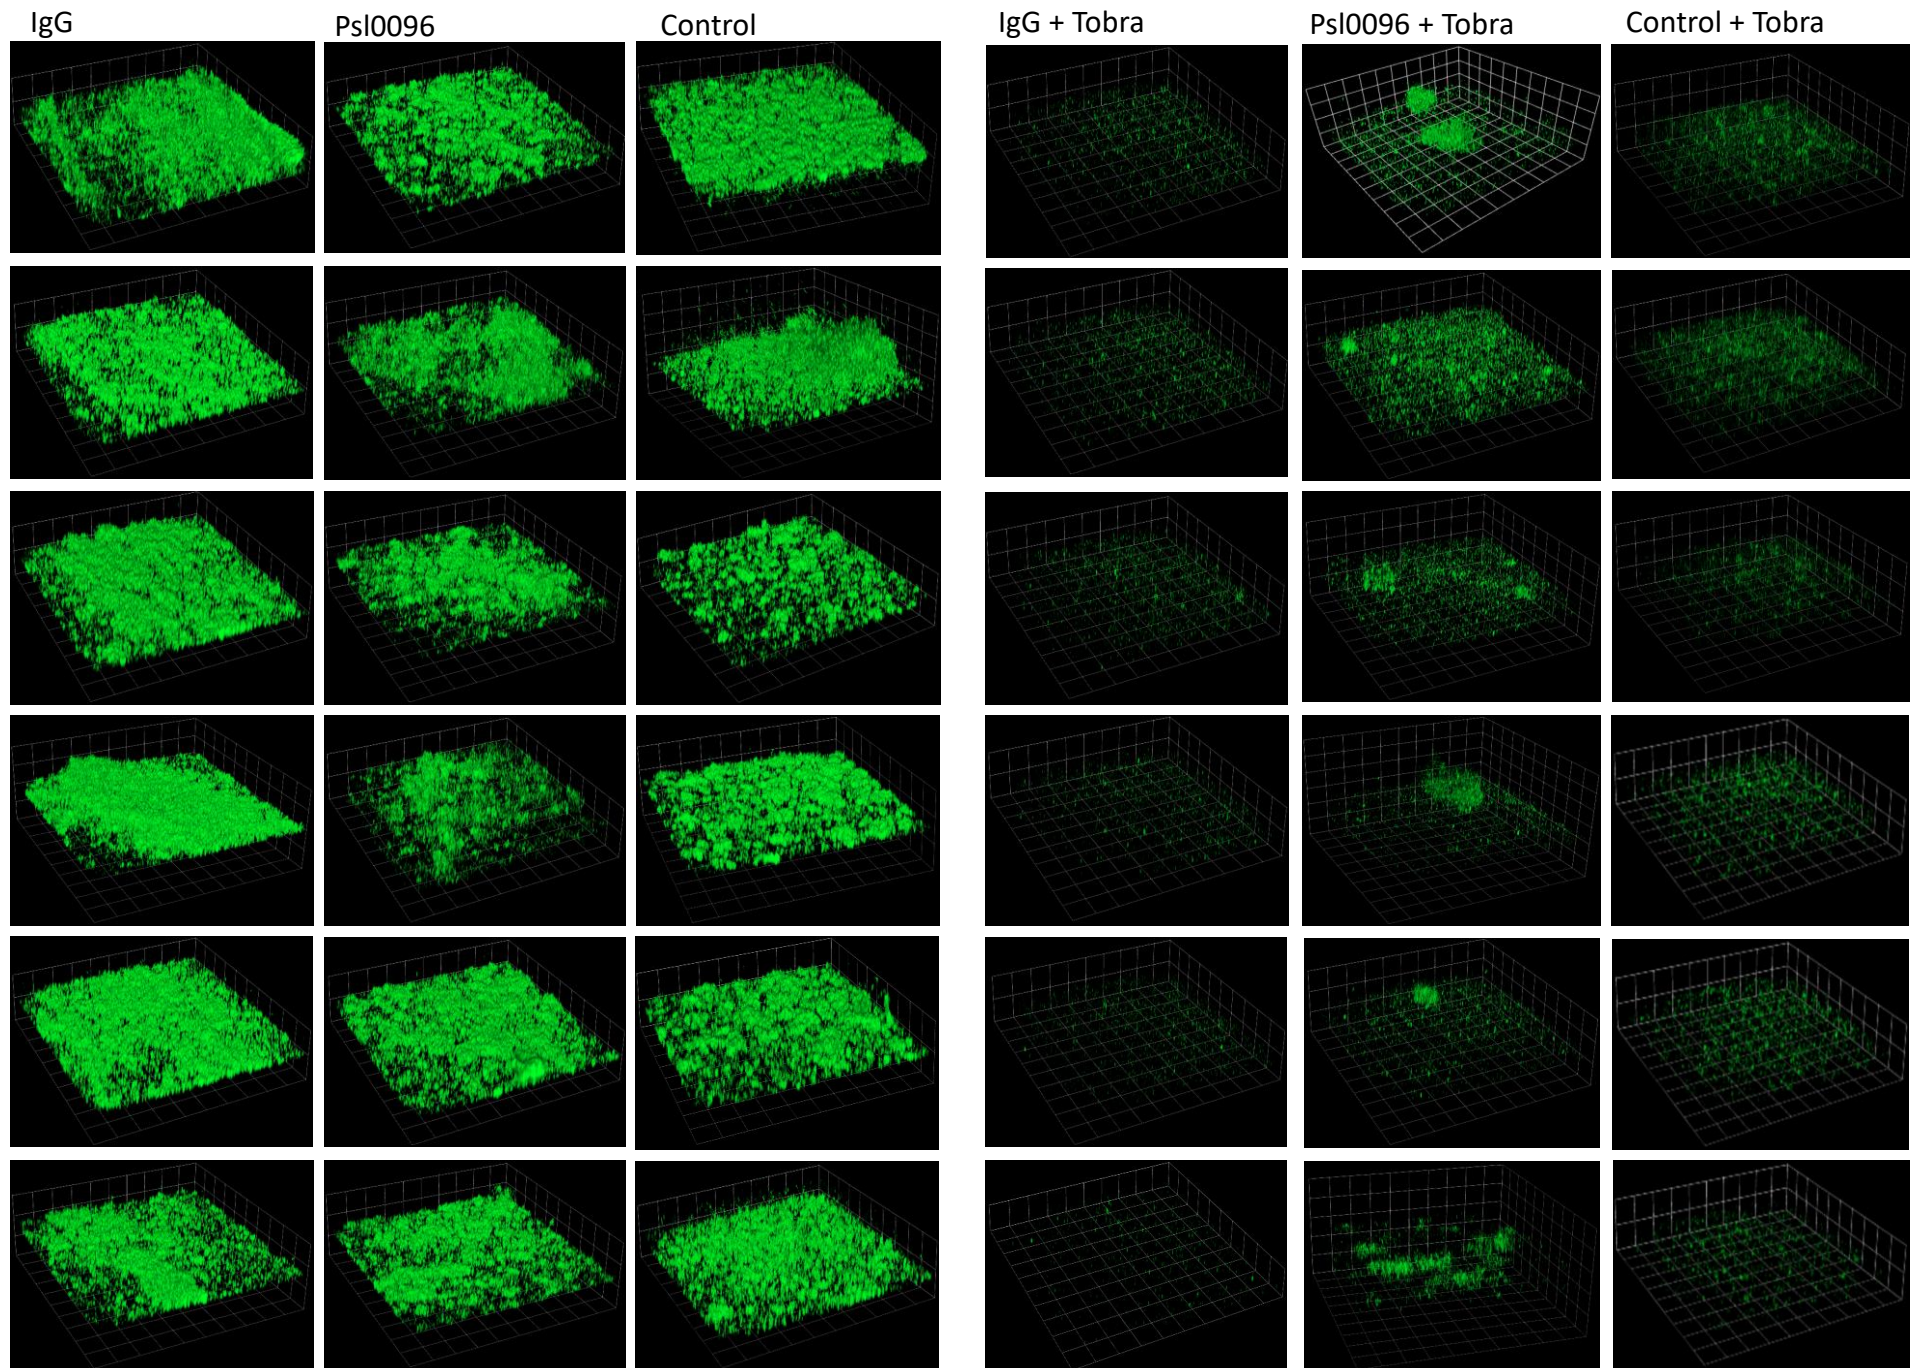



Pa505 (Persistent) Trial2

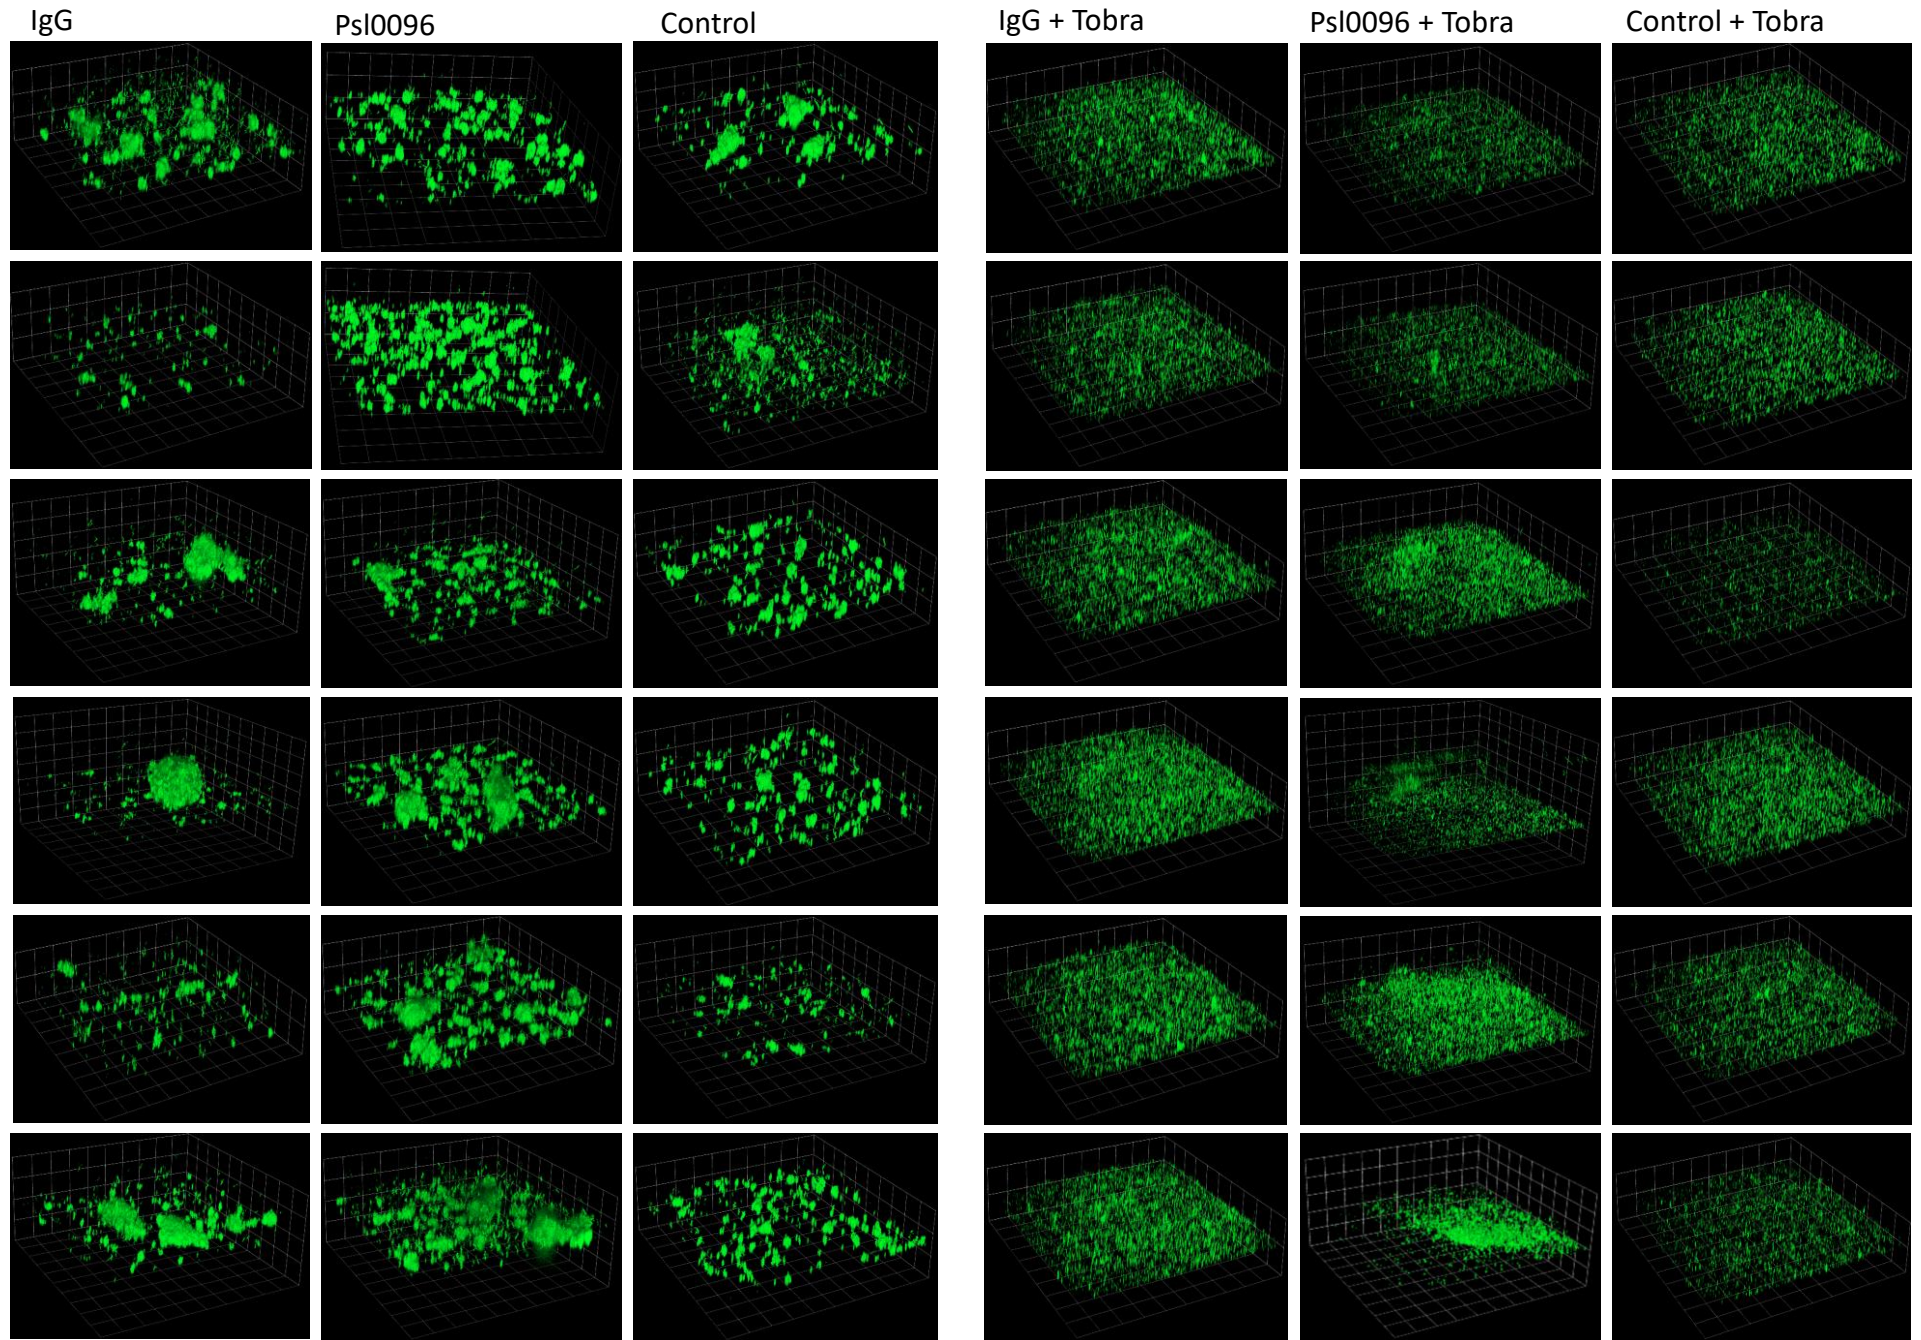



Pa505 (Persistent) Trial3

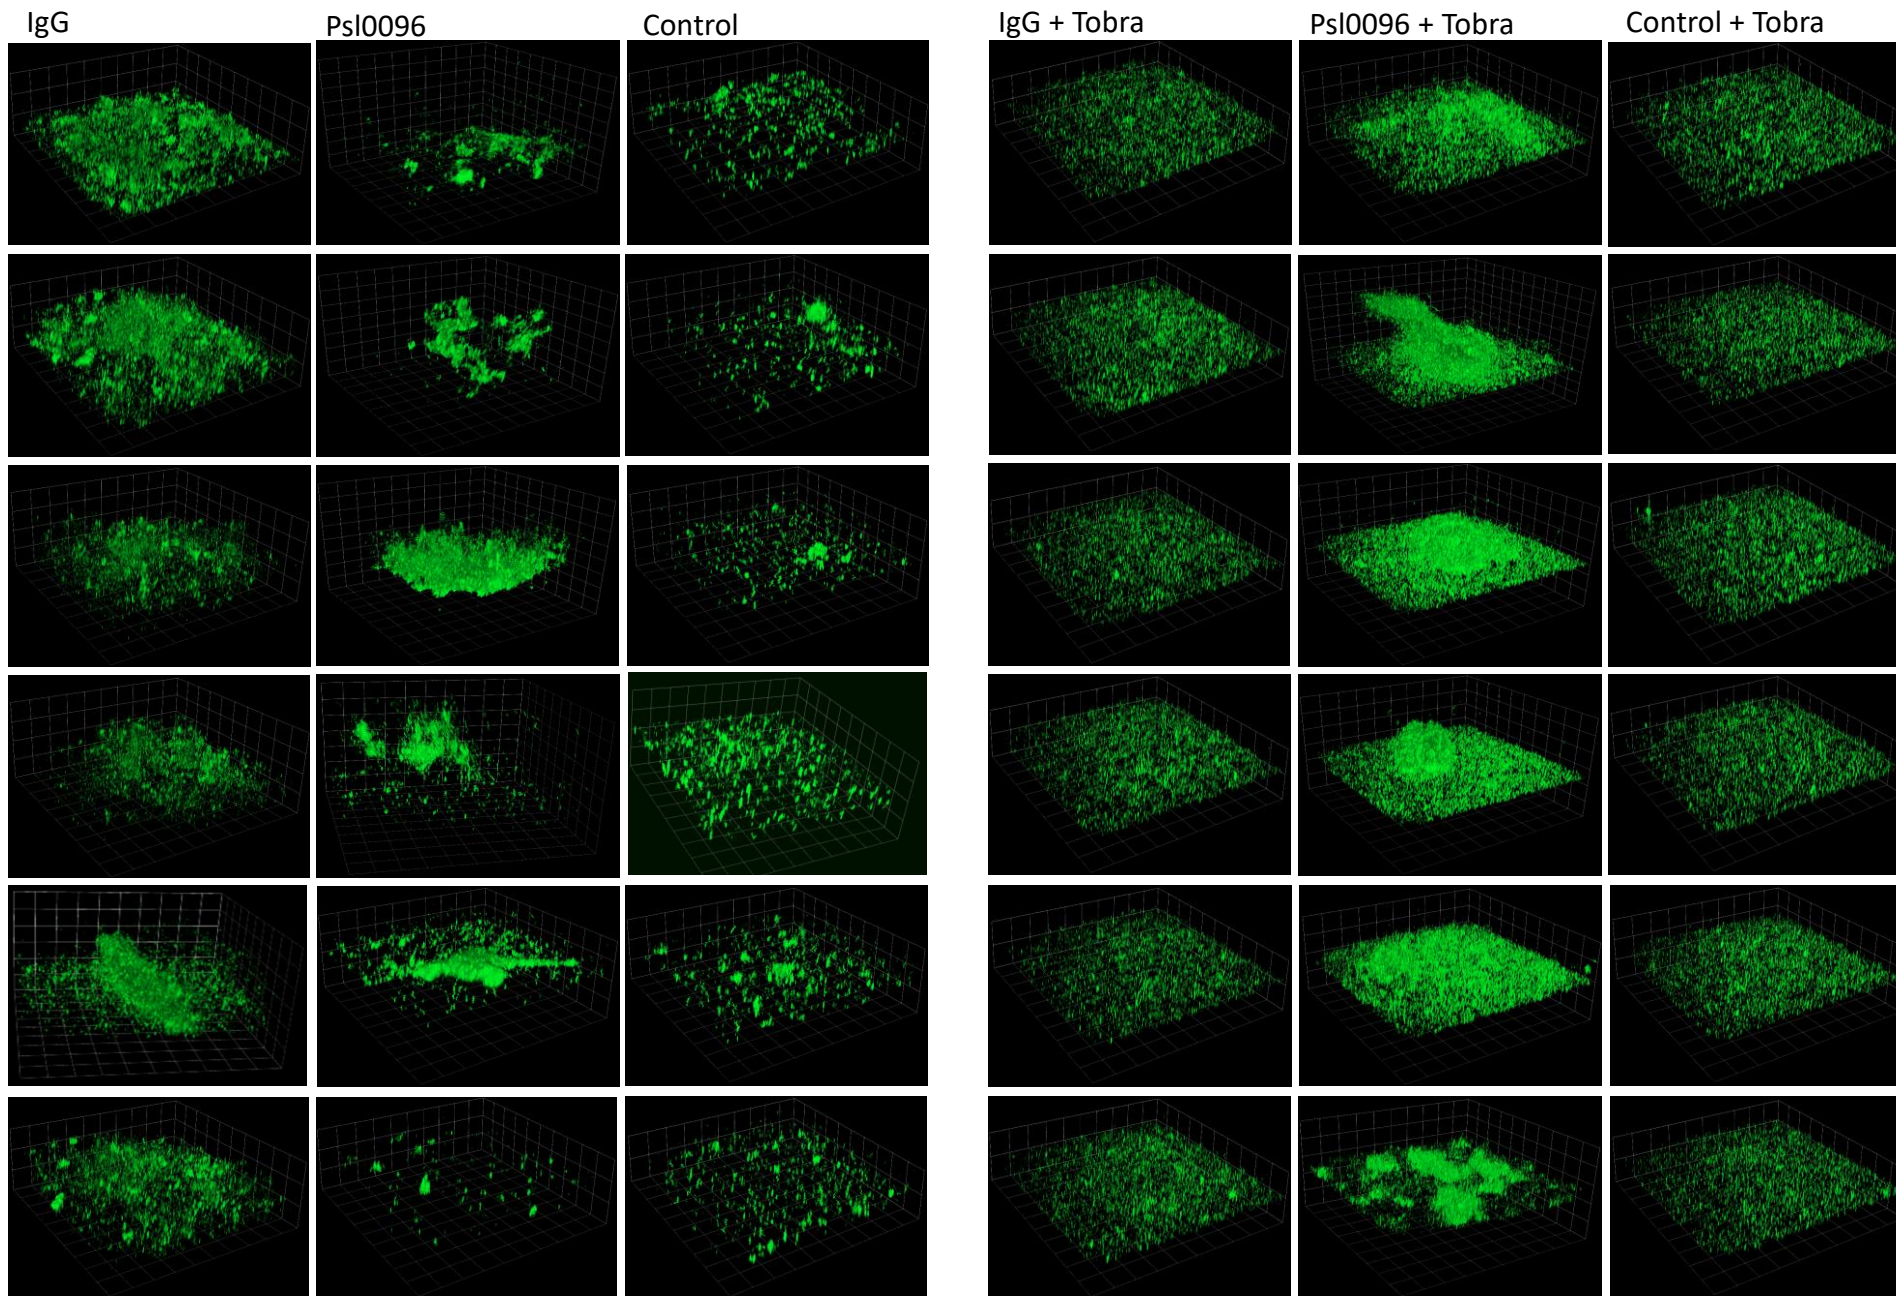



Pa551 (Persistent) Trial1

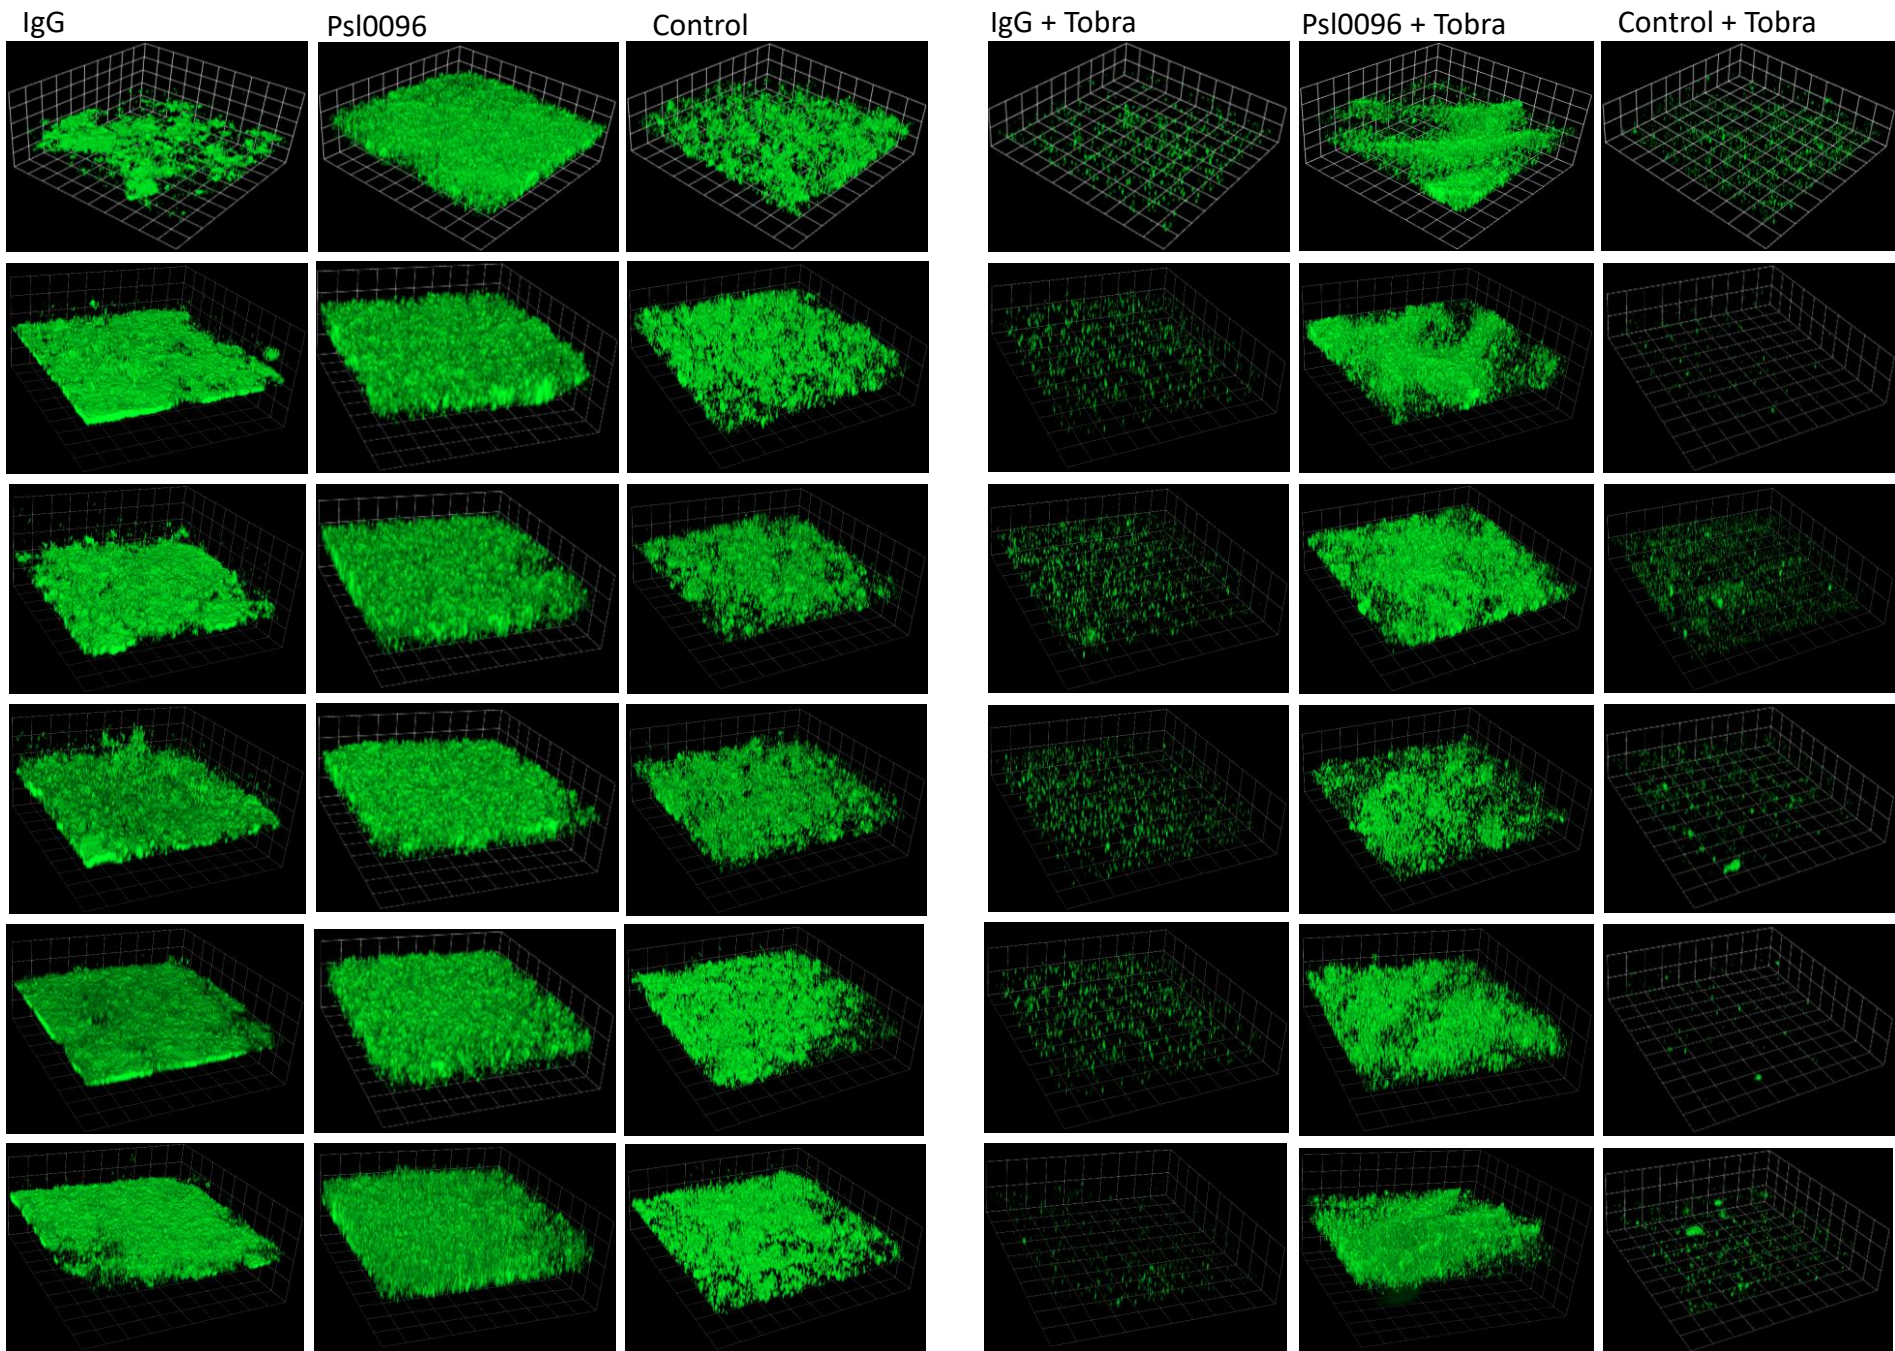



Pa551 (Persistent) Trial2

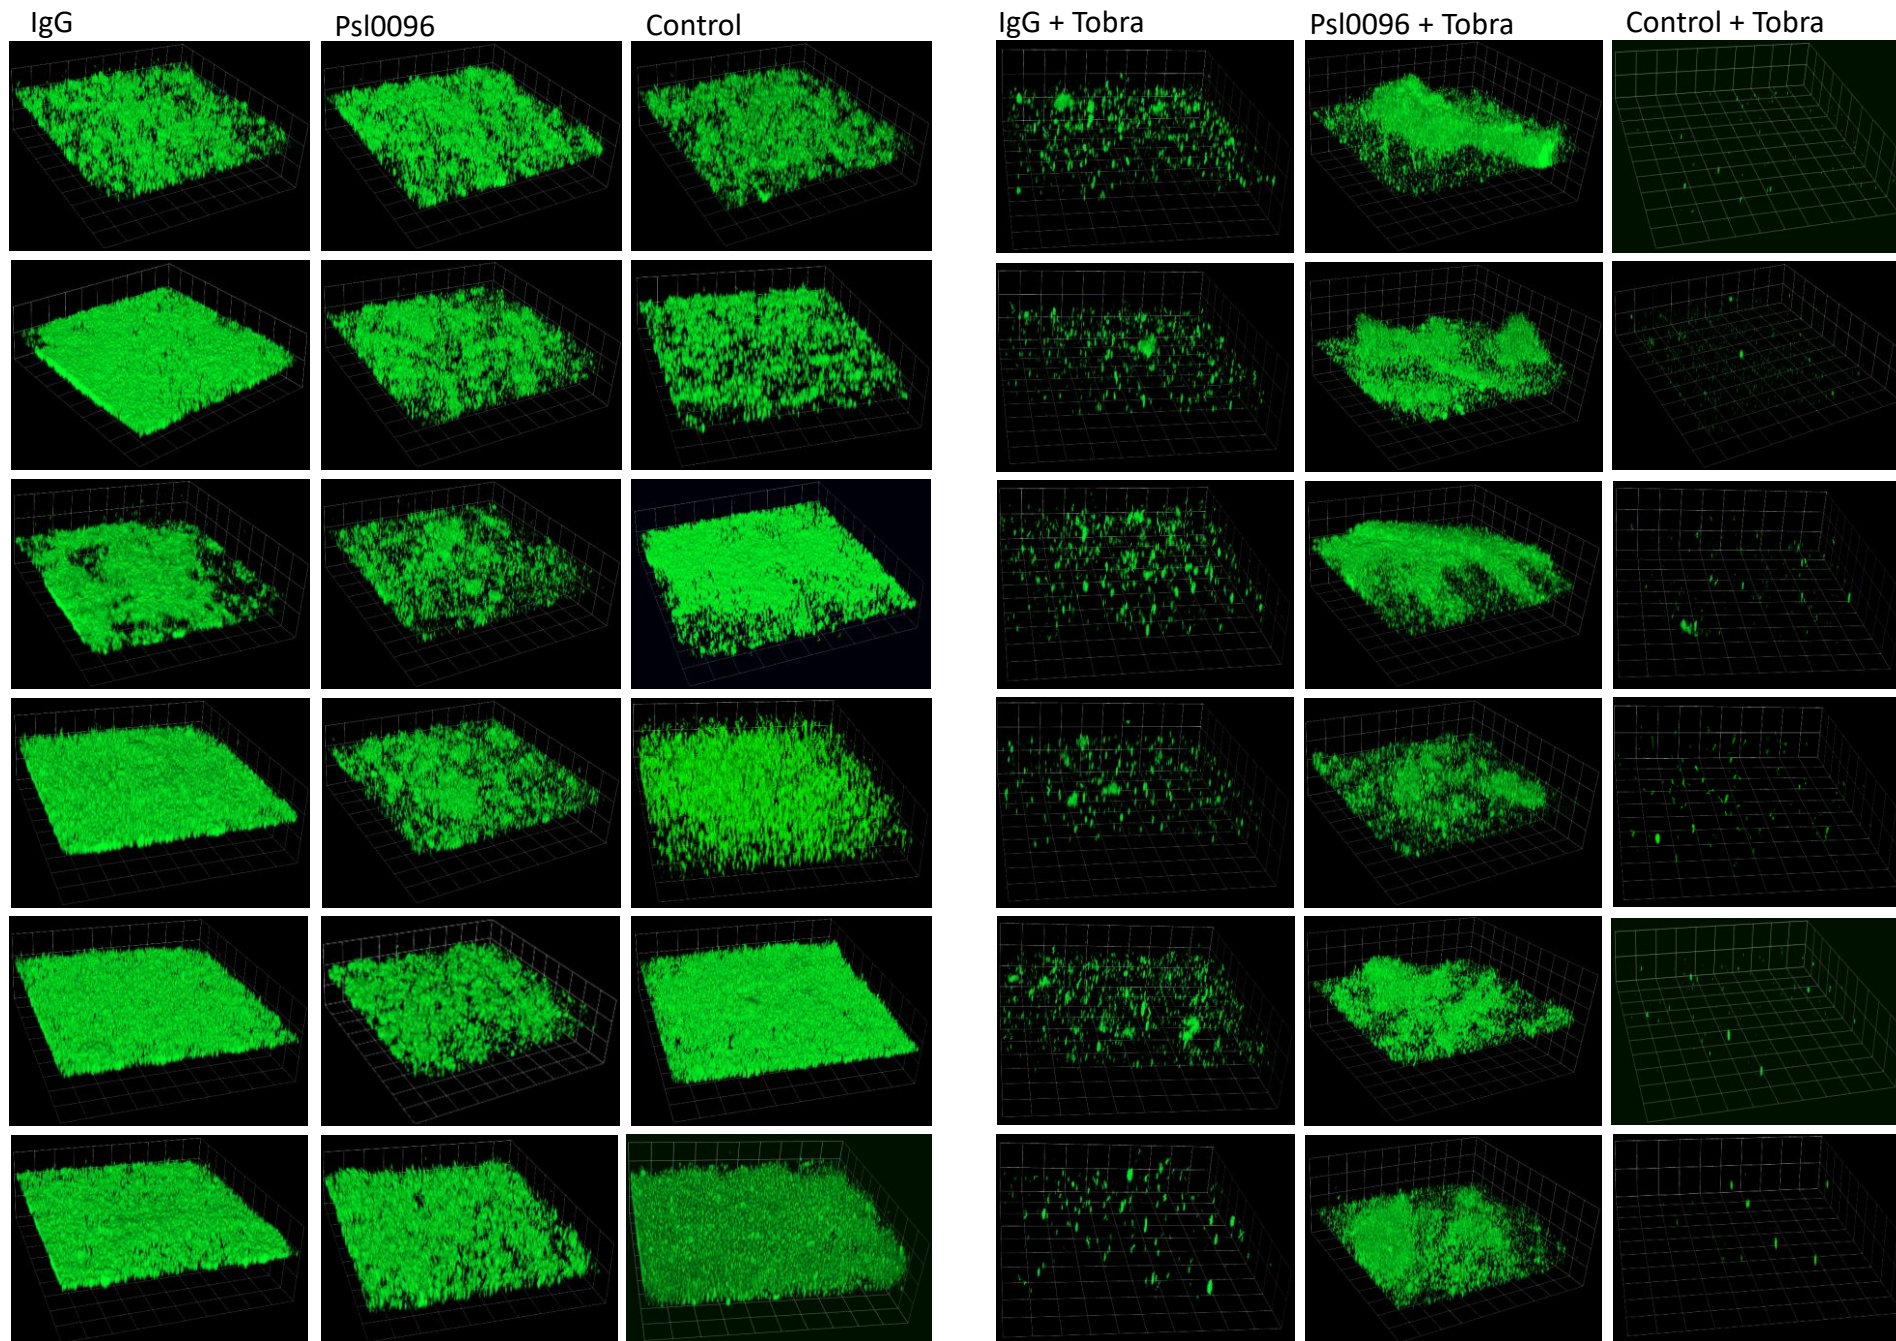



Pa551 (Persistent) Trial3

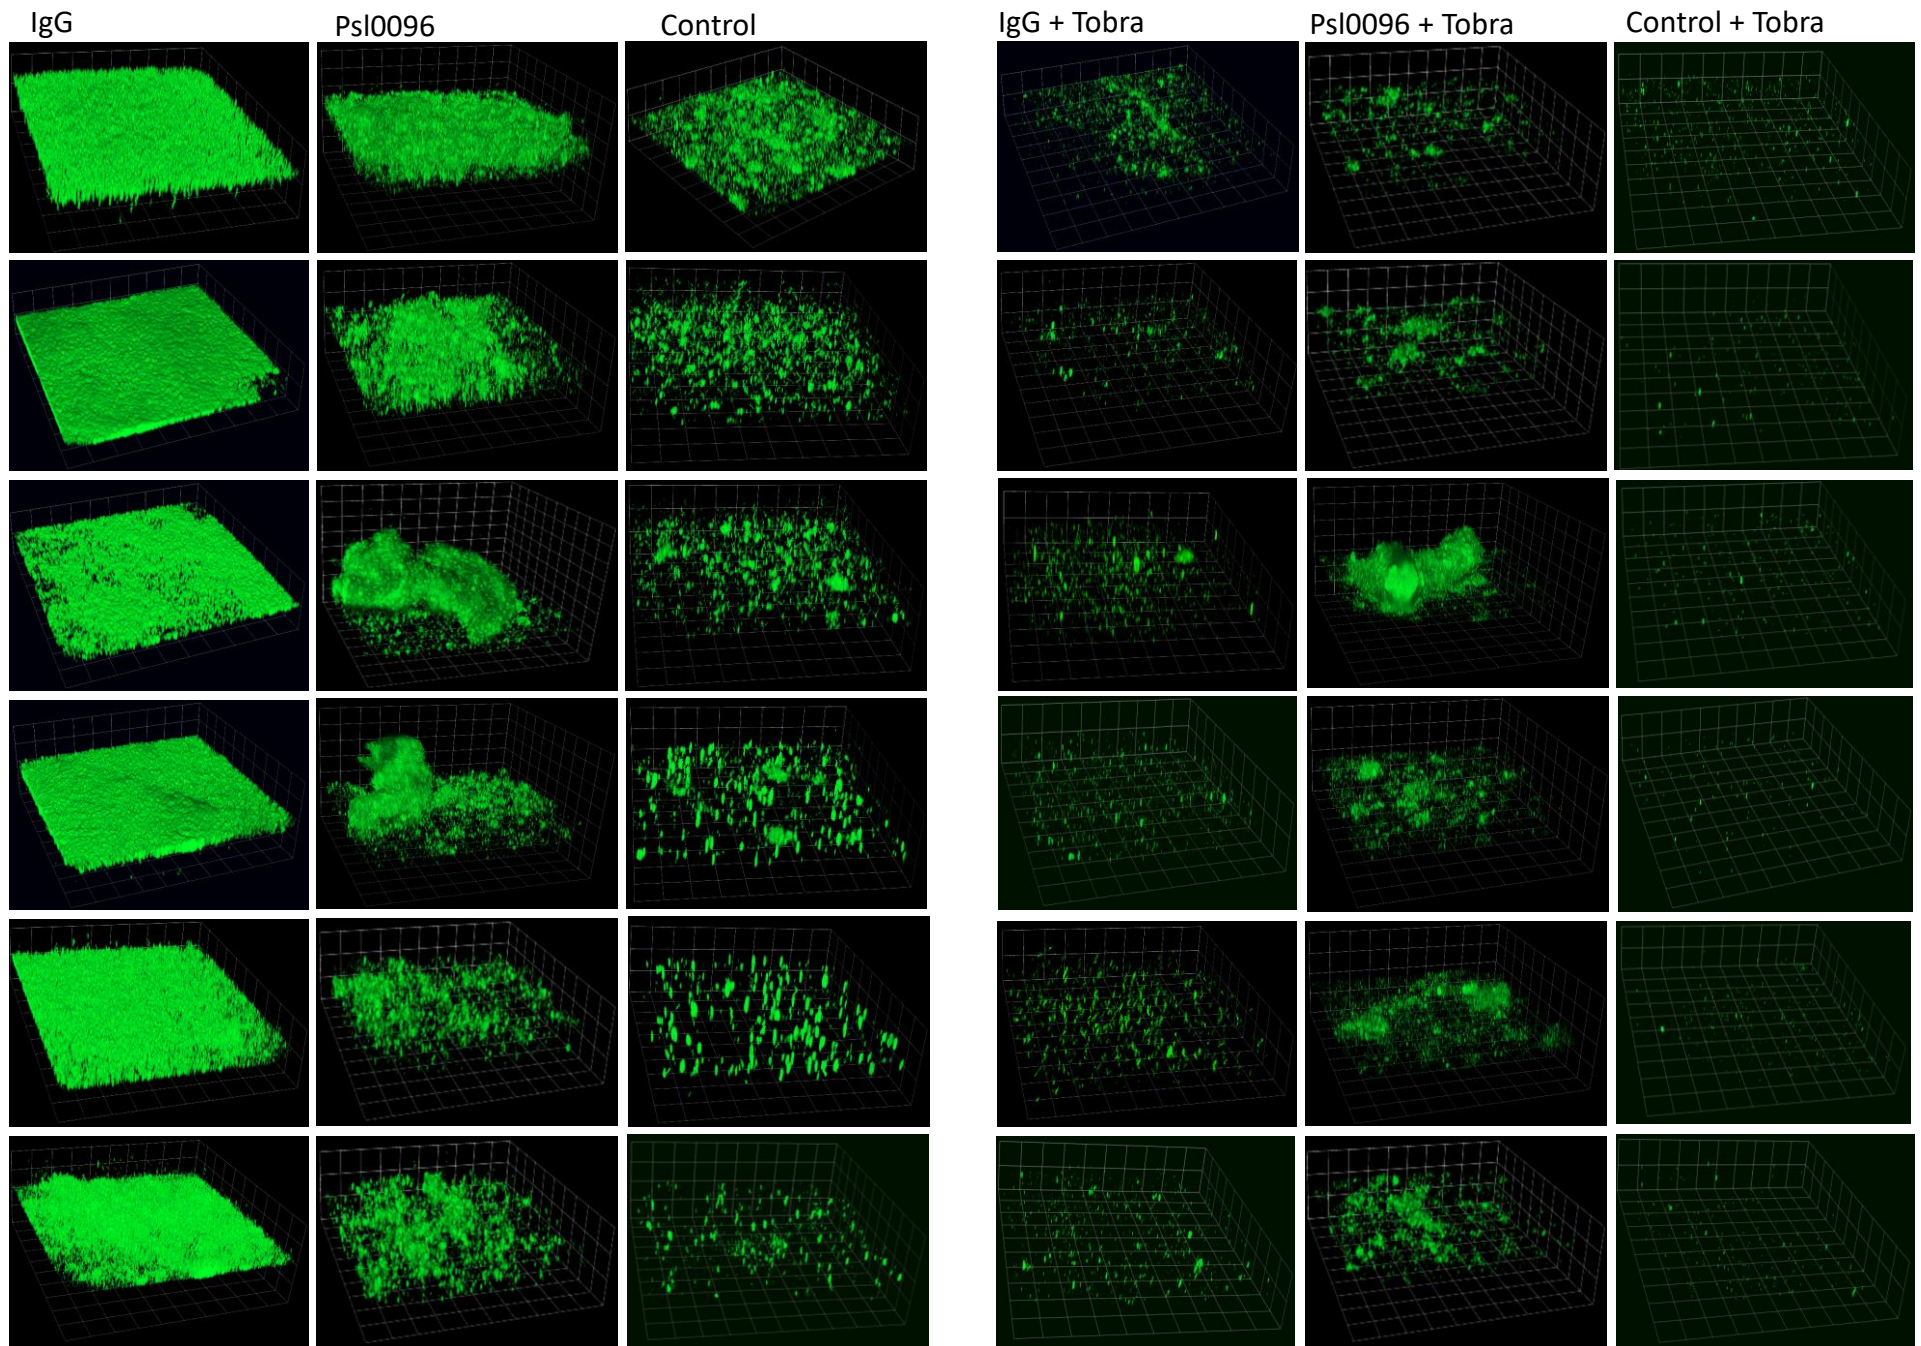



Pa549 (Eradicated) Trial1

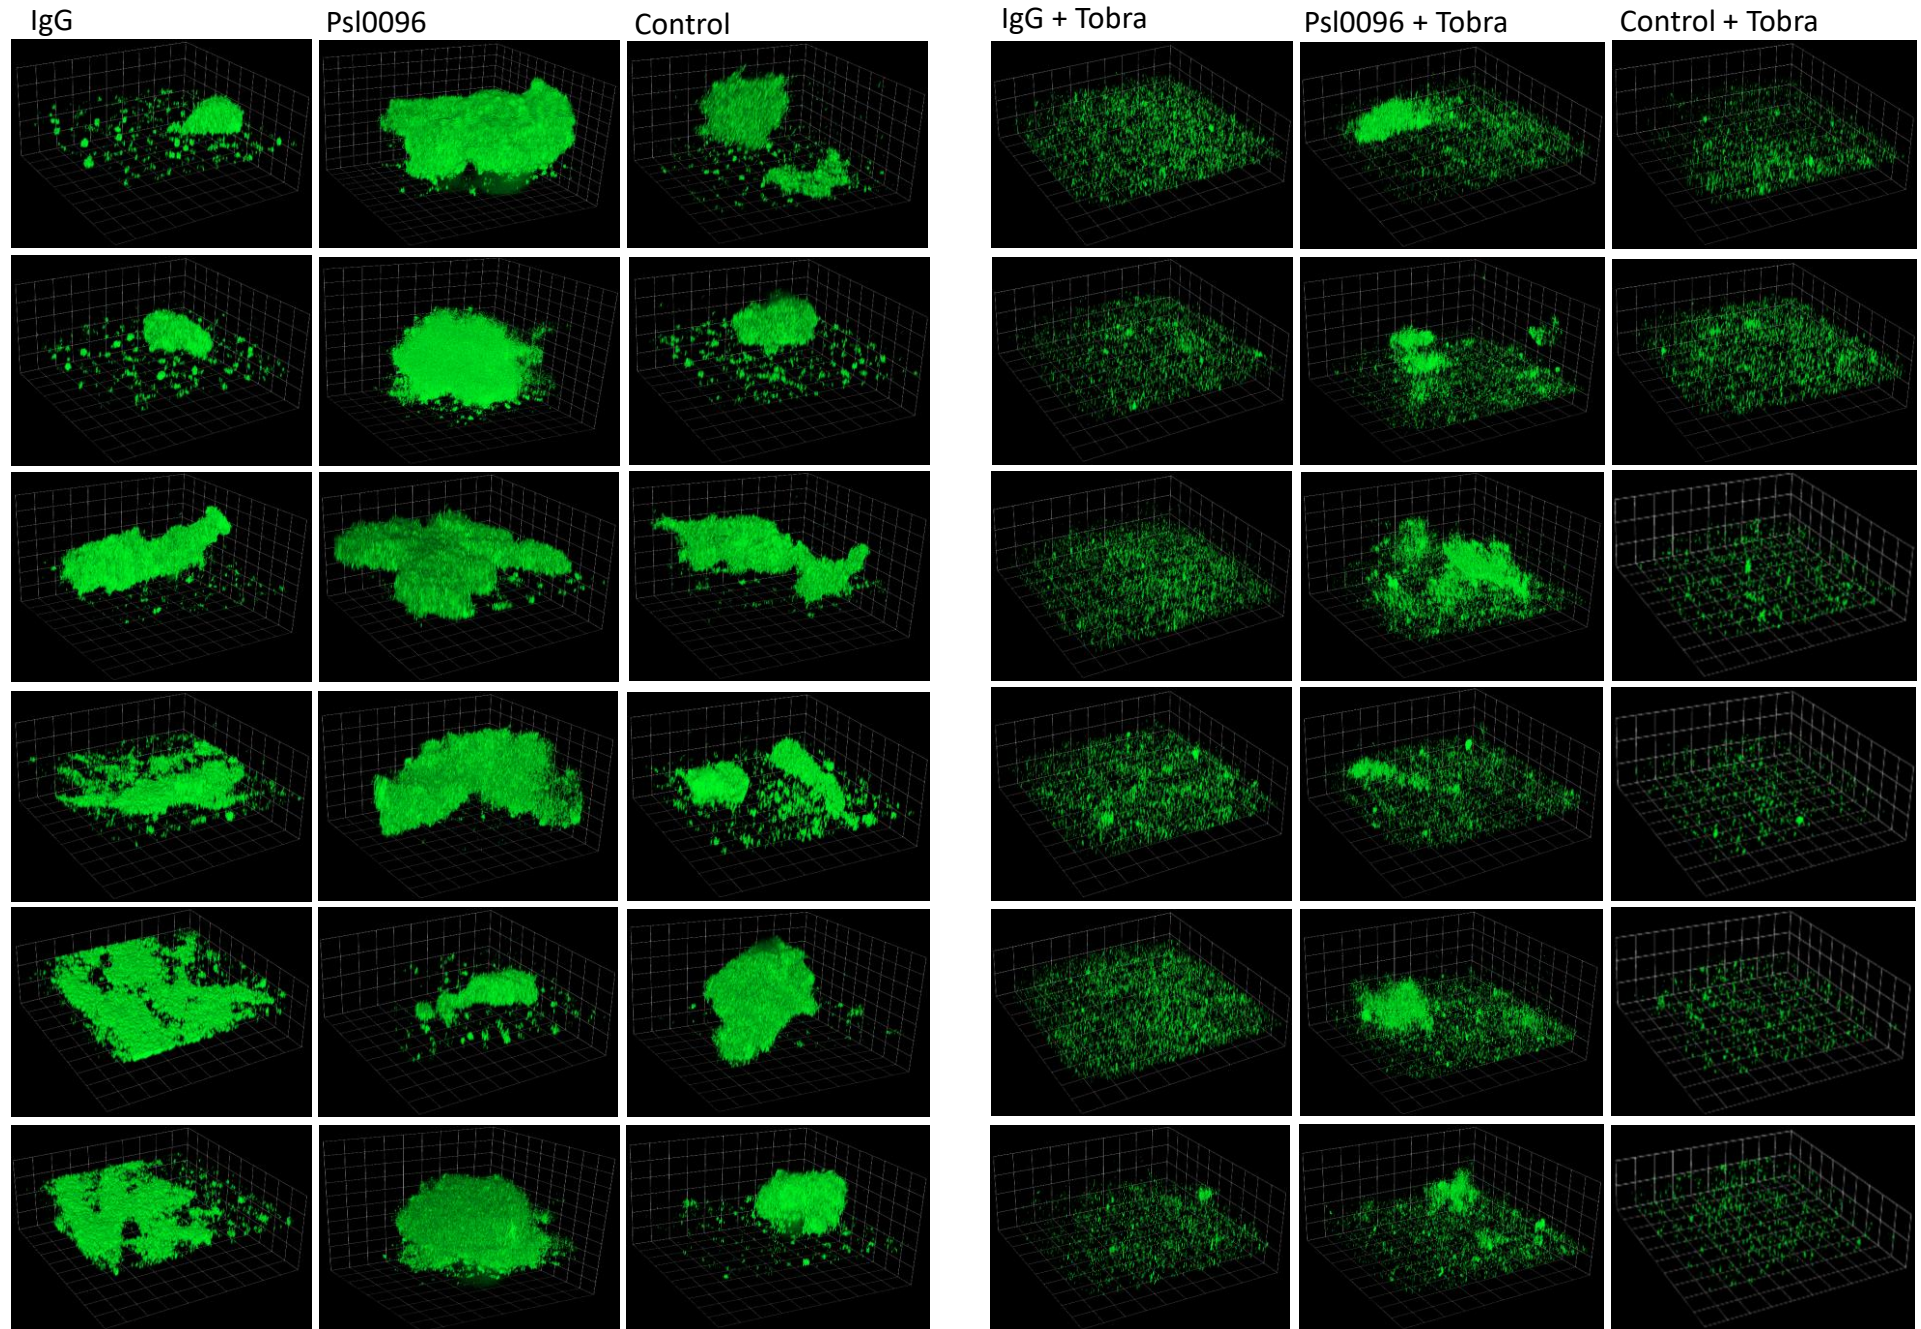



Pa549 (Eradicated) Trial2

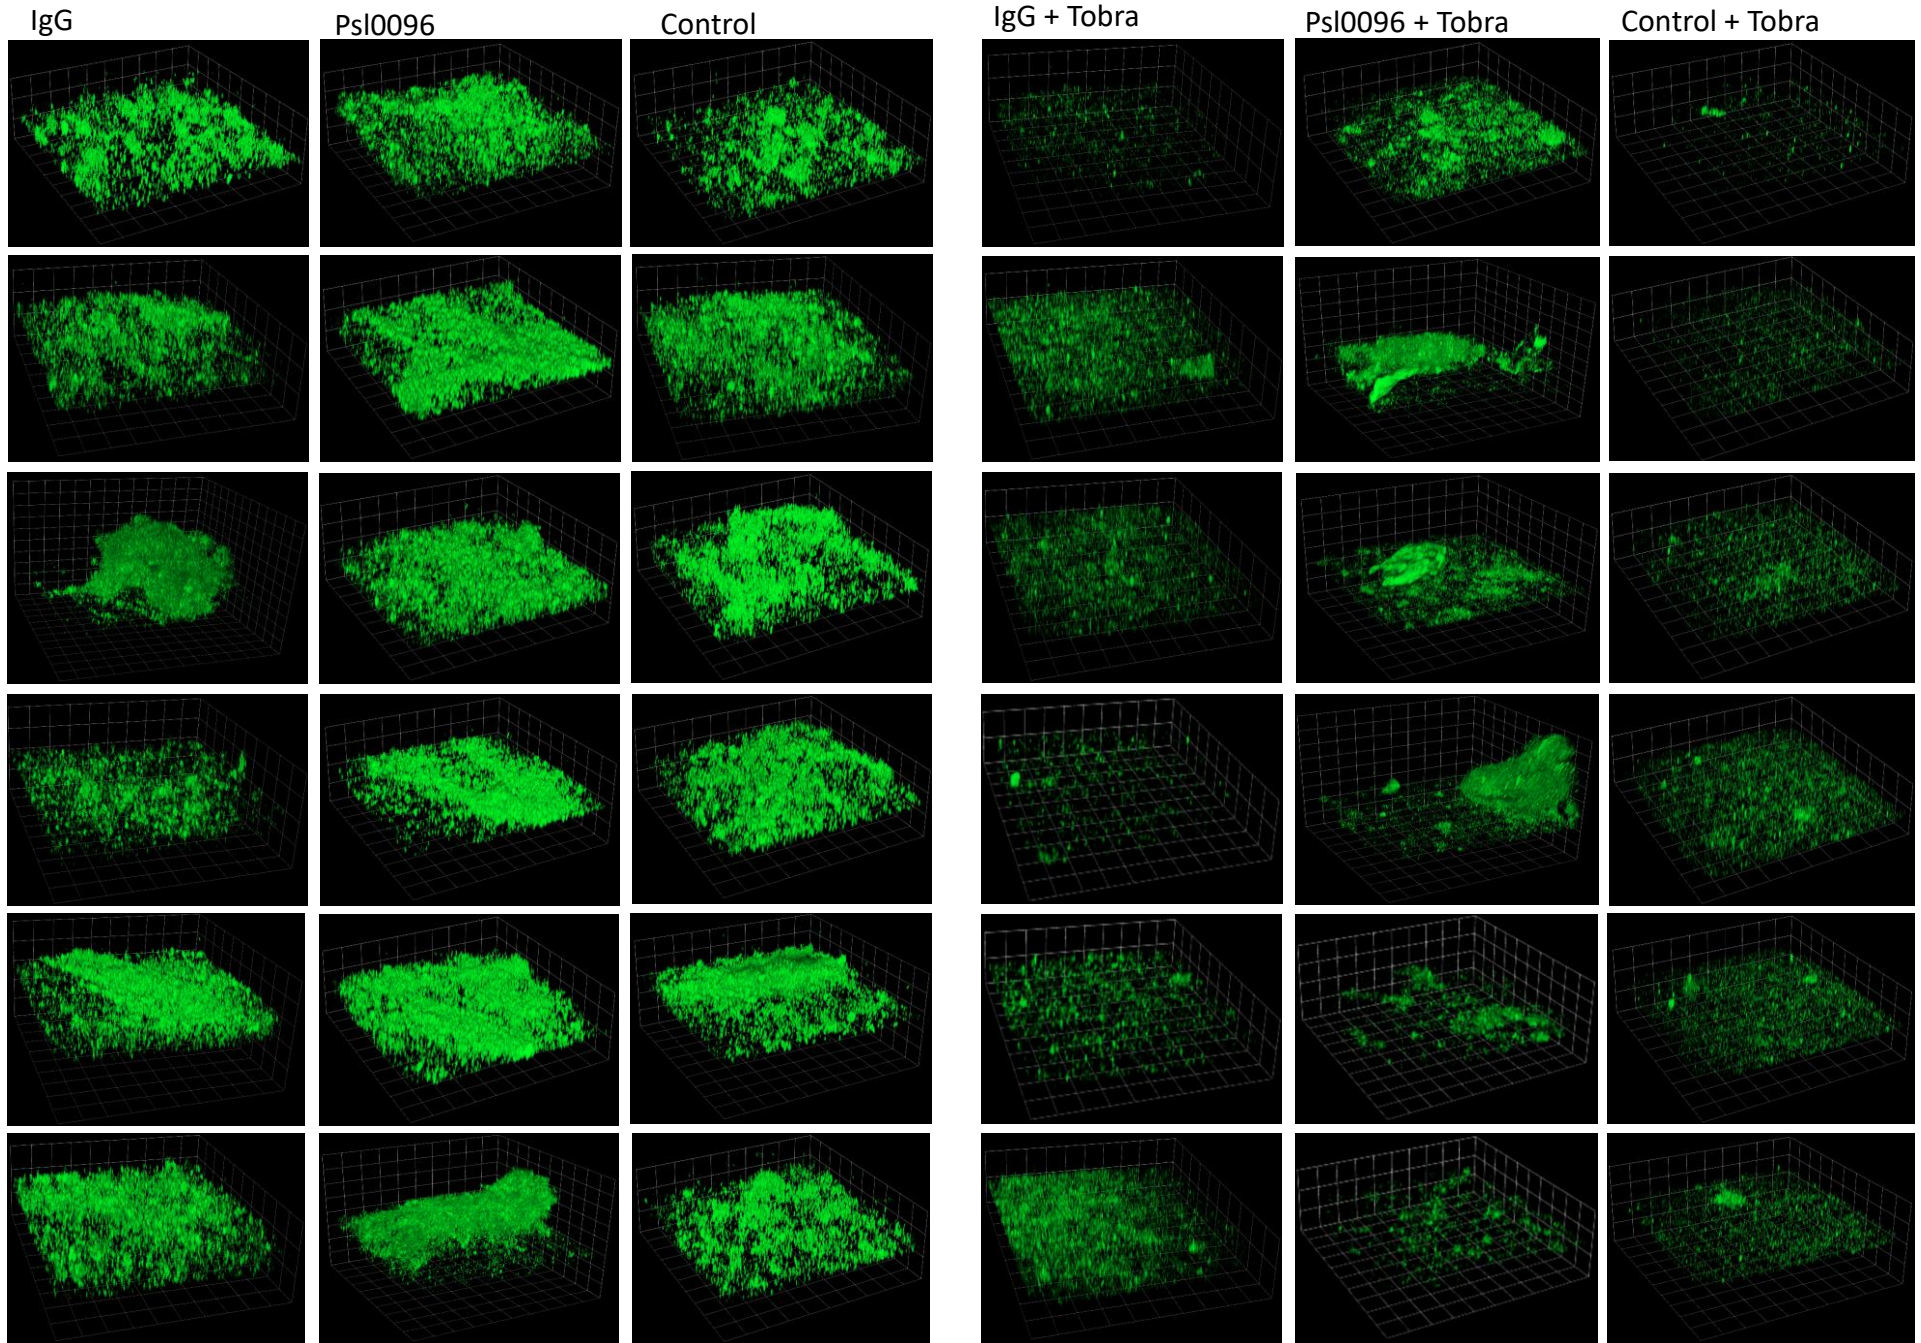



Pa549 (Eradicated) Trial3

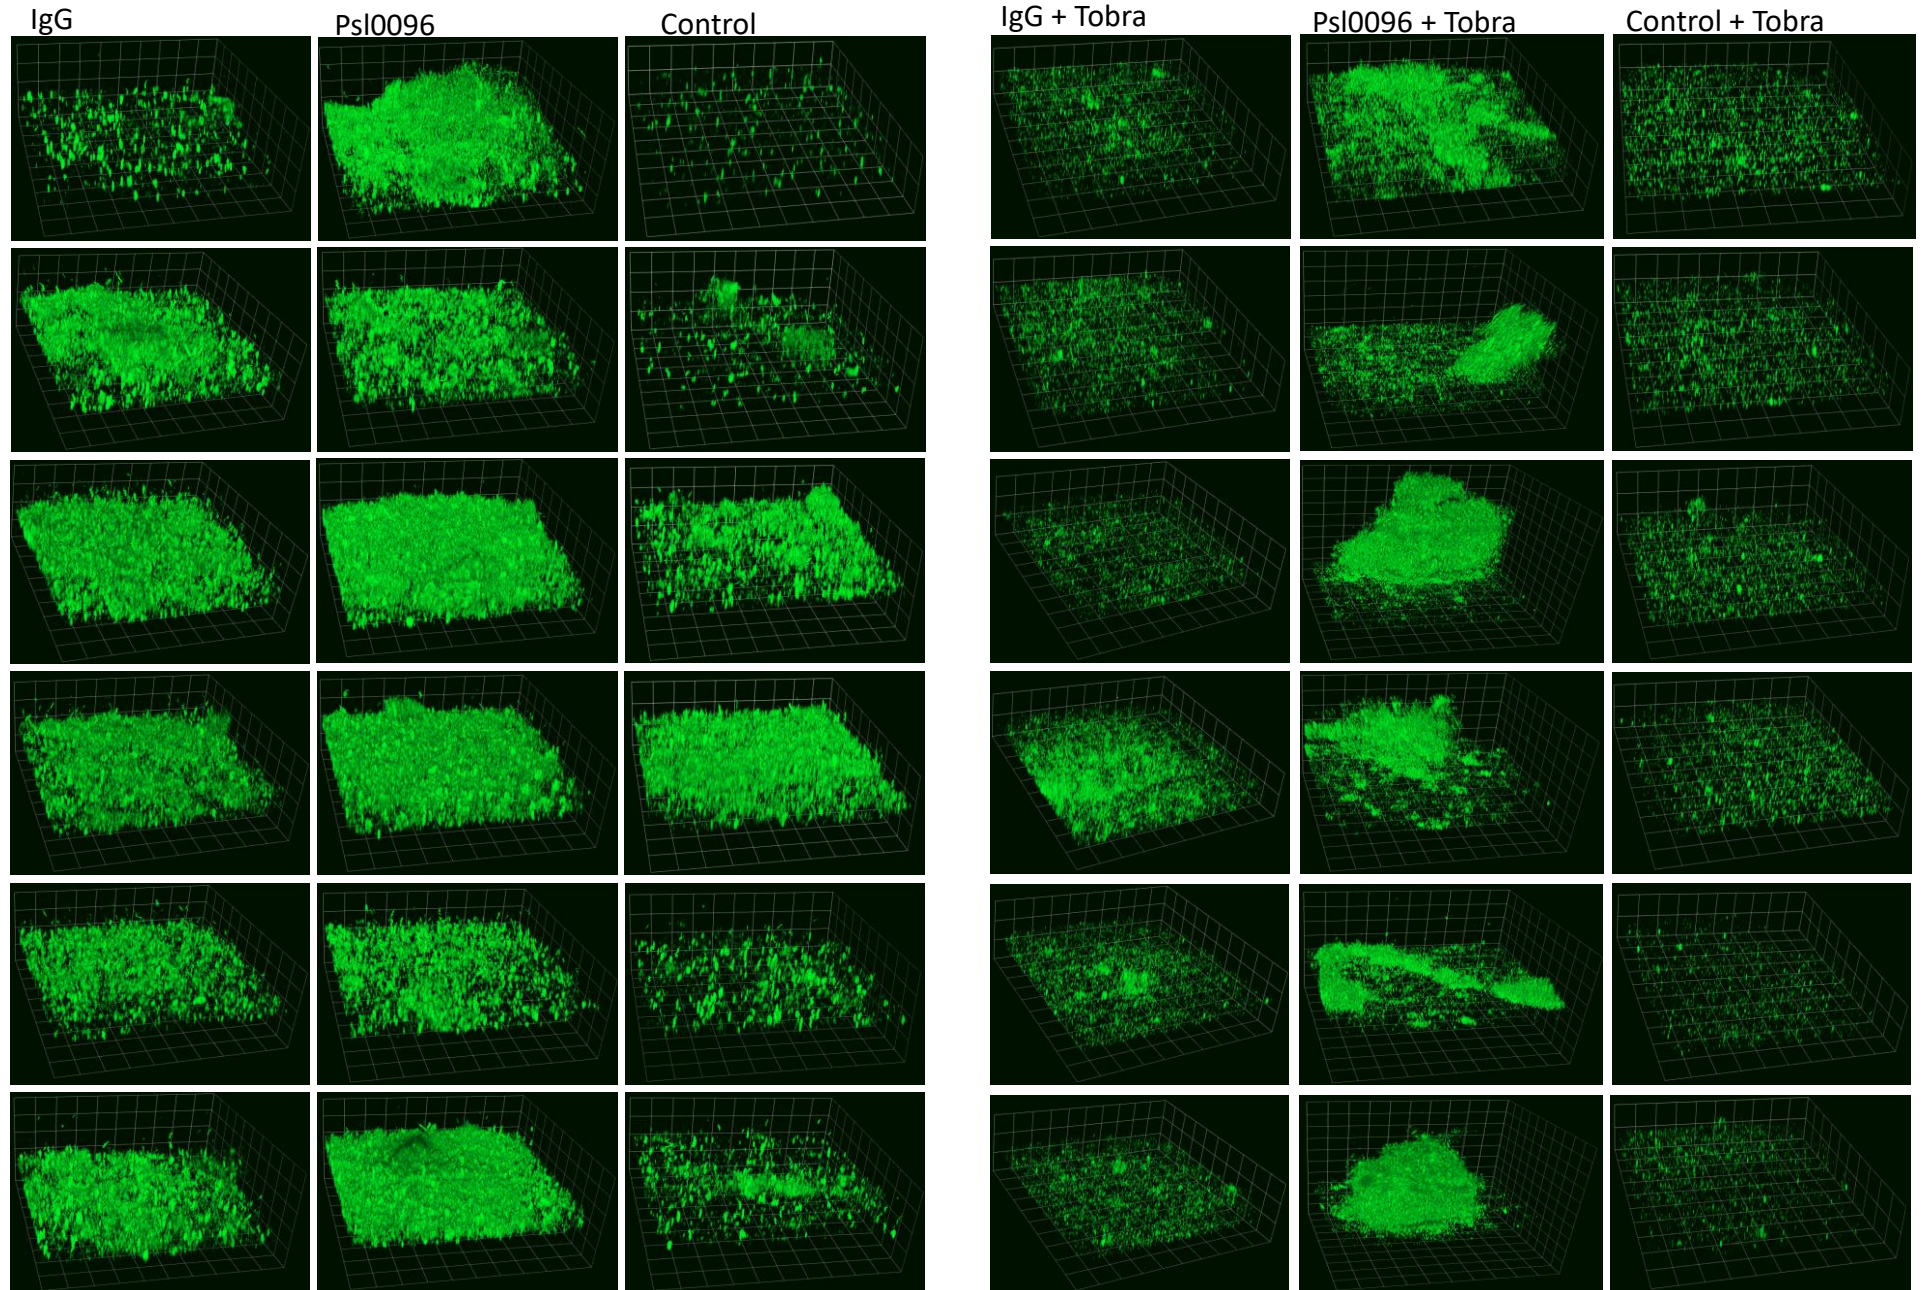



Pa404 (Eradicated) Trial1

IgG

PsI0096

Control

IgG + Tobra

PsI0096 + Tobra

Control + Tobra

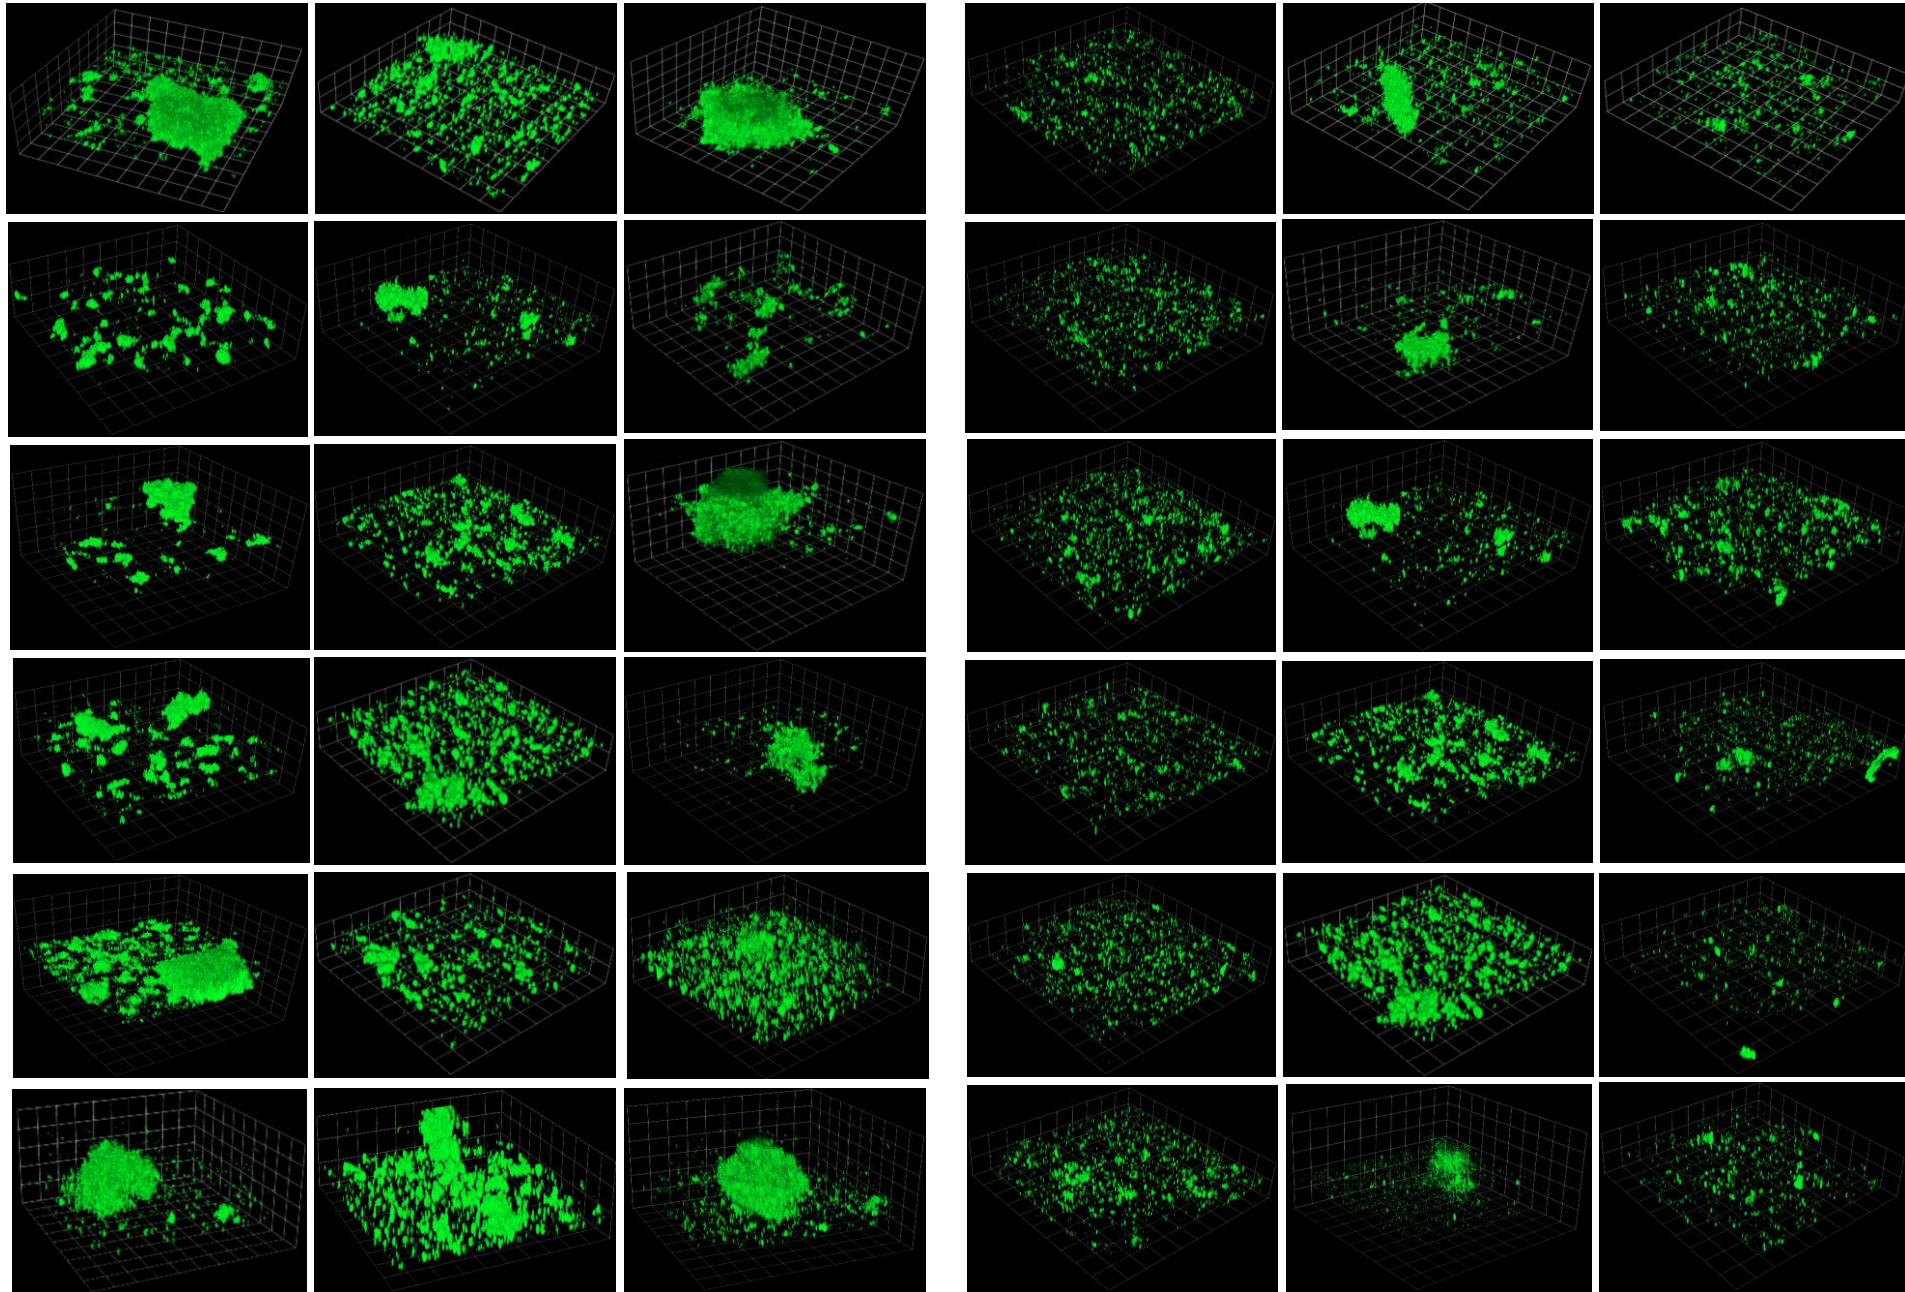



Pa404 (Eradicated) Trial2

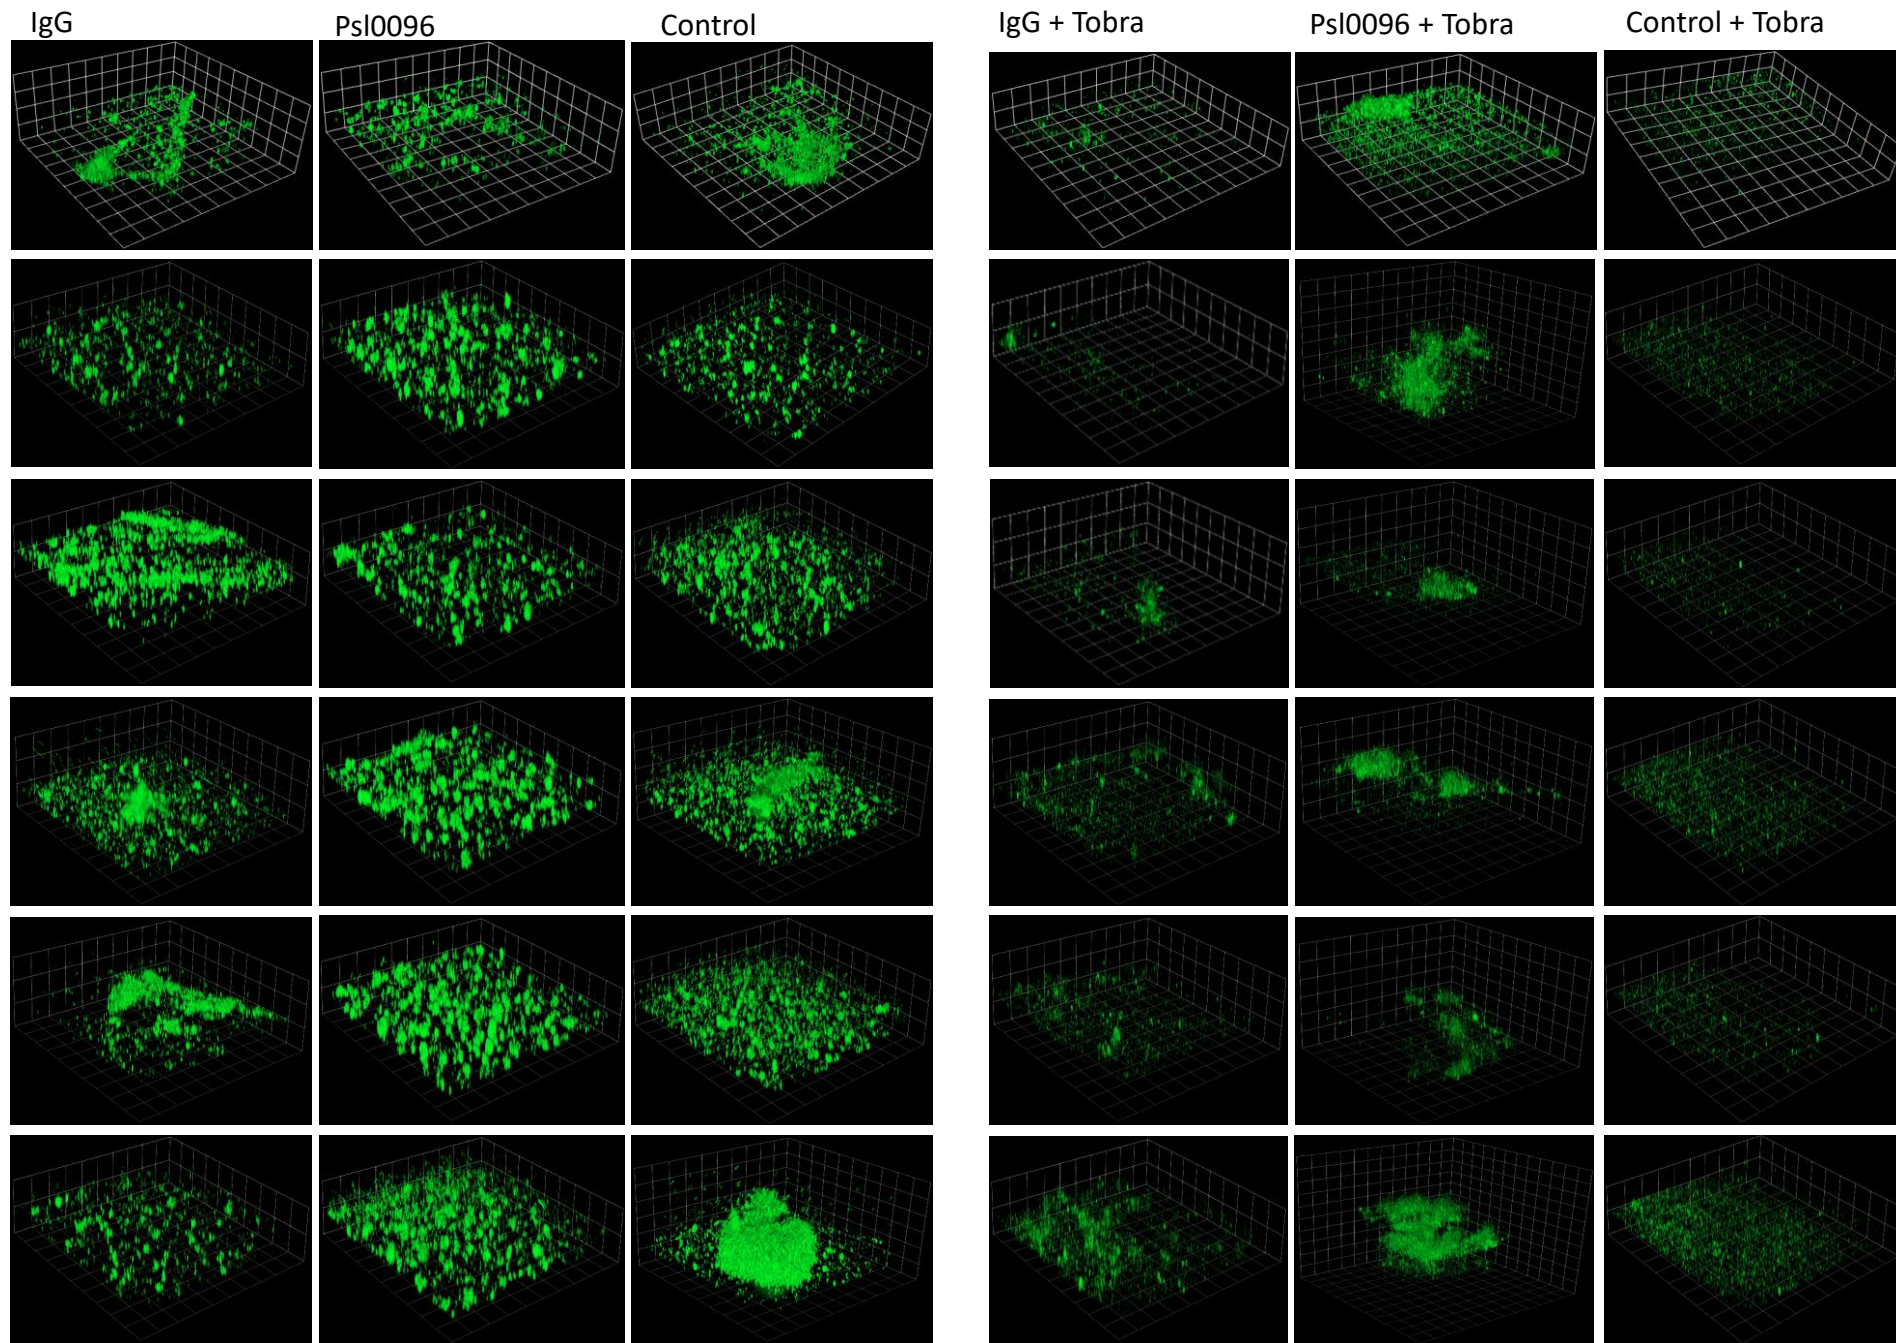



Pa404 (Eradicated) Trial3

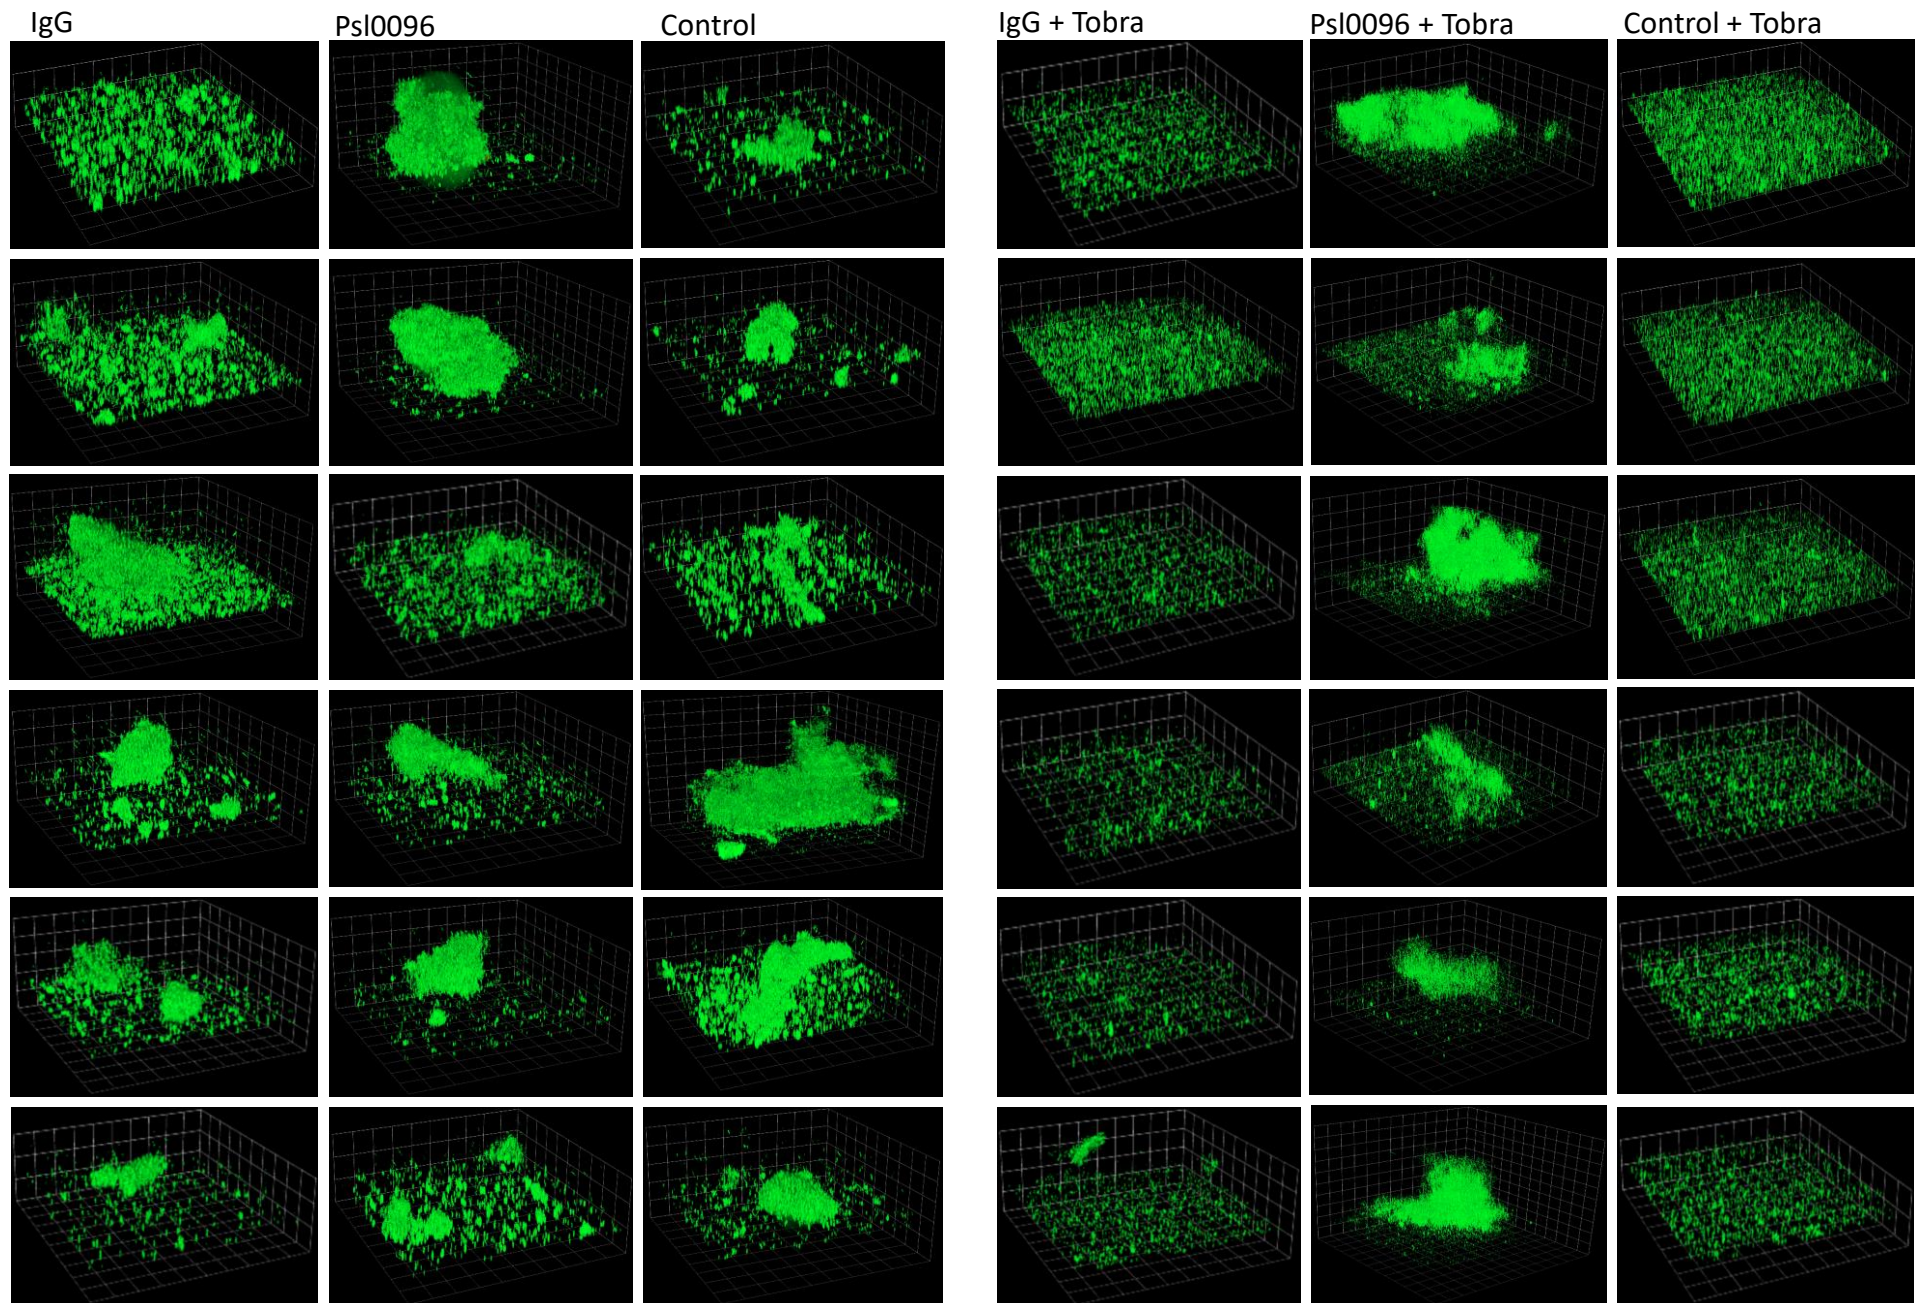



Pa288 (Eradicated) Trial1

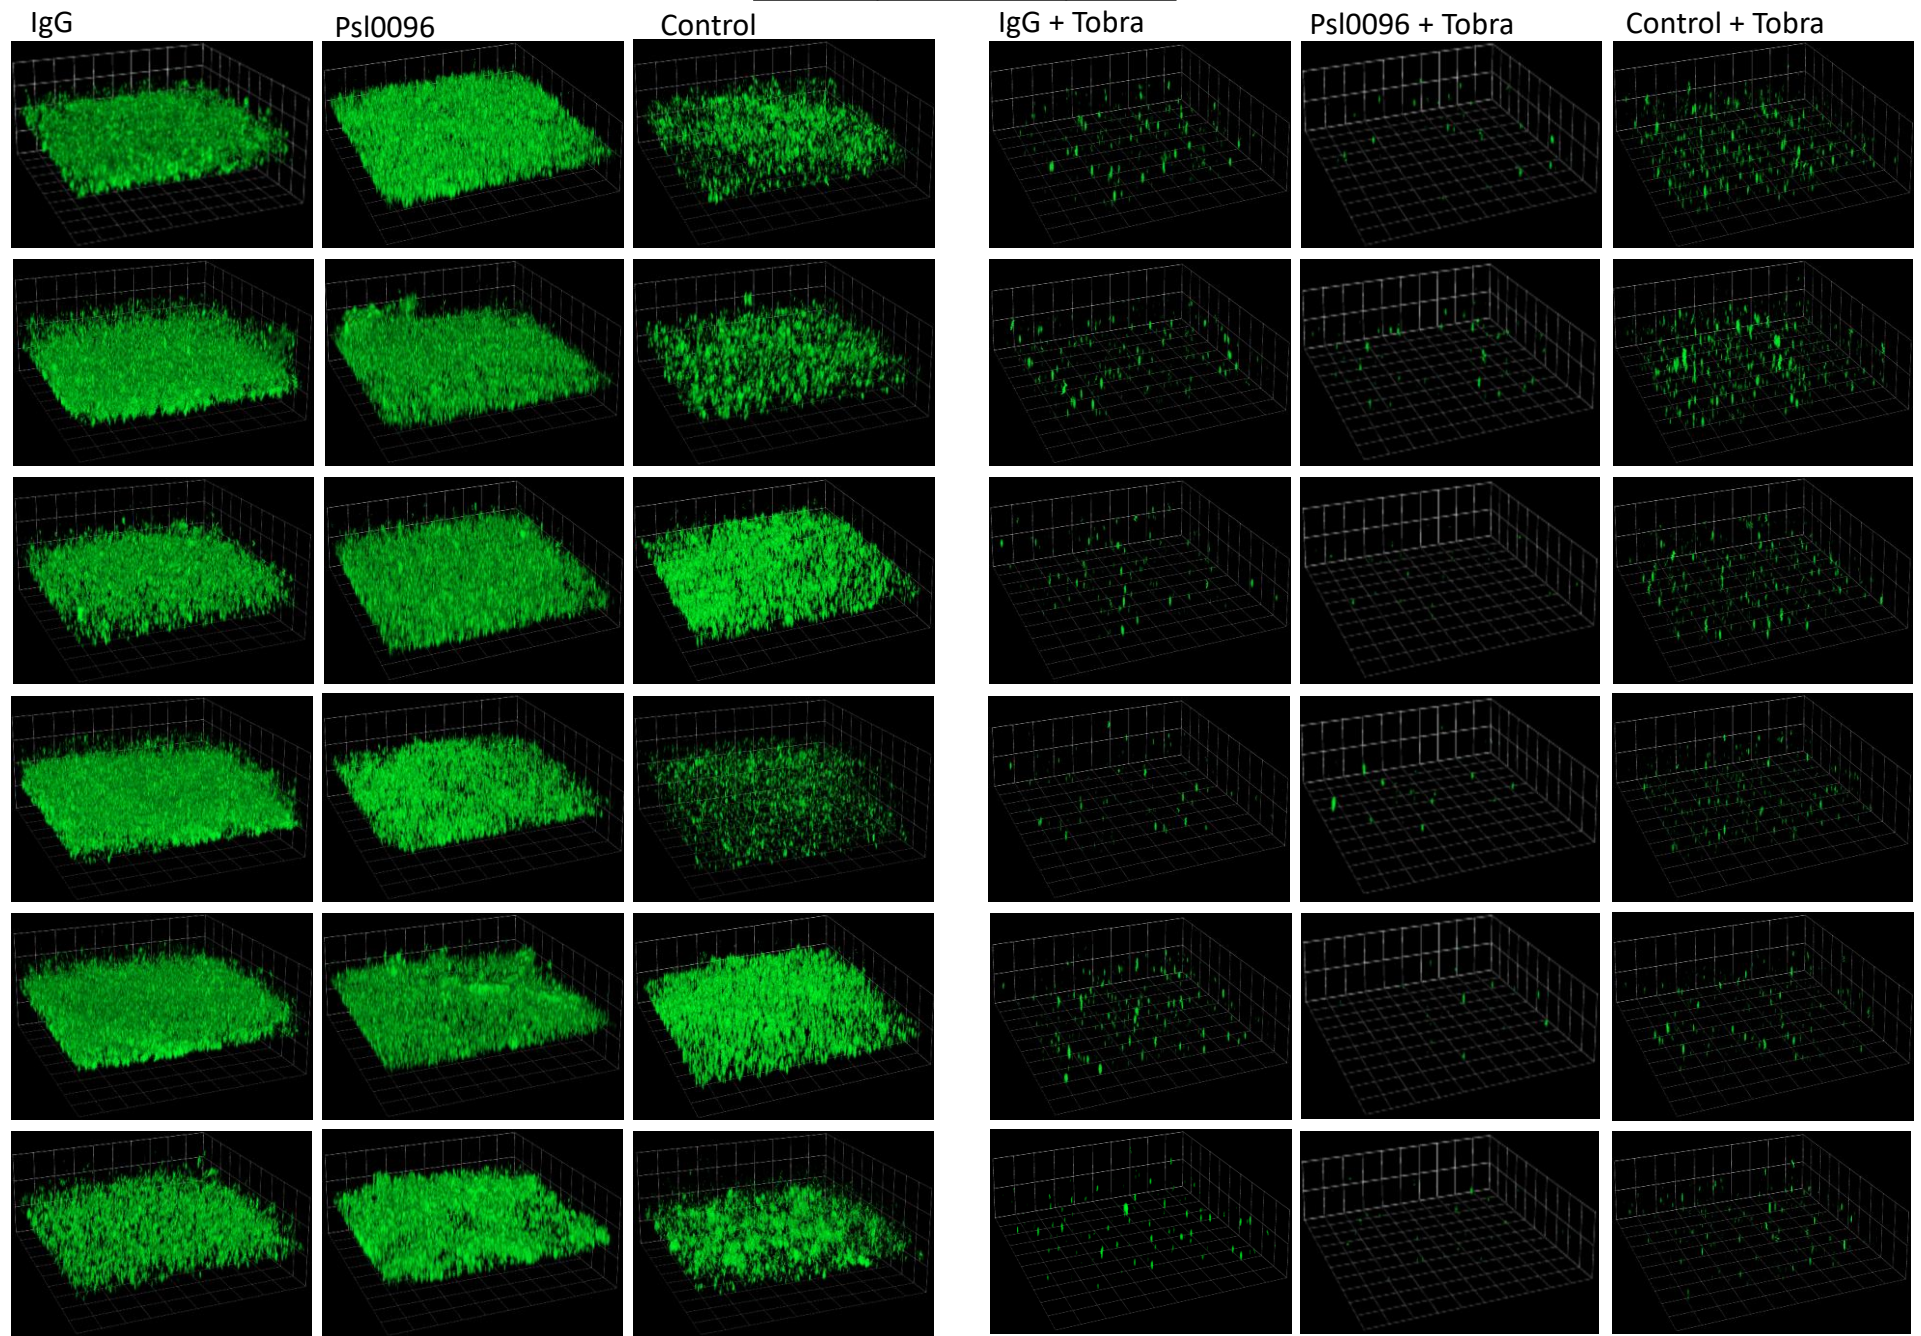



Pa288 (Eradicated) Trial2

IgG

Psi0096

Control

IgG + Tobra

Psi0096 + Tobra

Control + Tobra

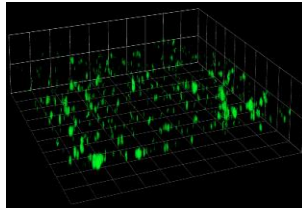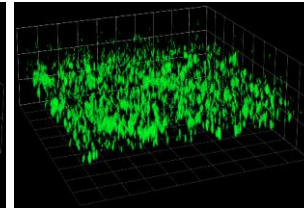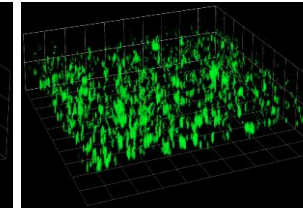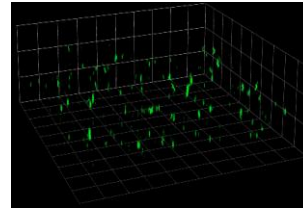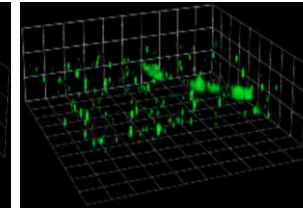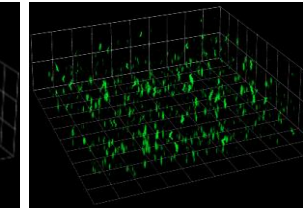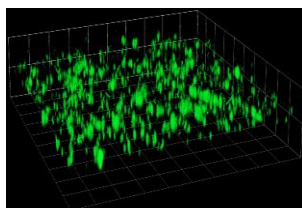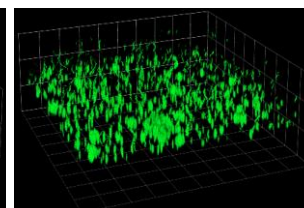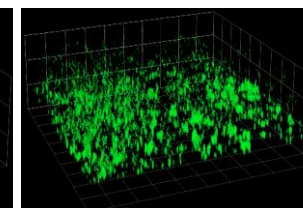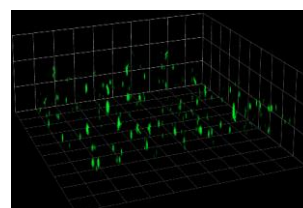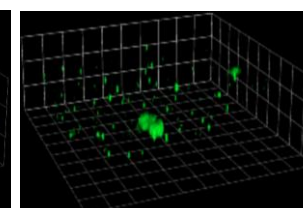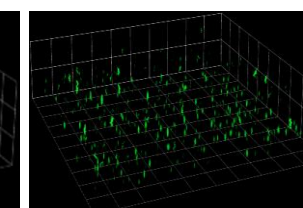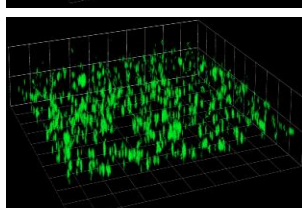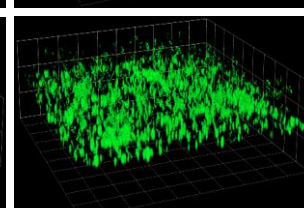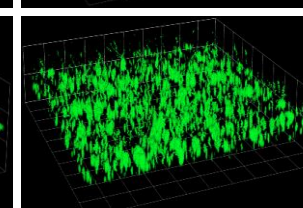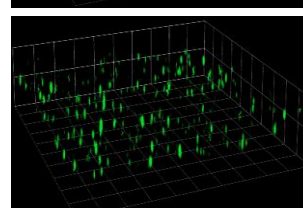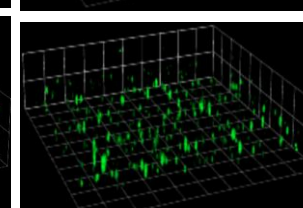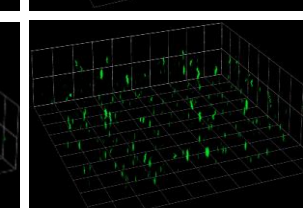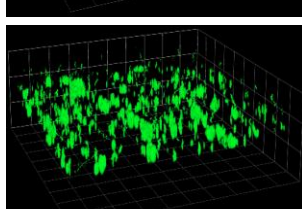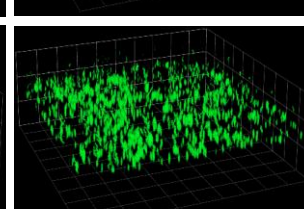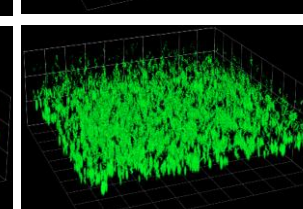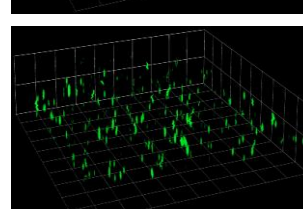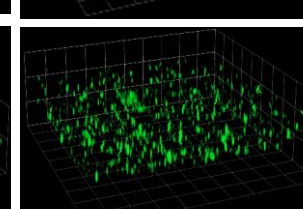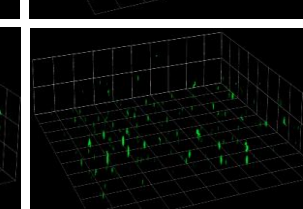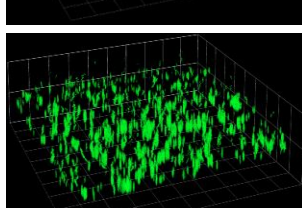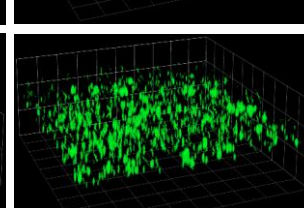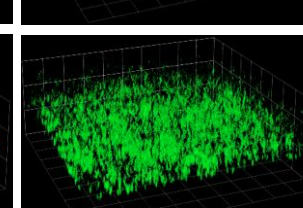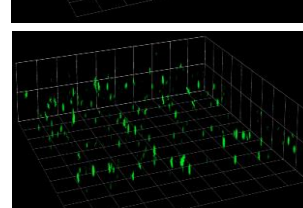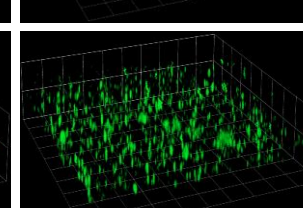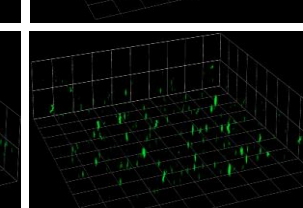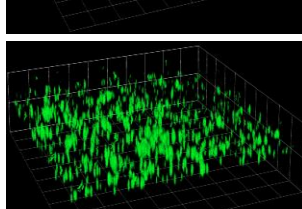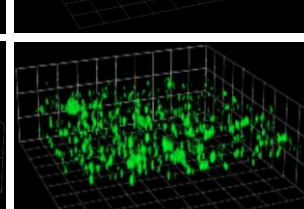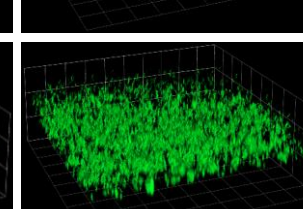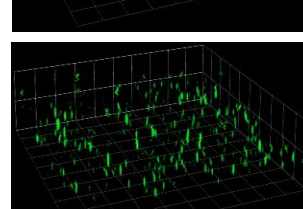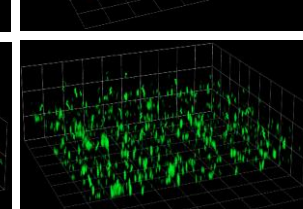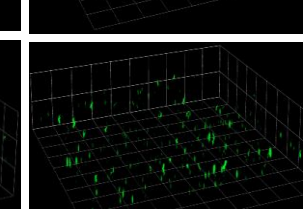



Pa288 (Eradicated) Trial3

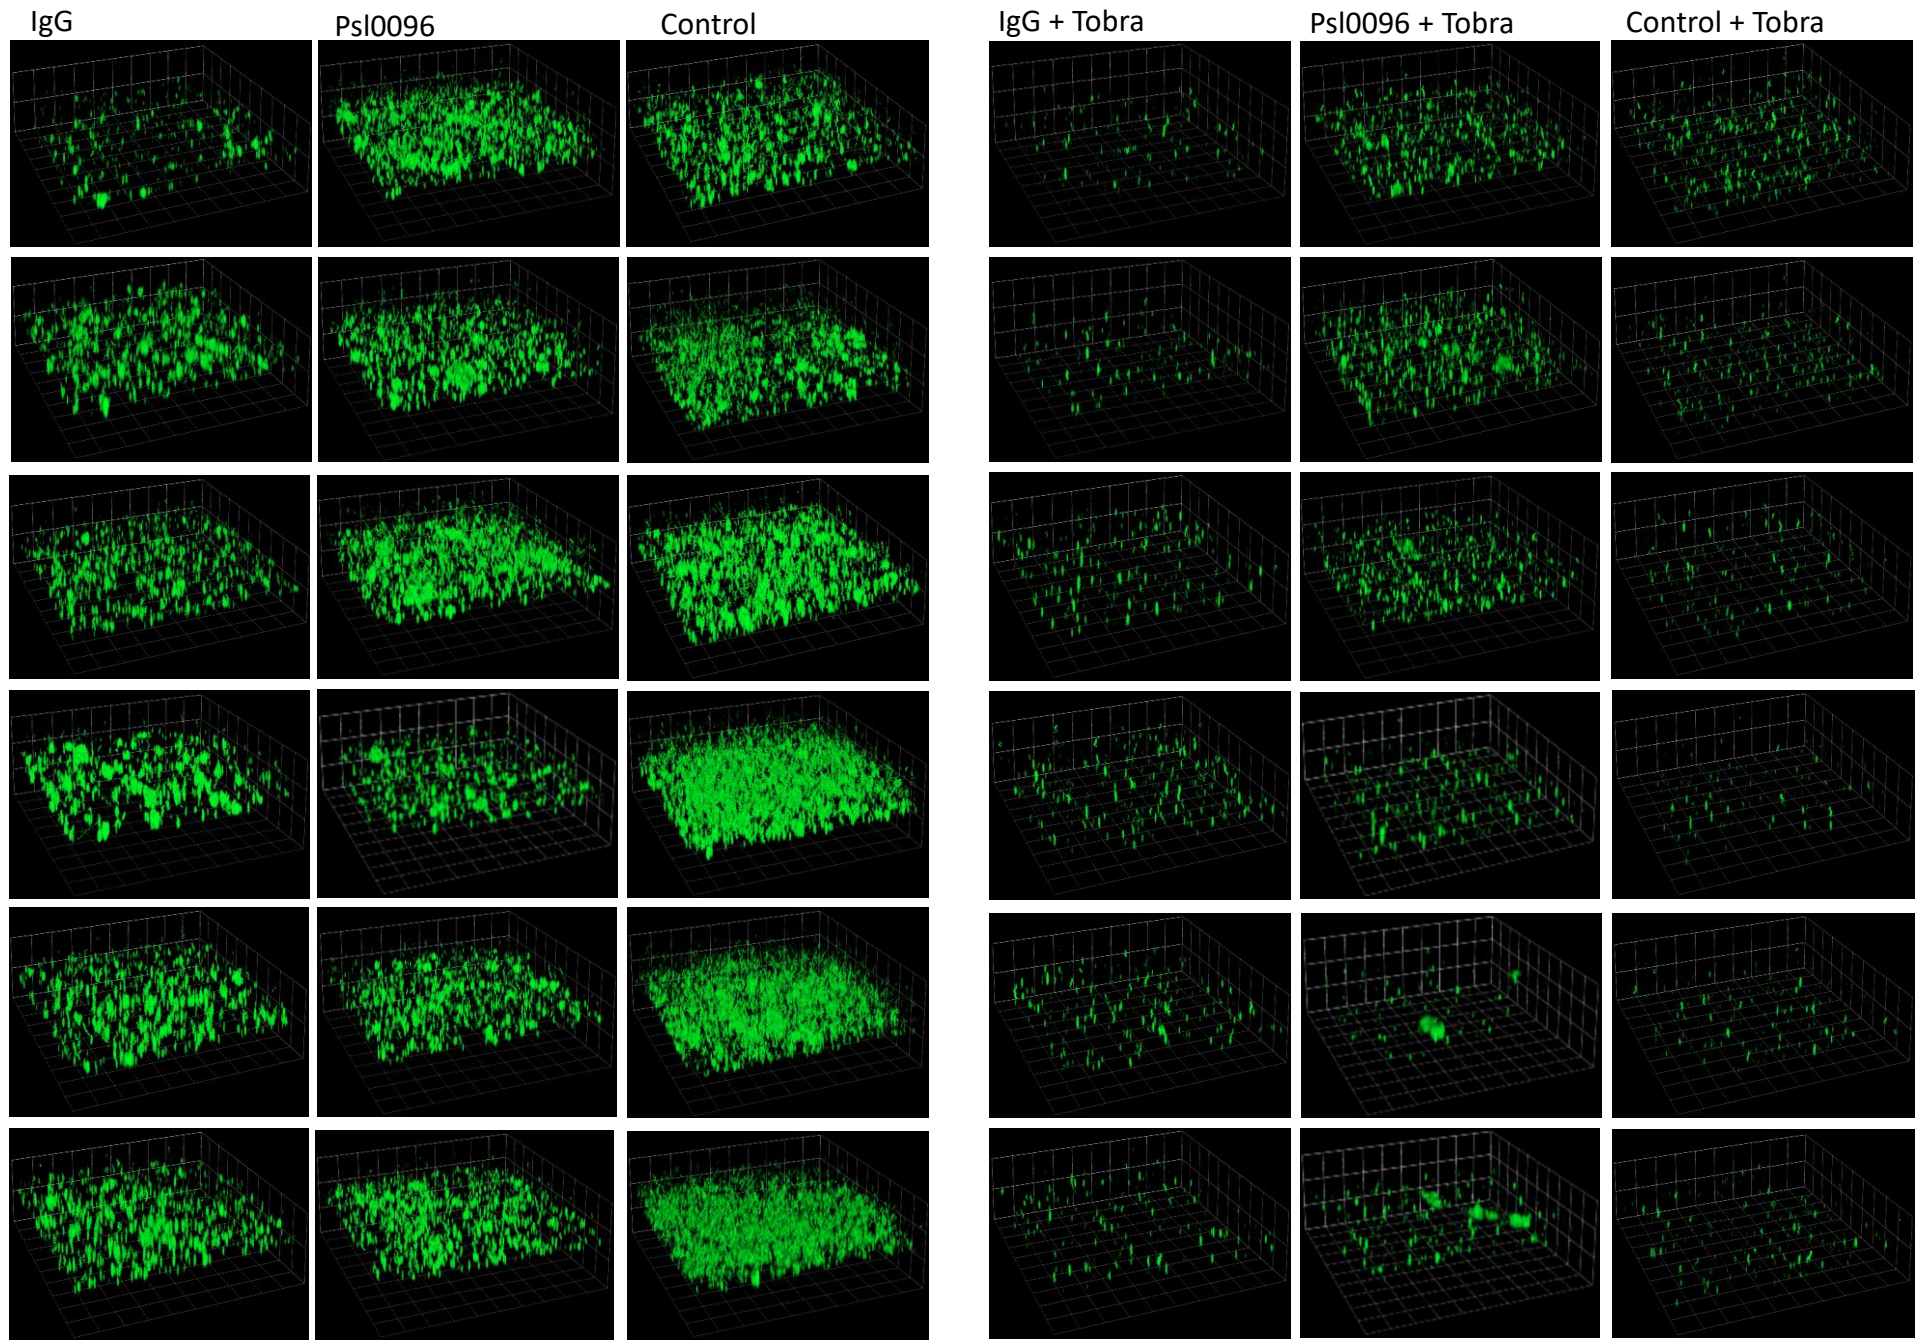



Pa325 (Eradicated) Trial1

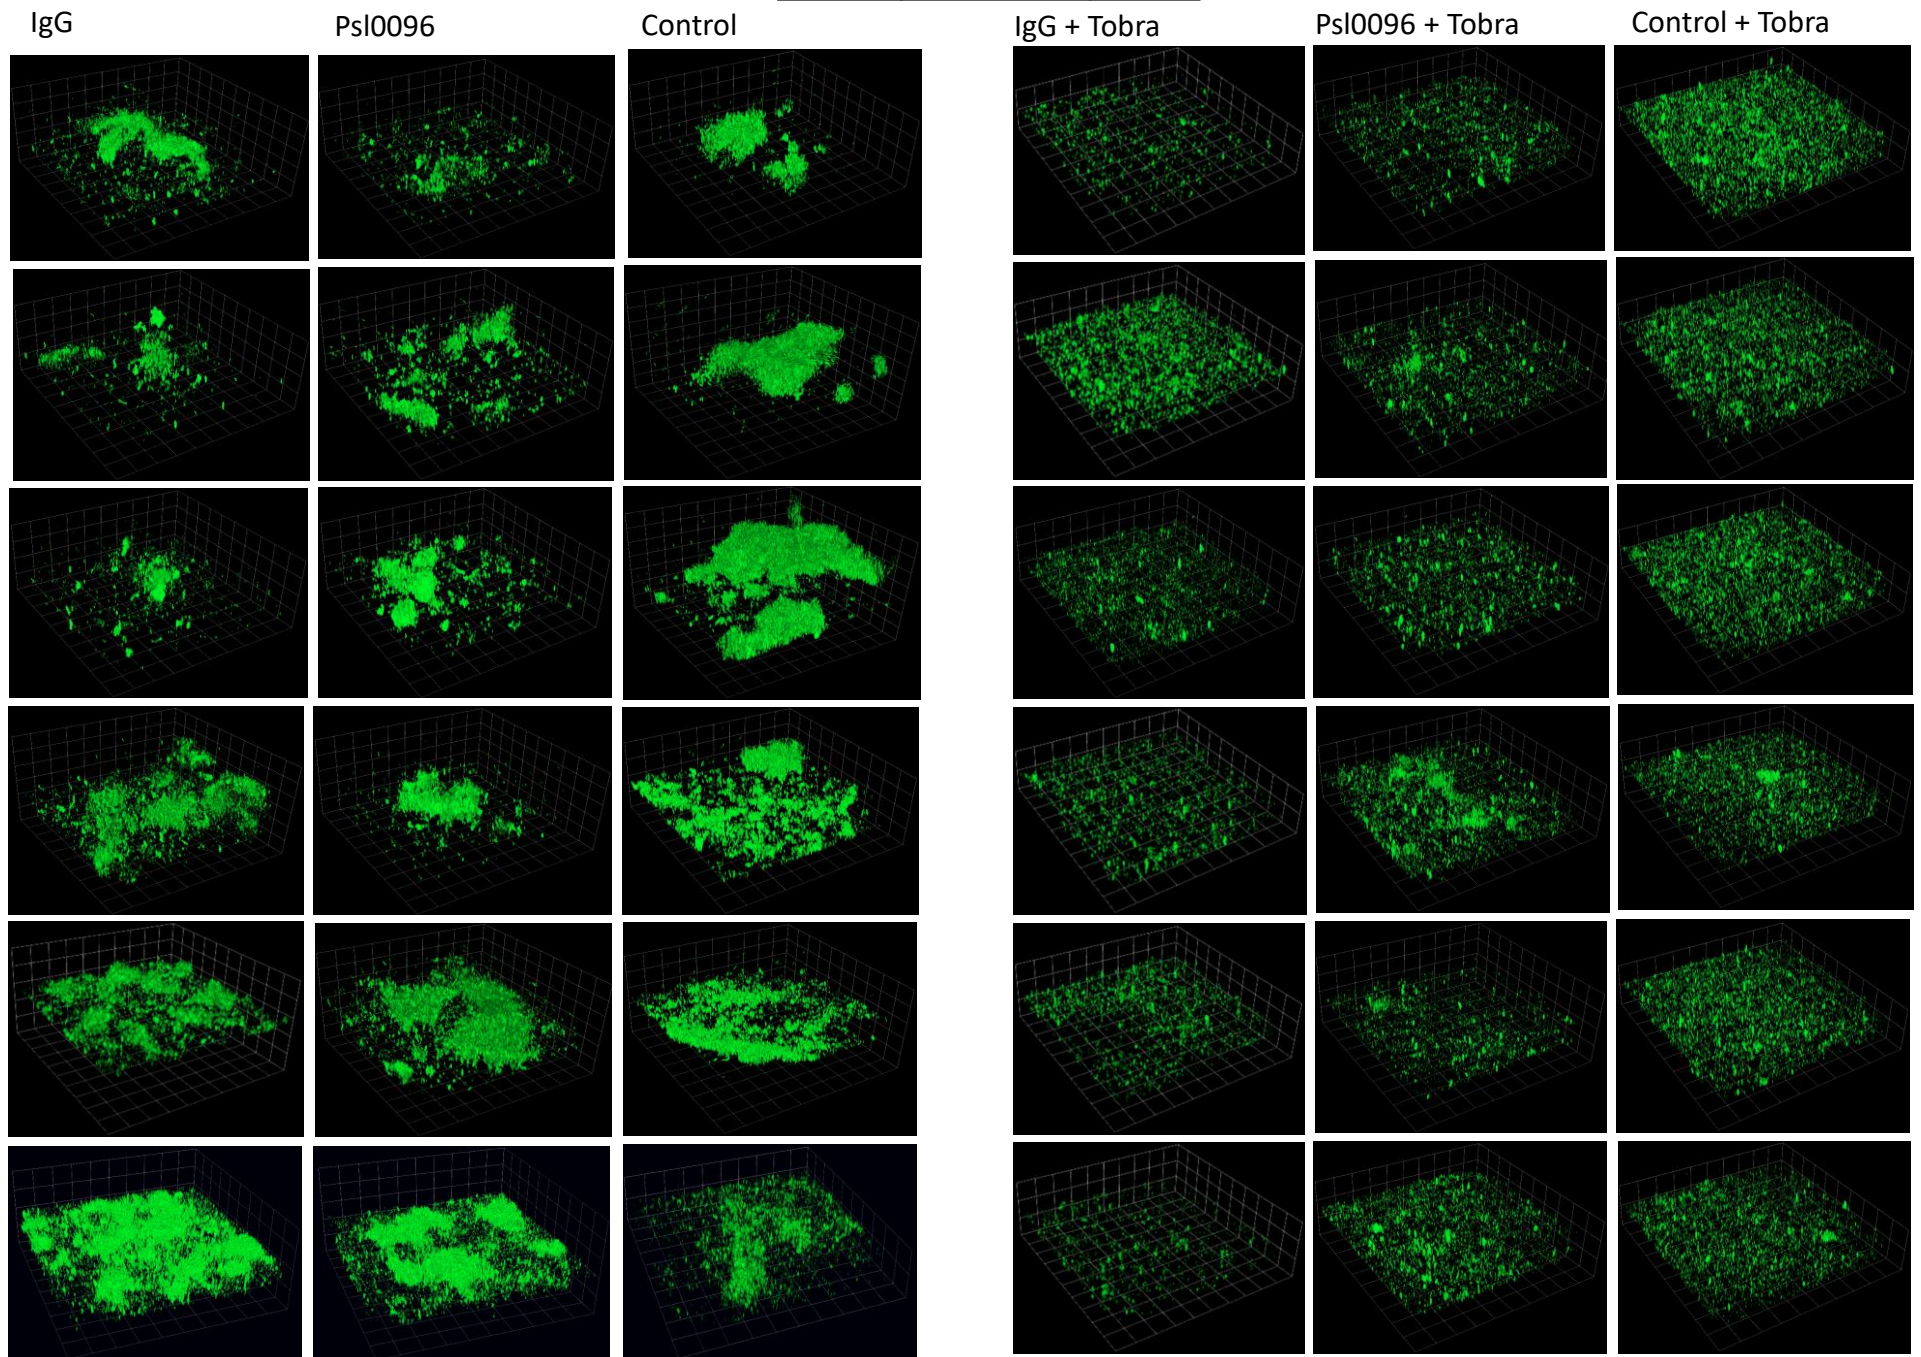



Pa325 (Eradicated) Trial2

IgG

Psl0096

Control

IgG + Tobra

Psl0096 + Tobra

Control + Tobra

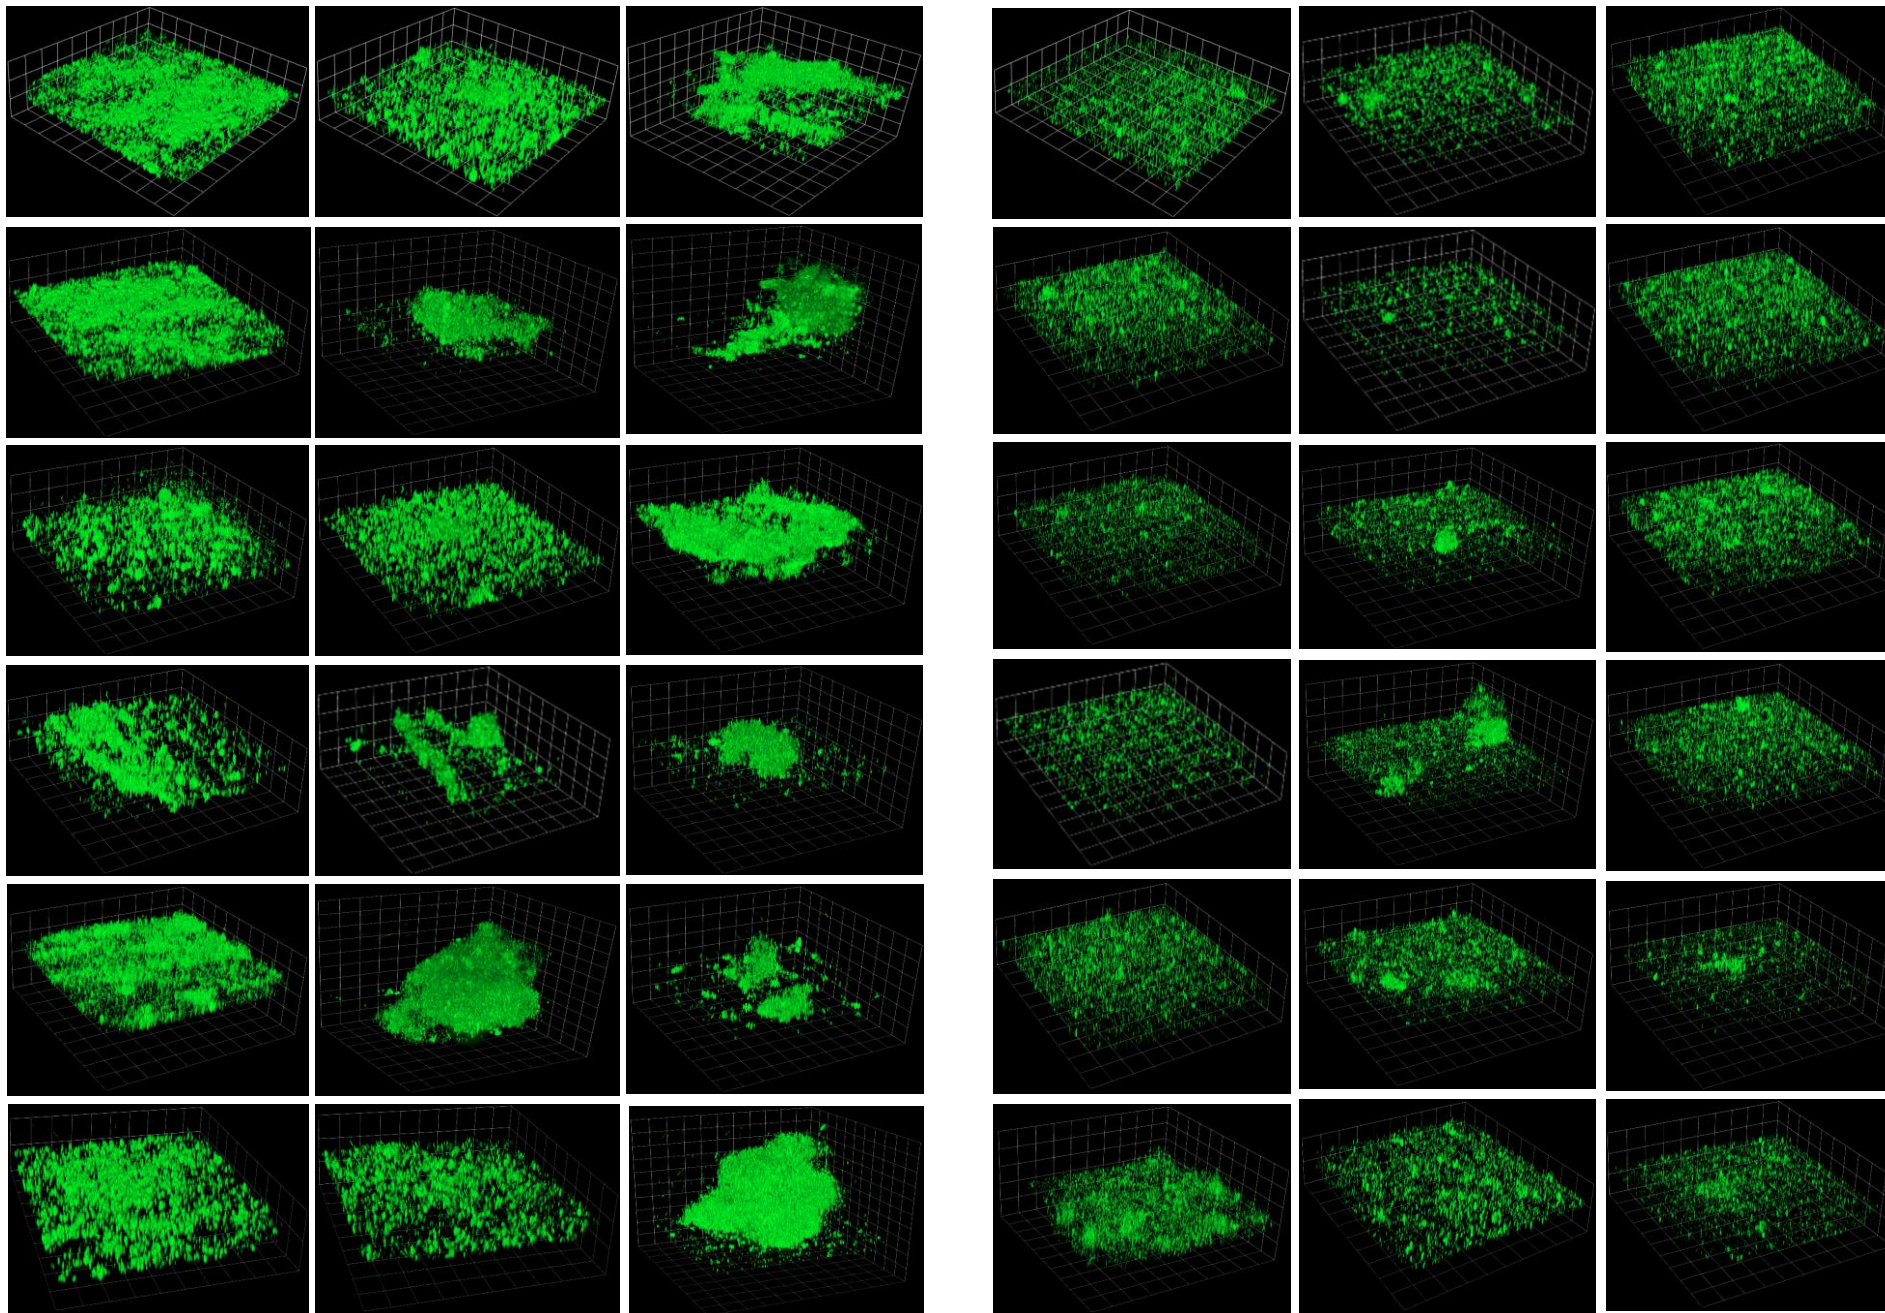



Pa325 (Eradicated) Trial3

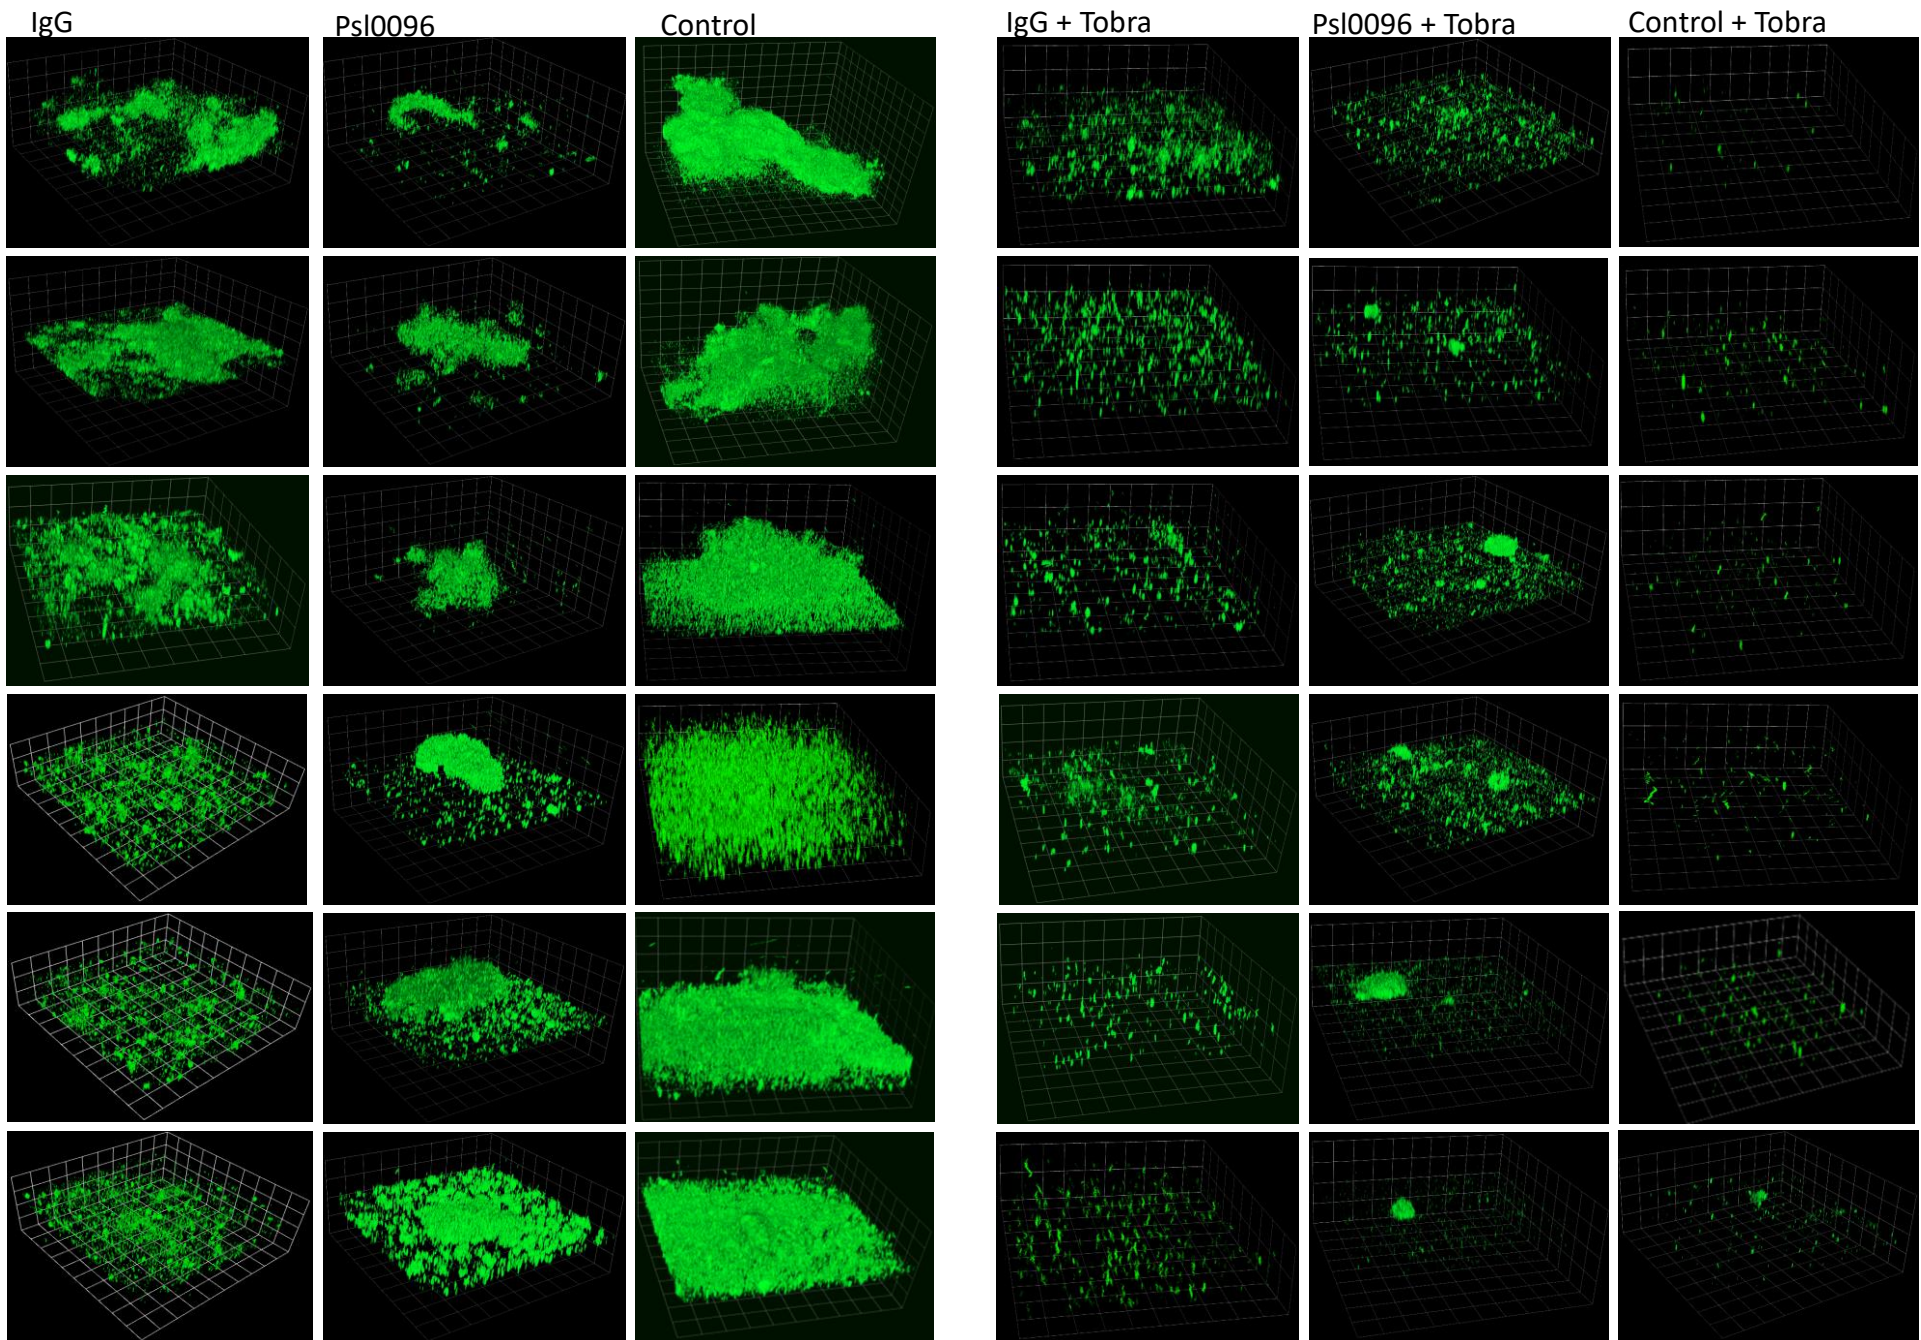



Pa263 (Eradicated) Trial1

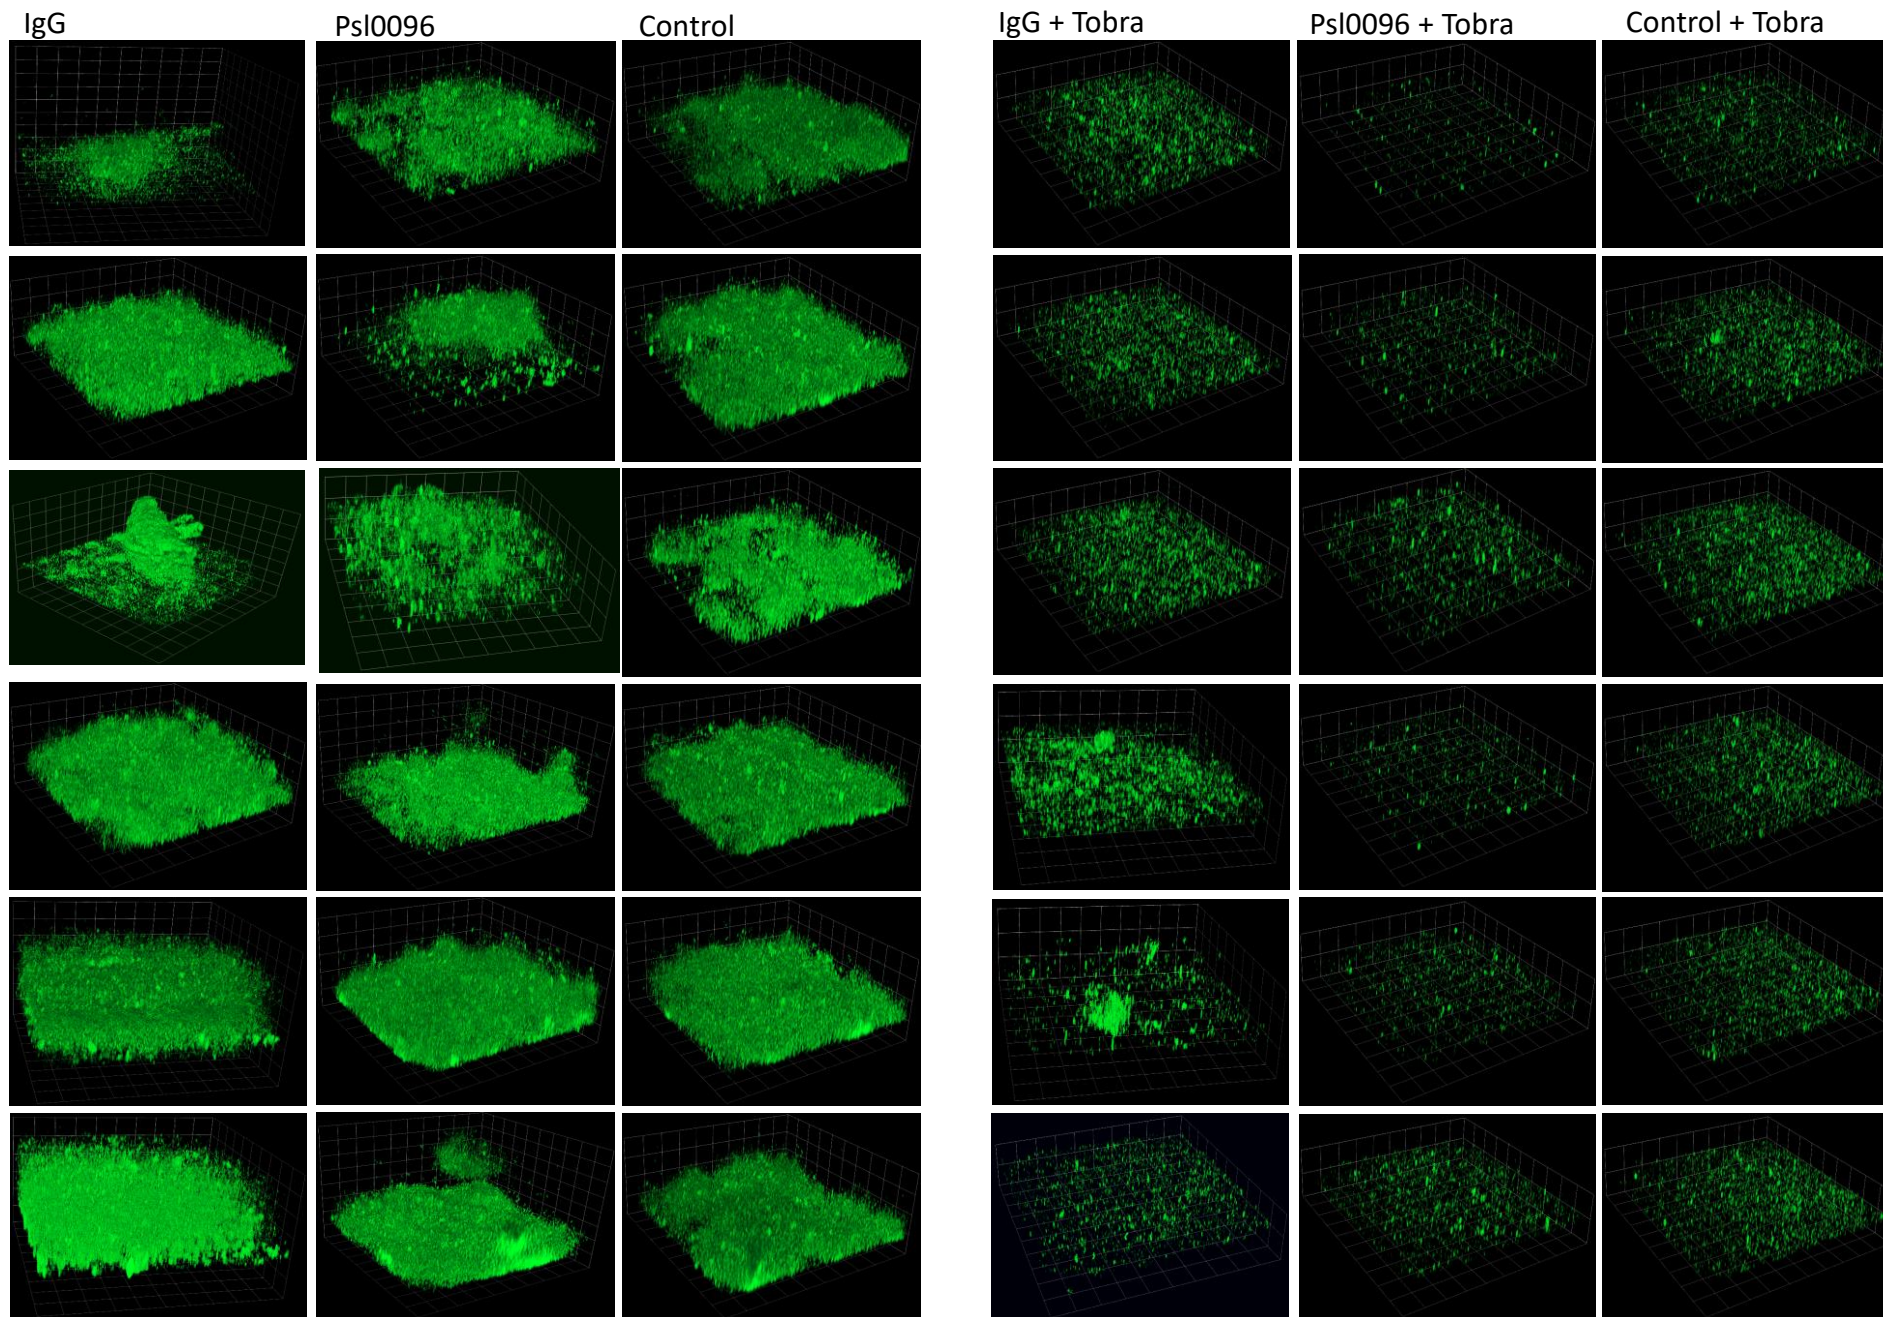



Pa263 (Eradicated) Trial2

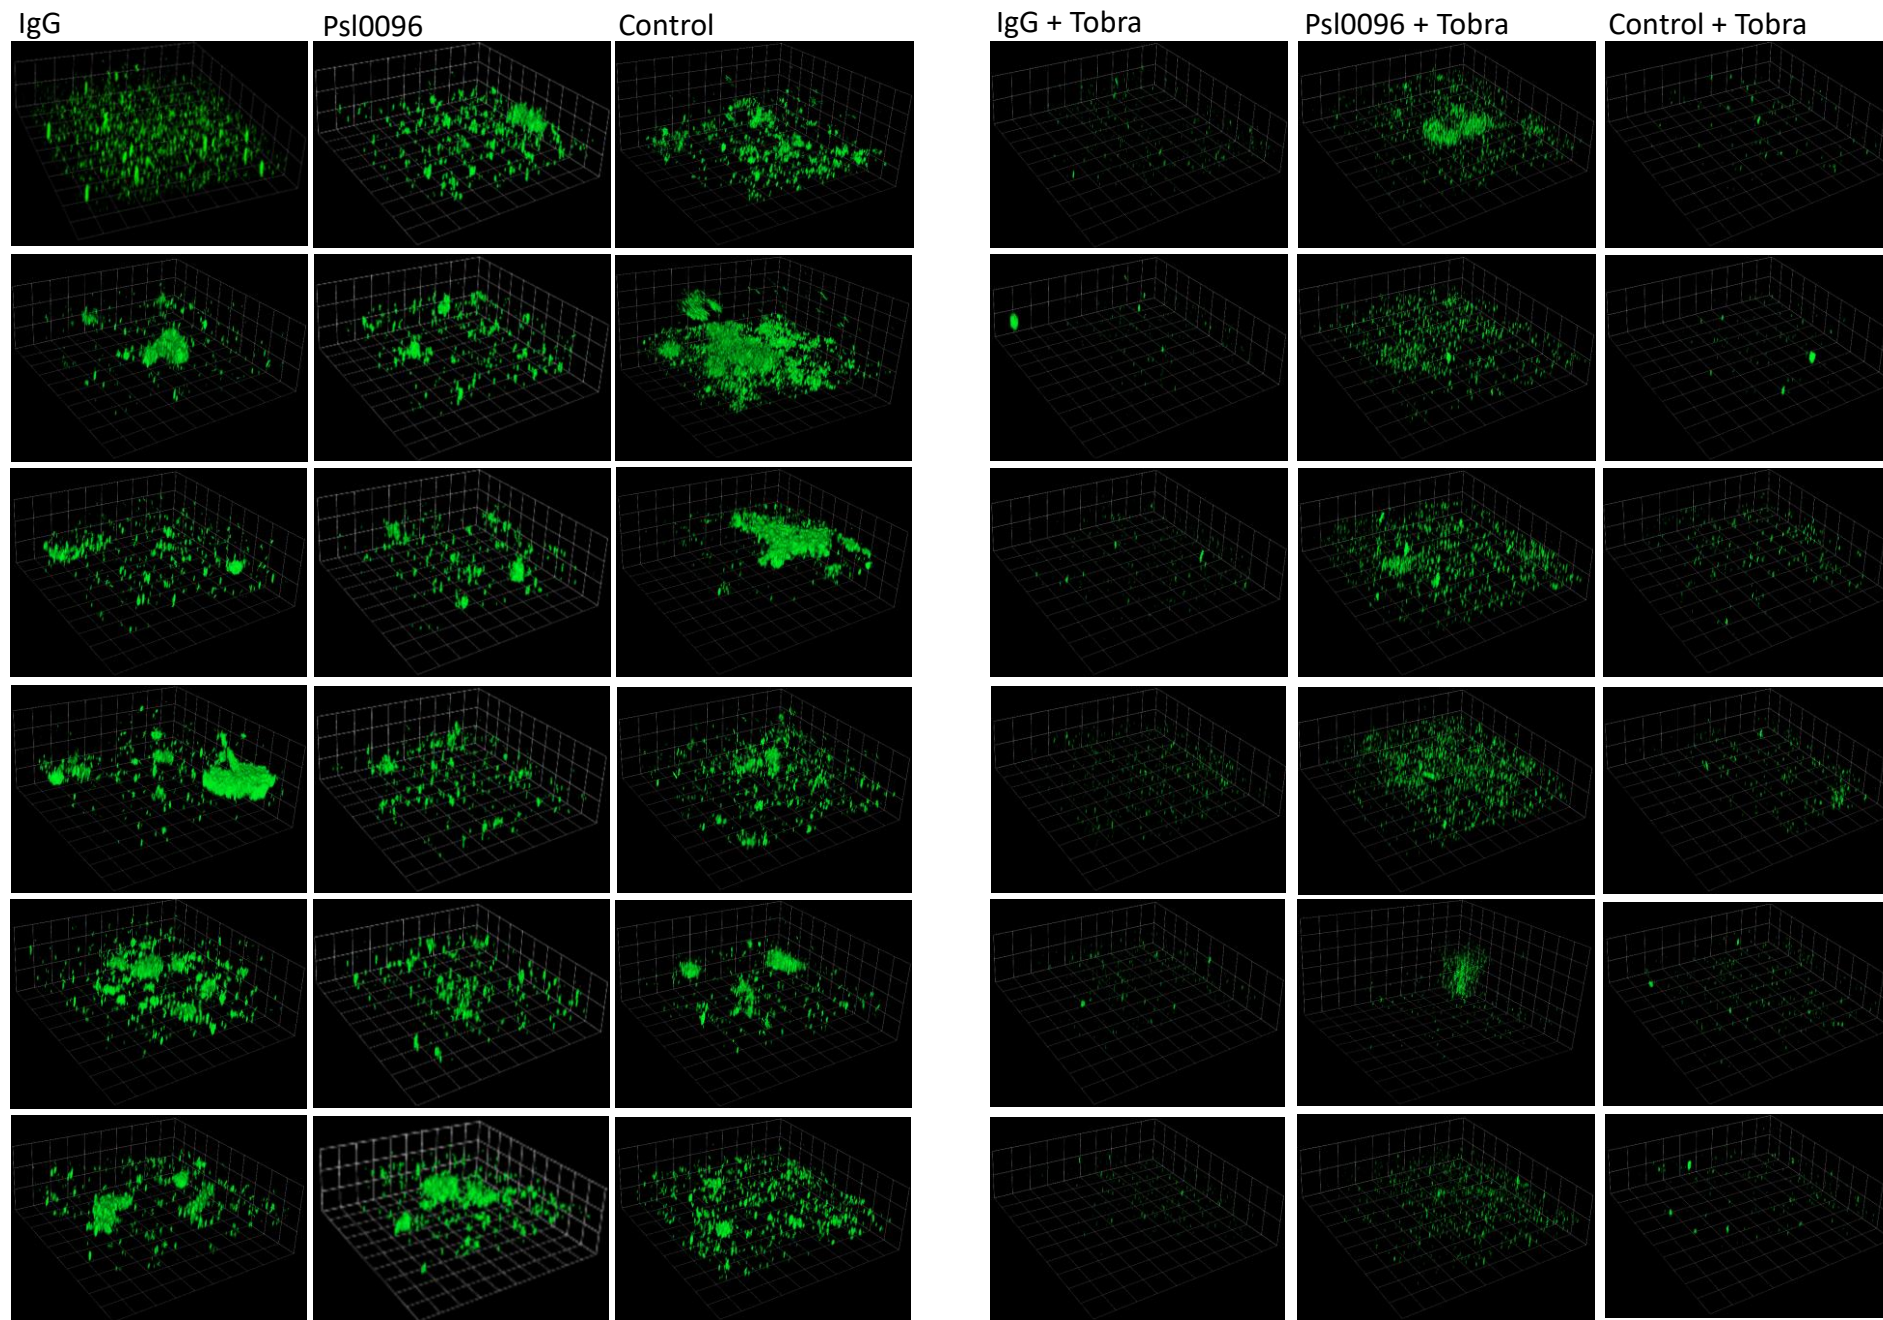



Pa263 (Eradicated) Trial3

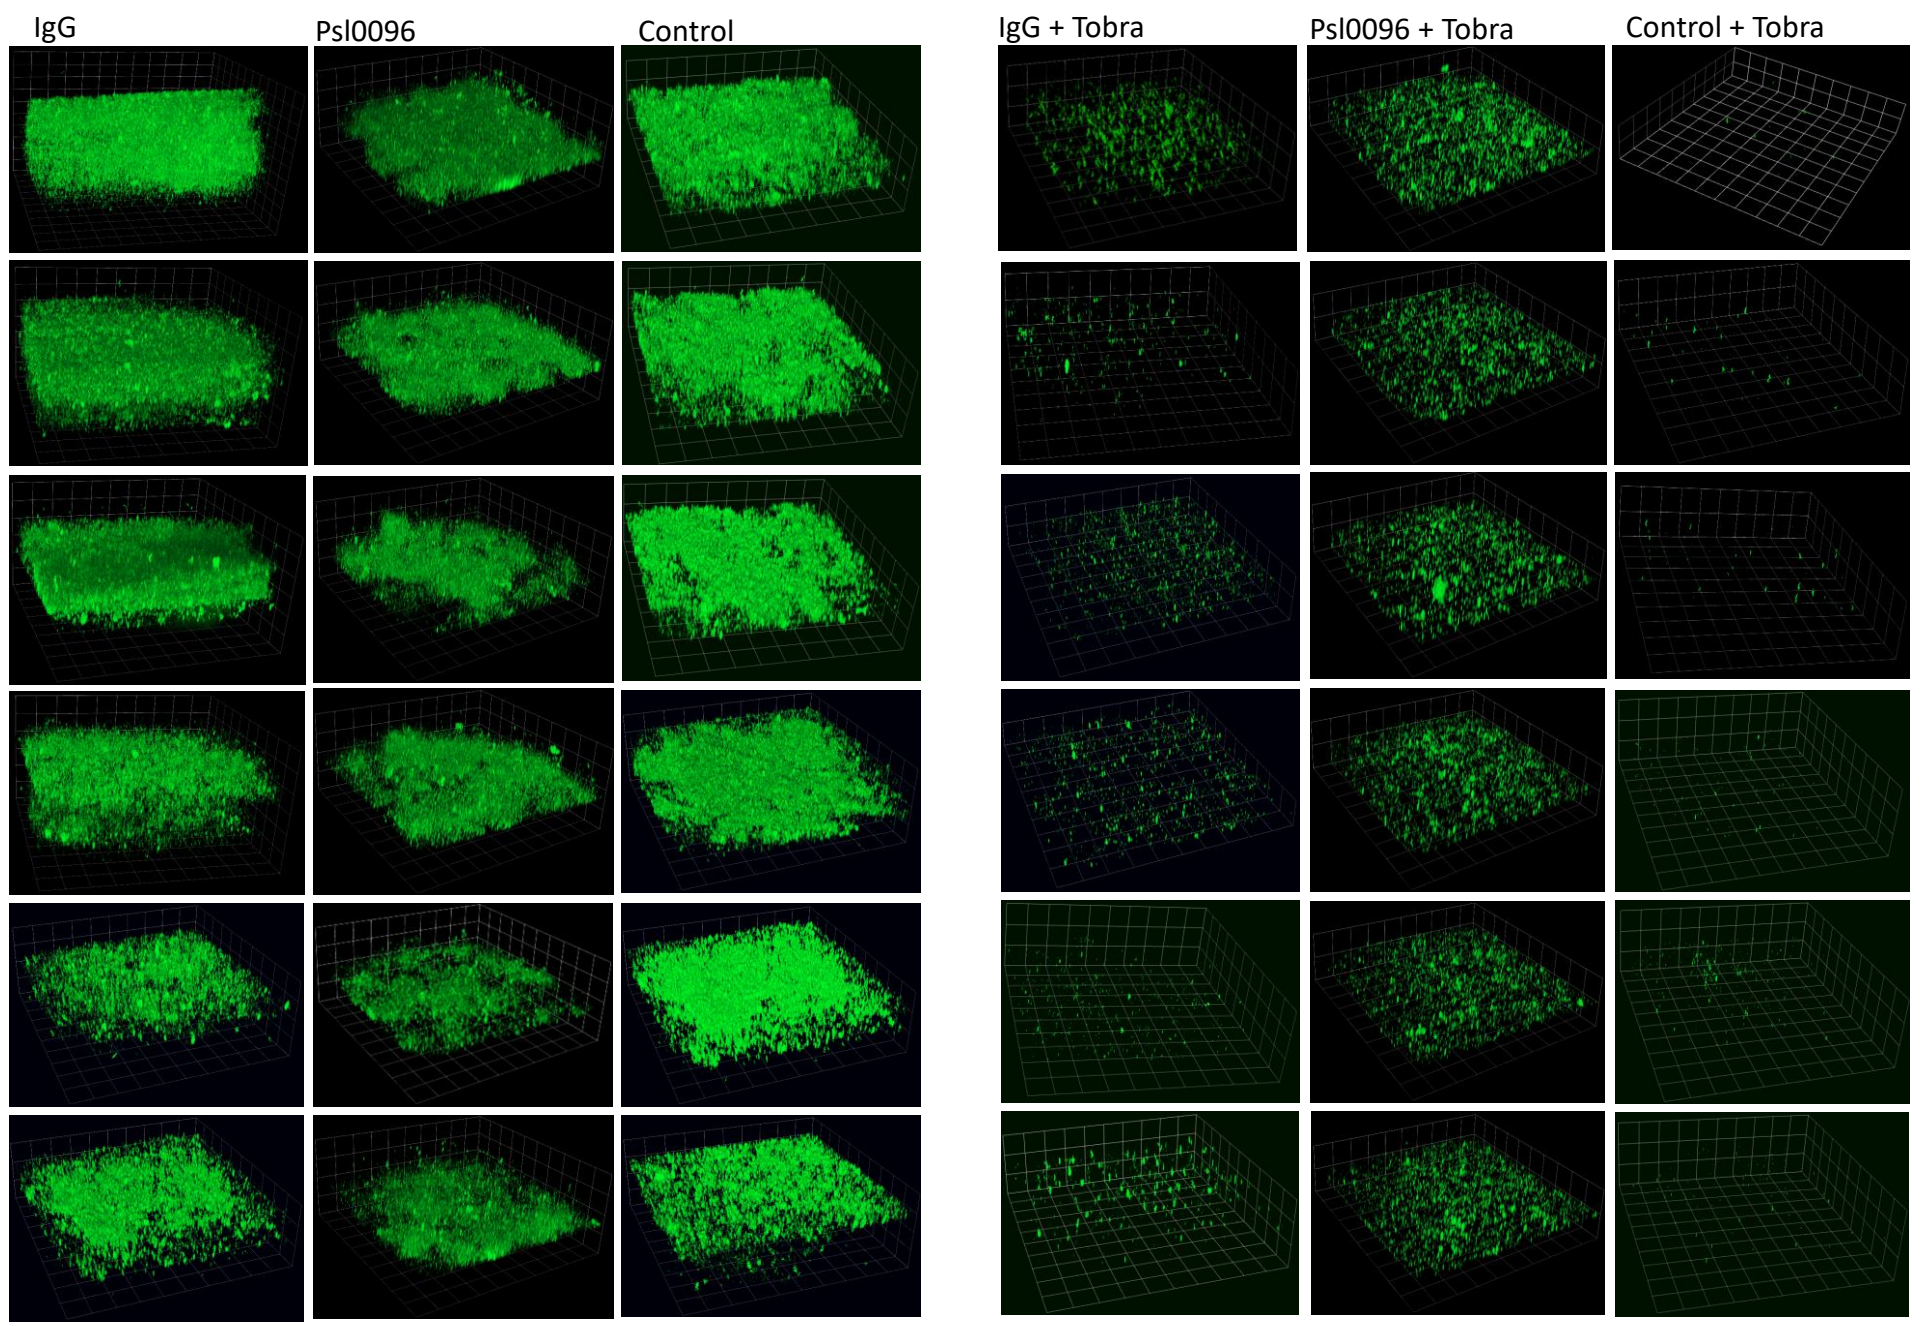



Pa50 (Eradicated) Trial1

IgG

Psl0096

Control

IgG + Tobra

Psl0096 + Tobra

Control + Tobra

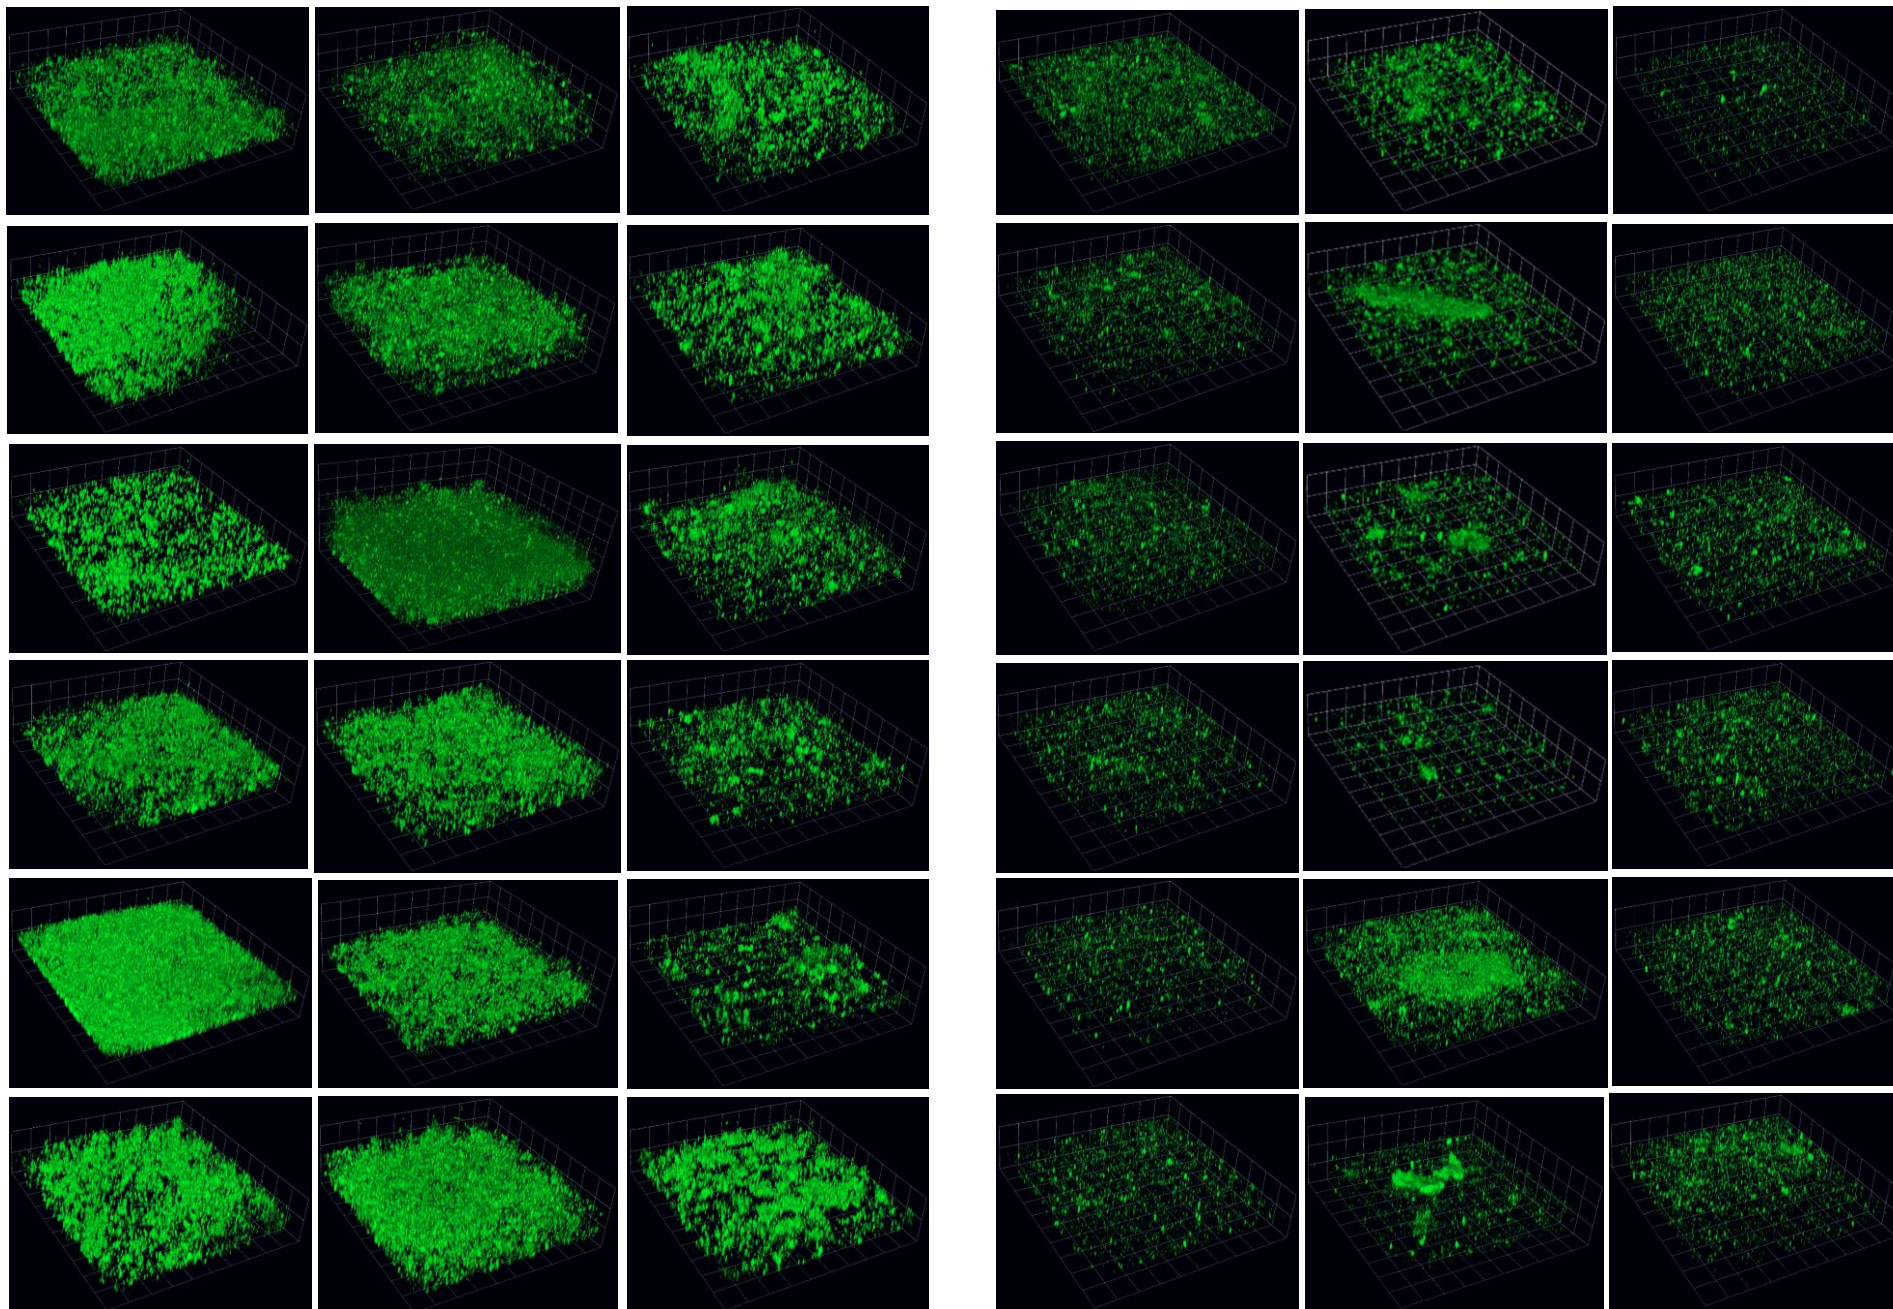



Pa50 (Eradicated) Trial2

IgG

Psl0096

Control

IgG + Tobra

Psl0096 + Tobra

Control + Tobra

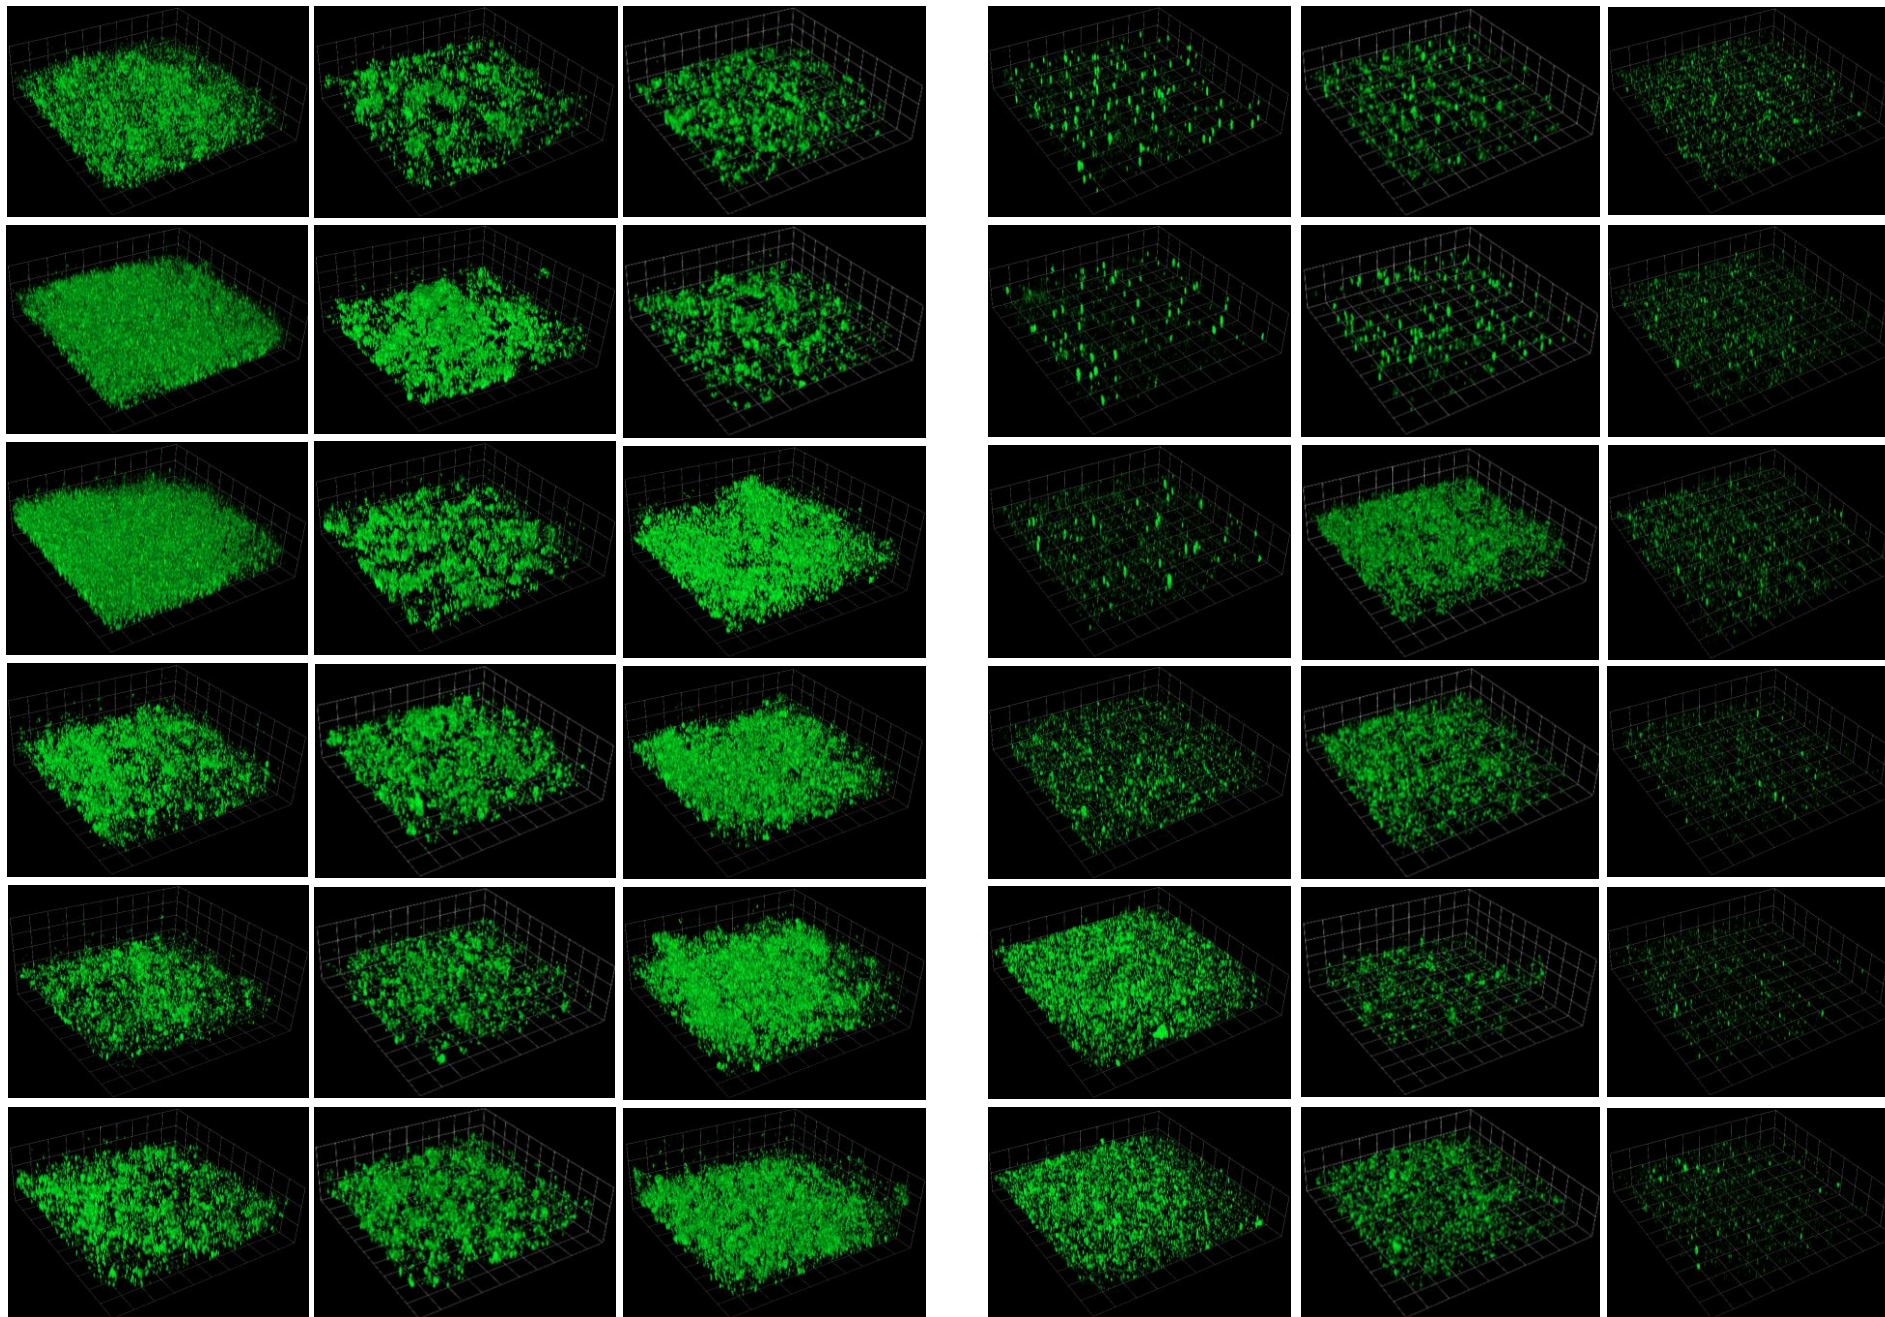



Pa50 (Eradicated) Trial3

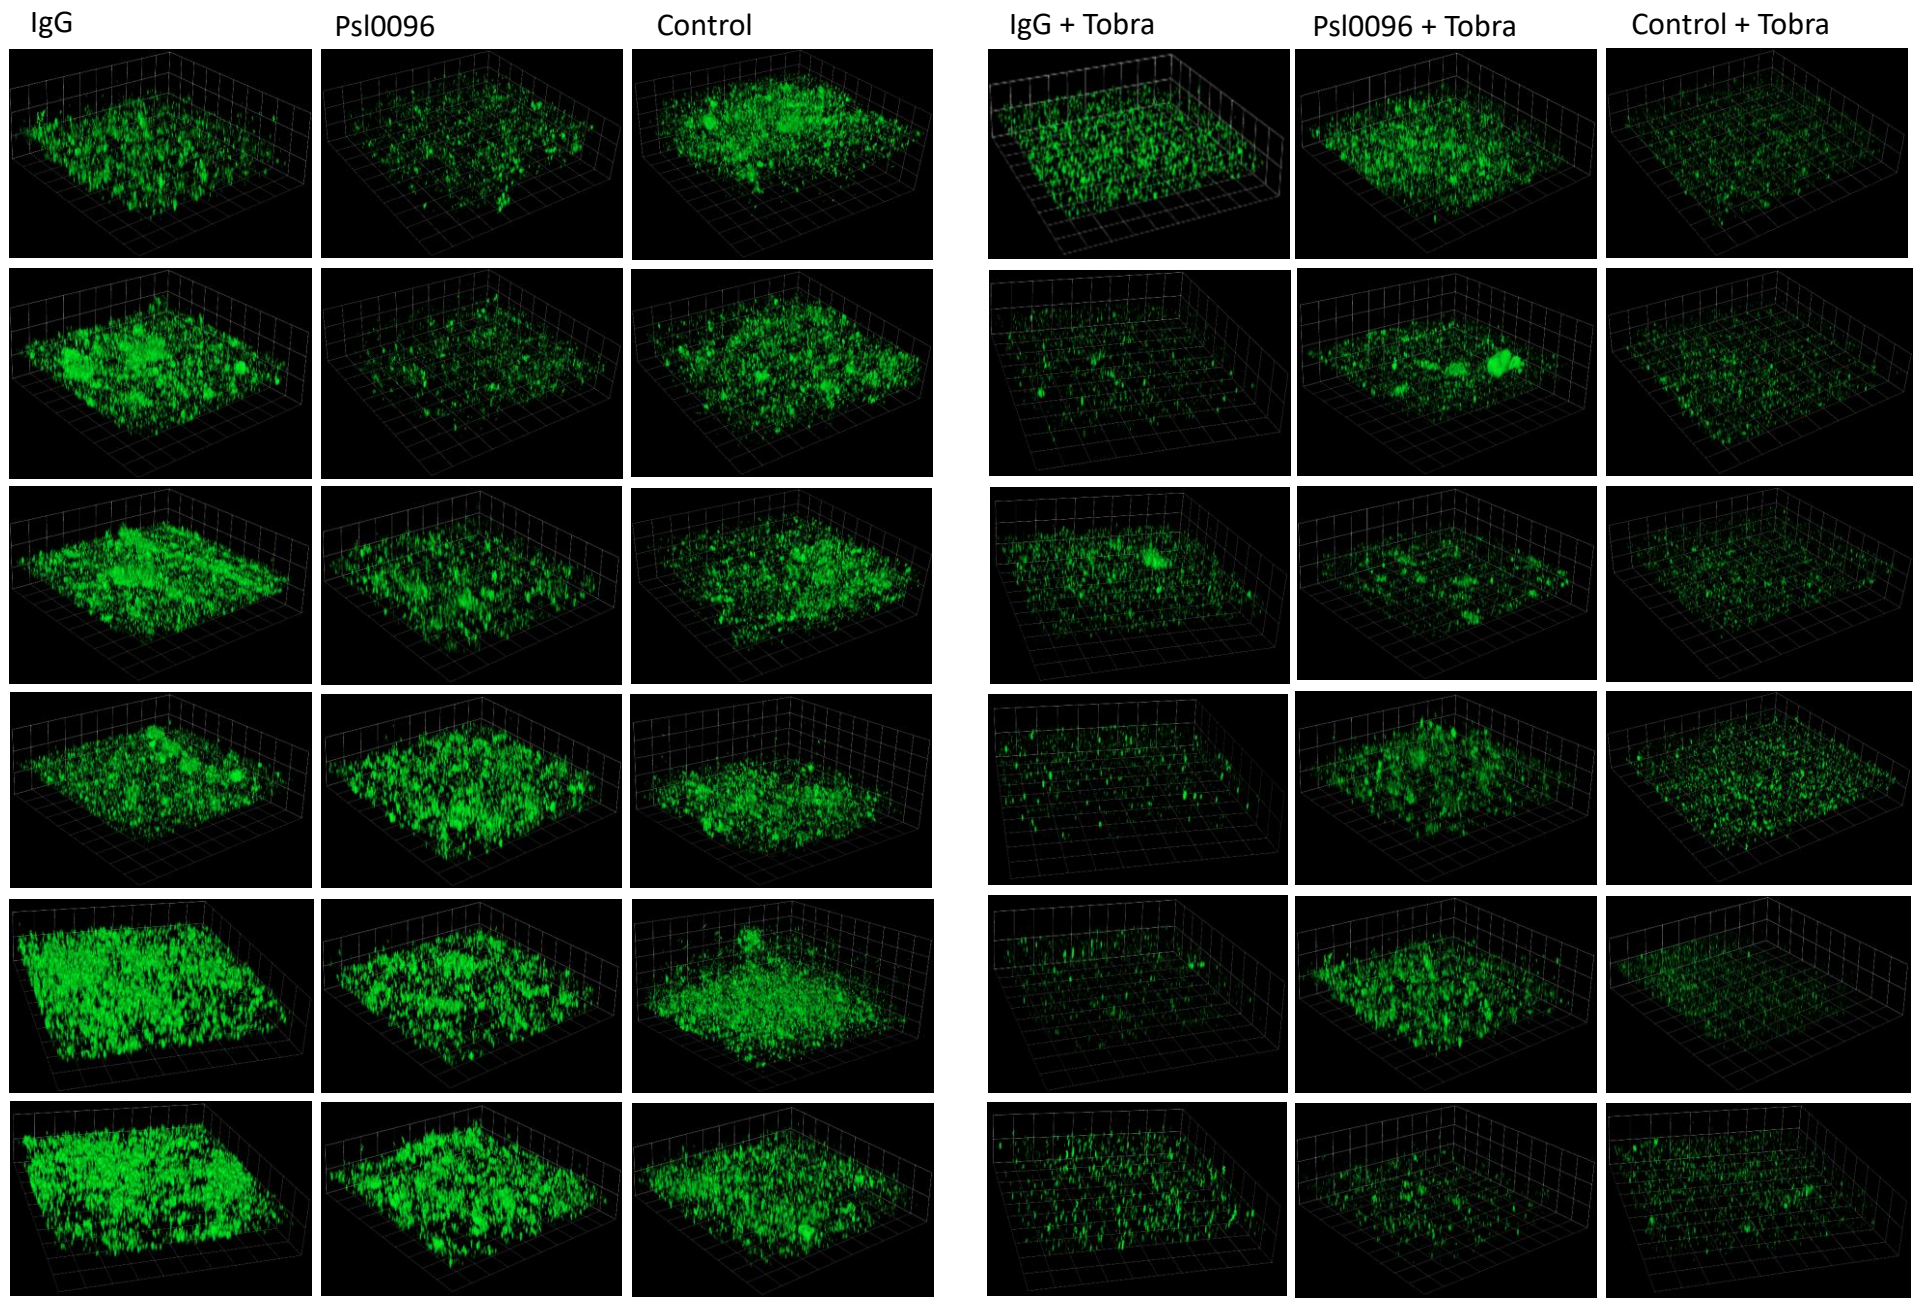



Pa558 (Eradicated) Trial1

IgG

PsI0096

Control

IgG + Tobra

PsI0096 + Tobra

Control + Tobra

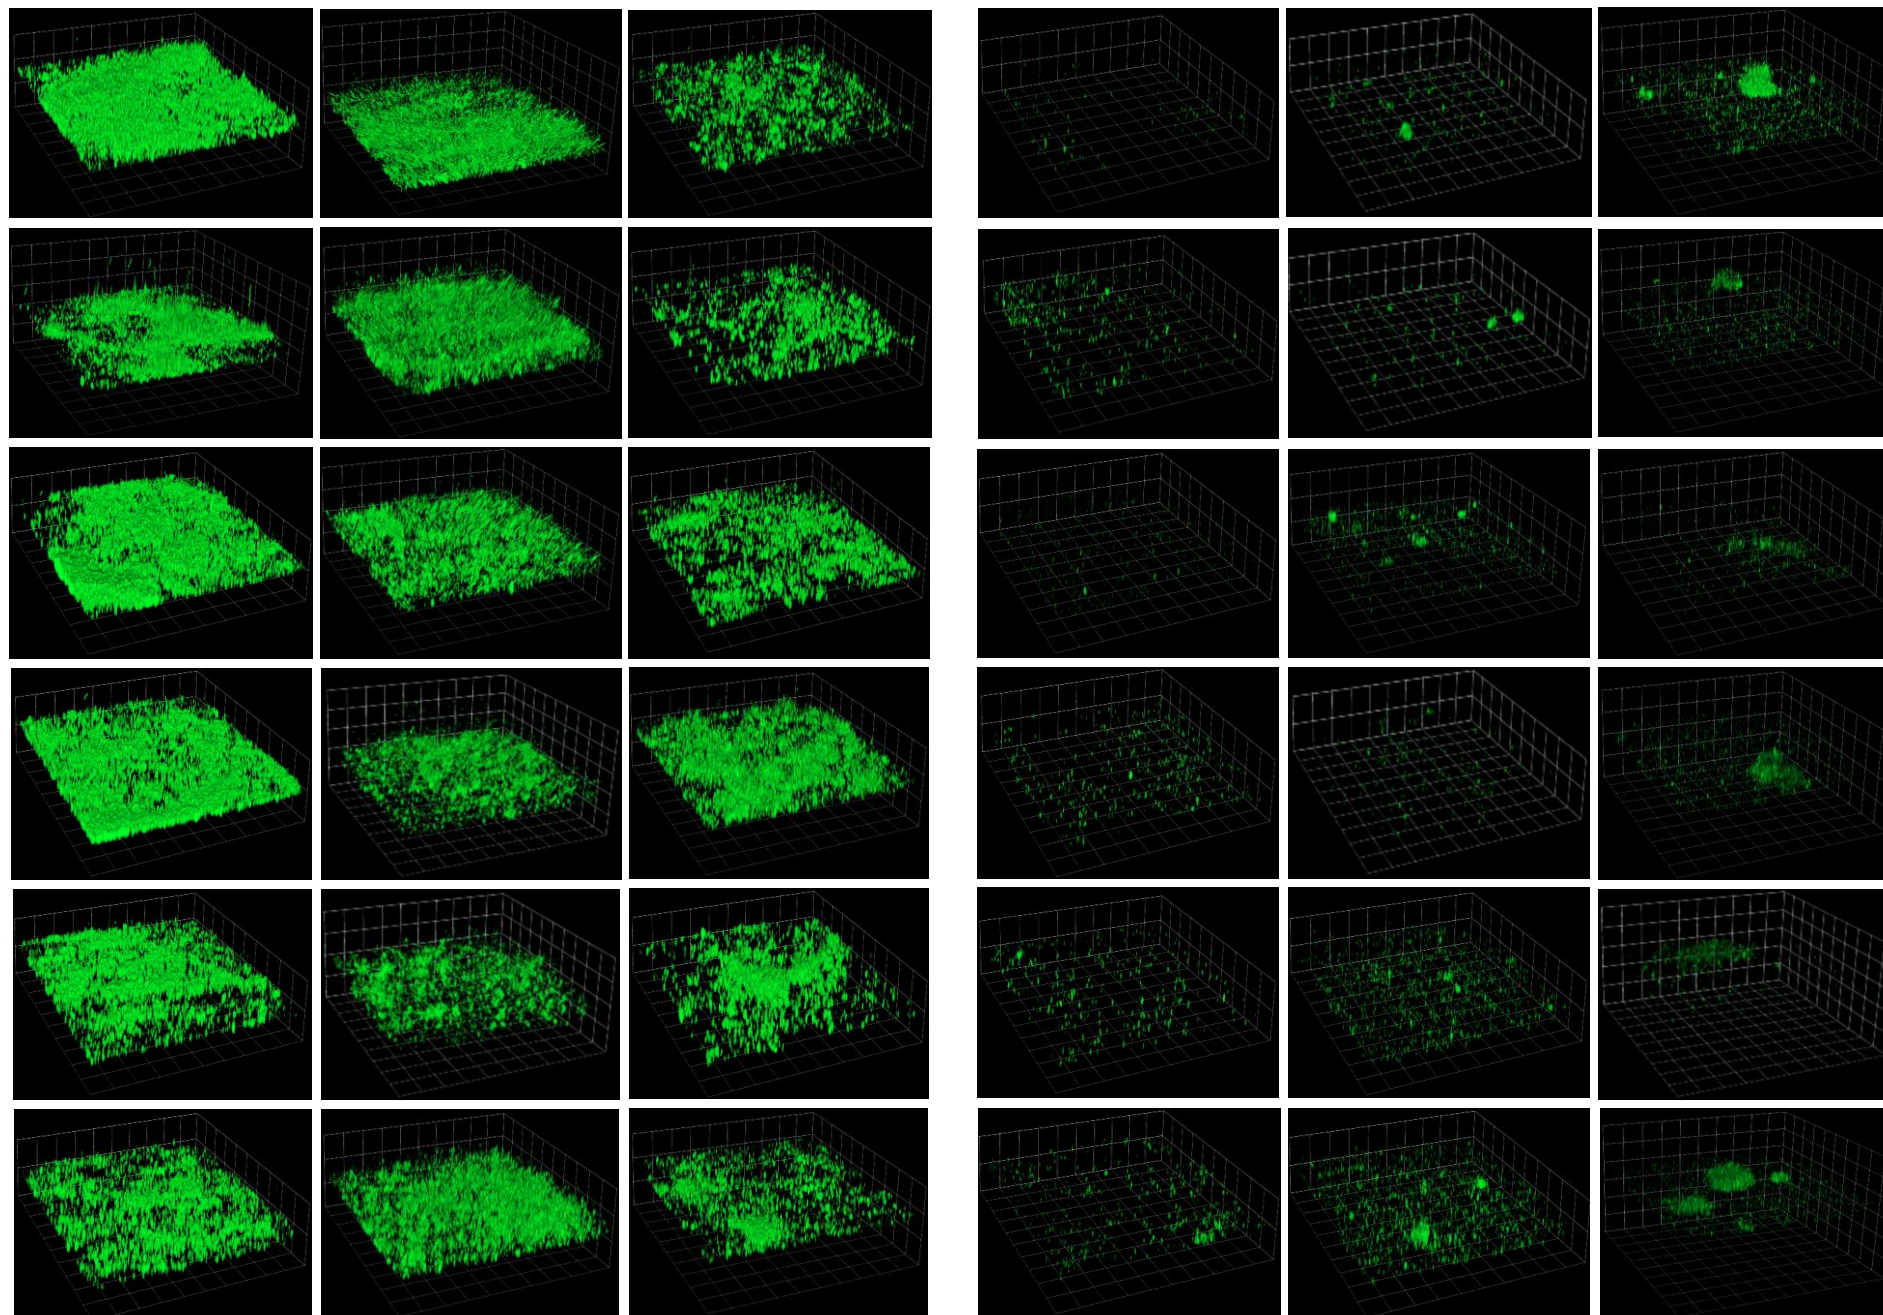



Pa558 (Eradicated) Trial2

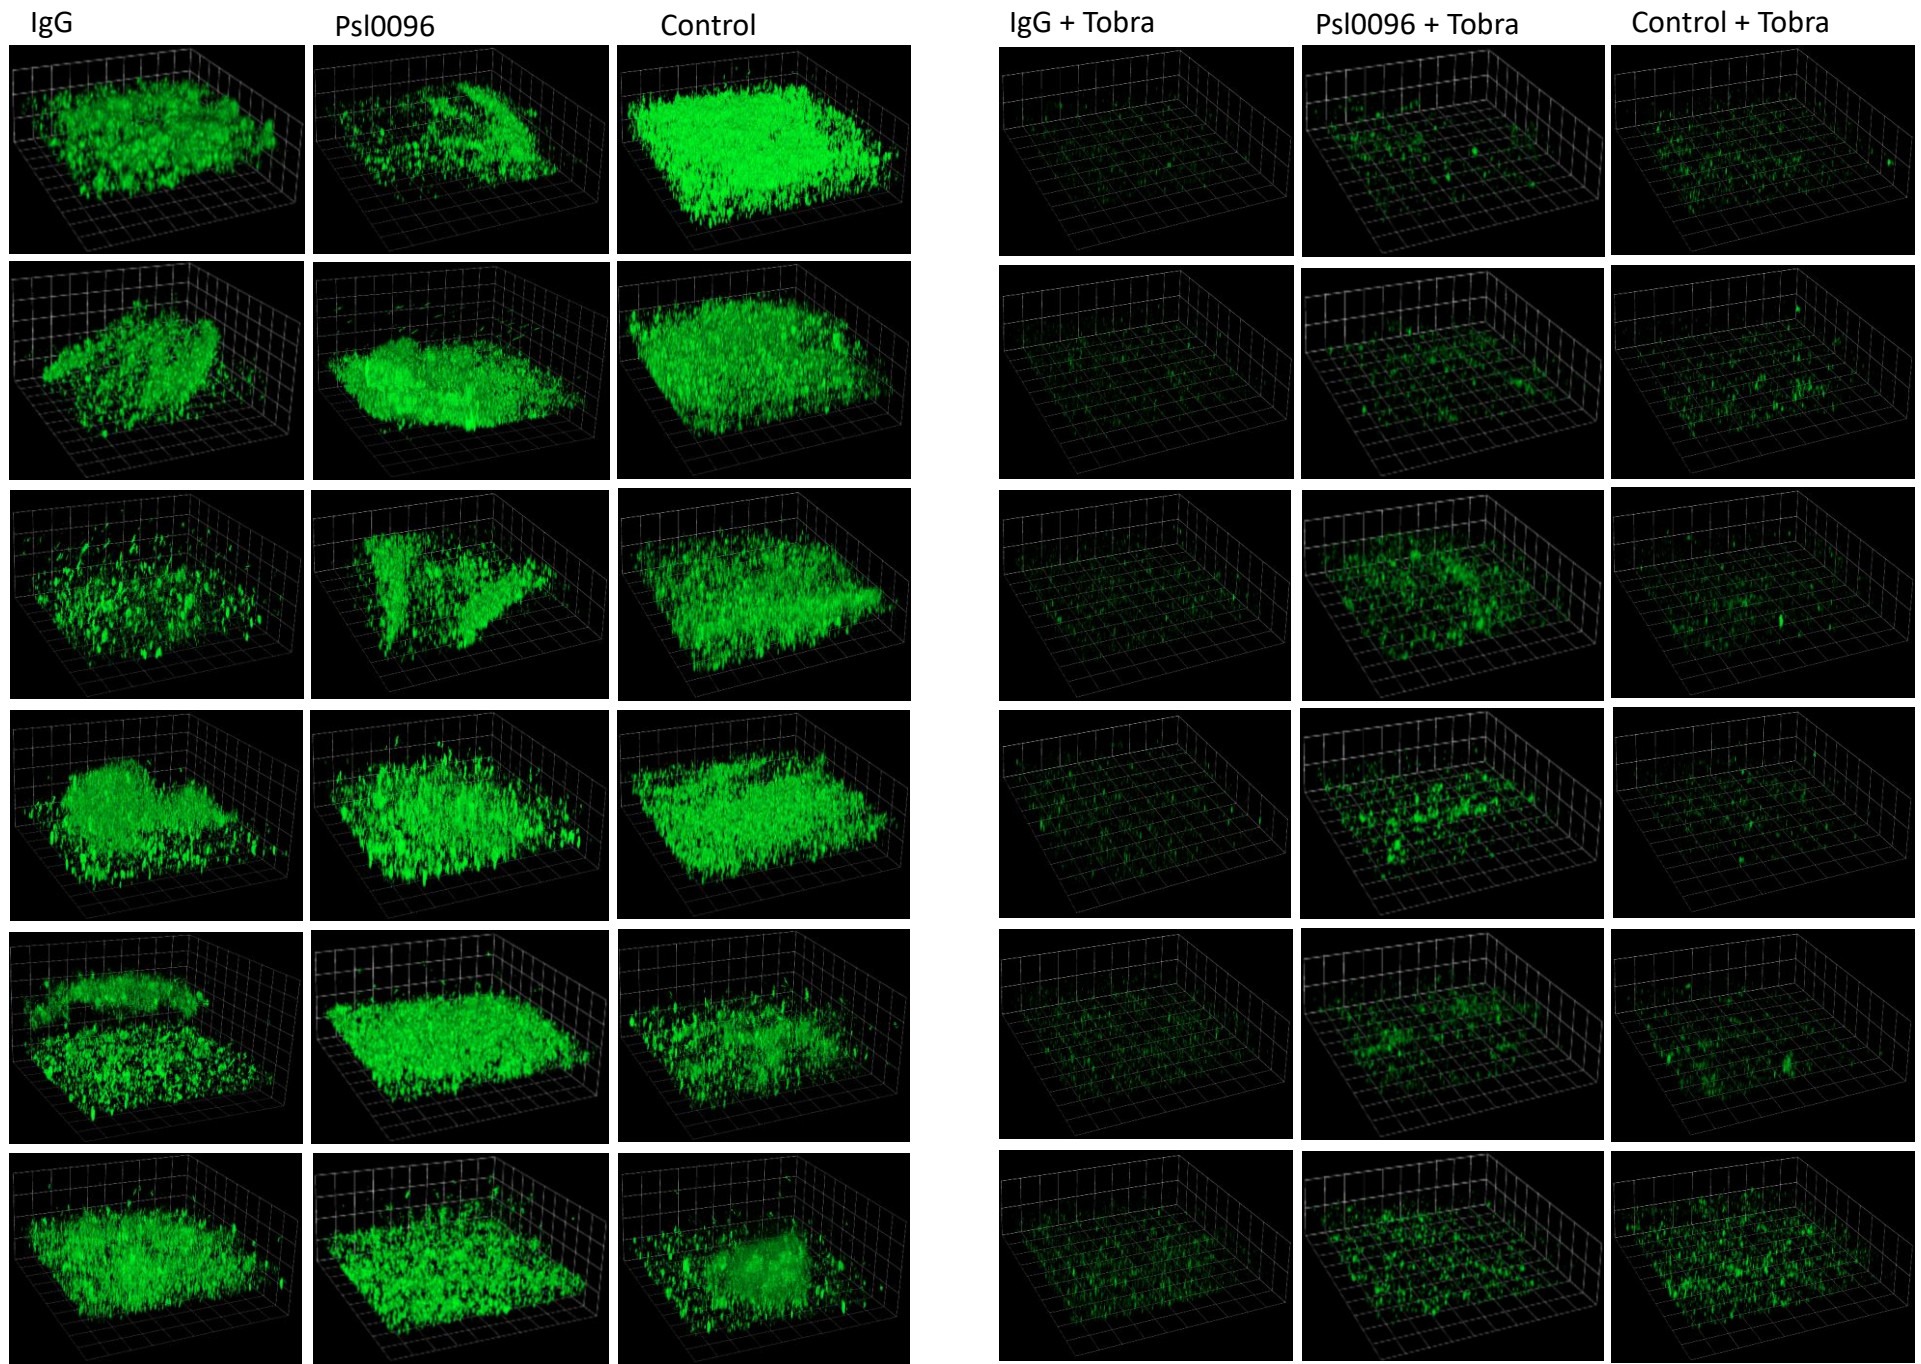



Pa558 (Eradicated) Trial3

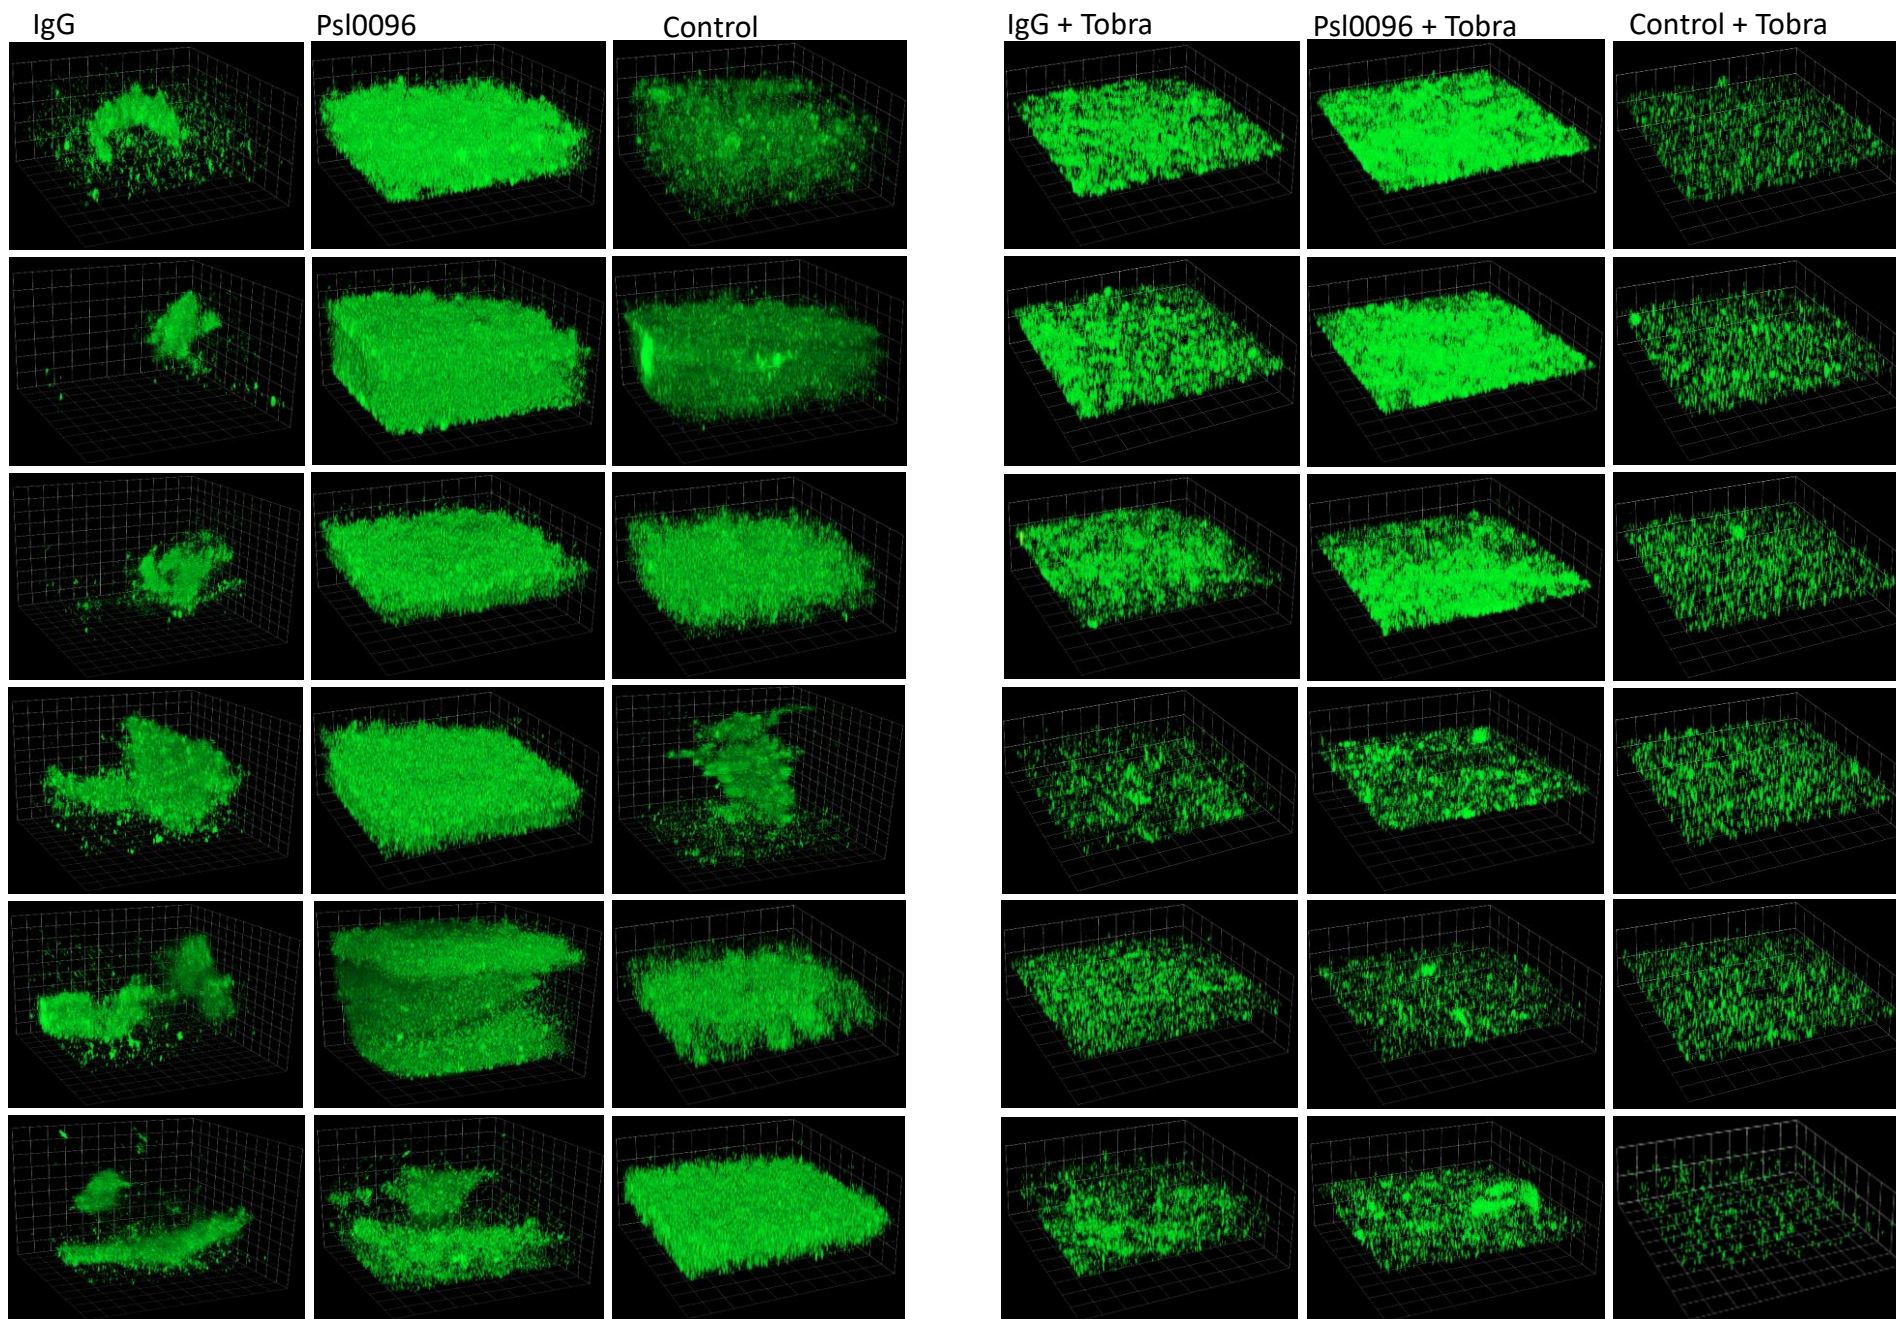

Supplement: 41522_2021_234_MOESM1_ESM.pdf [file 41522_2021_234_MOESM1_ESM.pdf]
